# Supplementary material for: Loss of aquaporin-4 results in glymphatic system dysfunction via brain-wide interstitial fluid stagnation
Source: eLife. 2023 Feb 9;12:e82232. doi: 10.7554/eLife.82232 (PMC9995113; doi:10.7554/eLife.82232)
Supplement: Figure 1—source data 1. [file elife-82232-fig1-data1.xlsx]

## Sheet: 3D-CISS MR Volumetry
							CSF space volumetry
								* CSF / brain volume ratio = CSF vol./ (Brain vol. - CSF-vol.)
	Animal code no.	Body weight [g]	Respiration rate [bpm]	Age [weeks]	3D-CISS SNR	Brain volume (round) [mm3]	Whole CSF (round) [mm3]	Whole CSF (round to 4 digits after '.')	Control sum of compartments *	Lateral ventricles	3rd ventricle	4th ventricle	Basilar artery	CoW	Parietal	Remaining perivascular CSF	Whole ventricular	Whole perivascular
Aqp4 (+/+)	1	28	202	15	3.33	487.8	15.68	0.0332	0.03322	0.0109	0.0049	0.00284	0.00045	0.00183	0.0034	0.0089	0.01864	0.0112
	2	28	219	15	3.28	444.5	15.22	0.0355	0.03553	0.0181	0.0061	0.00258	0.00035	0.0013	0.002	0.0051	0.02678	0.0067
	3	27.5	132	15	3.05	459.7	16.71	0.0377	0.0378	0.0107	0.0052	0.00234	0.00067	0.00239	0.0043	0.0122	0.01818	0.0153
	4	28	133	15	3.49	466.1	17.48	0.039	0.03906	0.0123	0.0058	0.00277	0.00086	0.00293	0.0039	0.0105	0.0208	0.0143
	5	24	184	13	4.07	509.6	20.27	0.0414	0.04148	0.014	0.006	0.00271	0.00059	0.00478	0.0069	0.0065	0.0227	0.0119
	6	30	184	12	3.58	494	21.01	0.0445	0.04451	0.0161	0.0056	0.00282	0.00047	0.00462	0.0072	0.0077	0.02447	0.0128
									0
Aqp4 (-/-)	7	29	164	15	3.75	536.3	14.65	0.0281	0.02812	0.0071	0.00436	0.0031	0.00034	0.00231	0.0049	0.00601	0.01455	0.0087
	8	30	138	15	3.5	519.3	17.06	0.034	0.03397	0.0111	0.00508	0.00278	0.00072	0.00272	0.0047	0.00687	0.01897	0.0103
	9	27	206	15	3.58	525.4	15.35	0.0301	0.03012	0.00843	0.00411	0.00207	0.00051	0.00282	0.0052	0.00698	0.01462	0.0103
	10	24	200	12	3.77	522.1	12.03	0.0236	0.02356	0.0067	0.00421	0.00266	0.00017	0.00232	0.0036	0.0039	0.01357	0.0064
	11	25	178	10	3.97	500.7	16.23	0.0337	0.03371	0.0068	0.00373	0.00229	0.00046	0.00436	0.0072	0.00887	0.01284	0.0137
	Mann Whitney test (p-value)	0.7662	>0.9999 (exact)	0.697	0.1385	0.0087	0.1255	0.0173		0.0173	0.0087	0.6623	0.4286	0.9307	0.4589	0.2468	0.0173	0.1623
Aqp4 (+/+)			>0.9271 (approximate)
	MEAN	27.5833	175.667	14.1667	3.46667	476.95	17.7283	0.03855	0.0386	0.0136833	0.0056	0.00267667	0.000565	0.002975	0.00461667	0.00848333	0.0219283	0.0120333
	SD	1.96002	35.8813	1.32916	0.347716	24.26	2.40065	0.00405894	0.00406063	0.00296676	0.000469042	0.000189596	0.000182839	0.00144395	0.002041	0.00260953	0.0033684	0.00301839
Aqp4 (-/-)
	MEAN	27	177.2	13.4	3.714	520.76	15.064	0.0299	0.029896	0.008026	0.004298	0.00258	0.00044	0.002906	0.00512	0.006526	0.01491	0.00988
	SD	2.54951	27.6622	2.30217	0.182839	12.9359	1.92366	0.00430755	0.00431548	0.0018528	0.000495247	0.00040651	0.000204083	0.000844796	0.00131034	0.00180145	0.0023863	0.00266683
Overall	MEAN	27.3182	176.364	13.8182			*Note: Values used for statistical analysis were rounded from double to single precision, so a discrepancy at the 4th digit after '.' between the CSF volume and whole segmented CSF space ratio are possible due to quantization error.
	SD	2.14794	30.8294	1.77866
