# Supplementary material for: Loss of aquaporin-4 results in glymphatic system dysfunction via brain-wide interstitial fluid stagnation
Source: eLife. 2023 Feb 9;12:e82232. doi: 10.7554/eLife.82232 (PMC9995113; doi:10.7554/eLife.82232)
Supplement: Figure 1—source data 2. [file elife-82232-fig1-data2.xlsx]

## Sheet: BRAIN H20 CONTENT ex-vivo
MEASURED VALUES [ml / g dry weight]								ROUND VALUES (2 digits after '.')
Animal code no.	AQP4 (+/+)		Animal code no.	AQP4 (-/-)				Animal code no.	AQP4 (+/+)		Animal code no.	AQP4 (-/-)
1	3.47052		4	3.674				1	3.47		4	3.67
2	3.46535		5	3.56719				2	3.47		5	3.57
3	3.50703		6	3.7373				3	3.51		6	3.74
4	3.48842							4	3.49
5	3.36689							5	3.37
Mann-Whitney U-test p=0.0357								Mann-Whitney U-test p=0.0358
MEAN	3.45964			3.6595					3.462			3.66
SD	0.054377			0.0859742					0.054037			0.08544
