# Supplementary material for: Loss of aquaporin-4 results in glymphatic system dysfunction via brain-wide interstitial fluid stagnation
Source: eLife. 2023 Feb 9;12:e82232. doi: 10.7554/eLife.82232 (PMC9995113; doi:10.7554/eLife.82232)
Supplement: Figure 1—source data 3. [file elife-82232-fig1-data3.xlsx]

## Sheet: CSF PRODUCTION in-vivo
Total CSF produced [µlL]
no.	Aqp4(-/-)		no.	Aqp4(+/+)
1	3.17647		6	4.11765
2	4.41176		7	3.29412
3	3.70588		8	4.21429
4	5.29412		9	5.23529
5	5.35294		10	5.05882
			11	5.47059
MEAN	4.38824			4.38403
SD	0.959924			0.785442
Total CSF produced - normalized values [10e-2 µl/min] - (round to 4 digits after '.')
no.	Aqp4(-/-)		no.	Aqp4(+/+)
1	4.8869		6	6.3348
2	6.7873		7	5.0679
3	5.7014		8	6.4835
4	8.1448		9	8.0543
5	8.2353		10	7.7828
			11	8.4163
Mann Whitney test
P value			0.9307
Exact or approximate P value?			Exact
P value summary			ns
Significantly different (P < 0.05)?			No
One- or two-tailed P value?			Two-tailed
Sum of ranks in column A,B			29 , 37
Mann-Whitney U			14
