# Supplementary material for: Loss of aquaporin-4 results in glymphatic system dysfunction via brain-wide interstitial fluid stagnation
Source: eLife. 2023 Feb 9;12:e82232. doi: 10.7554/eLife.82232 (PMC9995113; doi:10.7554/eLife.82232)
Supplement: Figure 1—source data 4. [file elife-82232-fig1-data4.xlsx]

## Sheet: ISF SPACE VOLUME with TMA
	AWAKE animals						K/X anesthetized
	ISF volume α			Tortuosity λ			ISF volume α			Tortuosity λ
No.	Aqp4(+/+)	Aqp4(-/-)		Aqp4(+/+)	Aqp4(-/-)		Aqp4(+/+)	Aqp4(-/-)		Aqp4(+/+)	Aqp4(-/-)
1	0.094003	0.225		1.44754	1.63259		0.175534	0.29433		1.43258	1.5895
2	0.112167	0.101976*		1.49505	1.427968*		0.185294	0.201998		1.6438	1.60311
3	0.074148	0.174671		1.46616	1.11691		0.276447	0.35535		1.62138	1.20973
4	0.153477	0.113704		1.53803	1.34799		0.191695	0.170074*		1.57184	1.420554*
5	0.083665	0.155336		1.49323	1.37802		0.151395	0.231245		1.46795	1.31426
6	0.094468	0.168353		1.42522	1.55777		0.168446	0.227256		1.49813	1.33573
7	0.108551	0.212		1.46781	1.46735		0.219793	0.310201		1.60522	1.46637
8	0.113807	0.27*		1.48226	1.420159*		0.357282*	0.352656		1.600700923*	1.31212
9	0.187017			1.68636			0.284132			1.64824
10	0.073797			1.34149			0.100994*			1.313499*
11	0.113357			1.3314			0.165292			1.31099
12	0.066544			1.41681			0.092514*			1.383697*
13	0.100703			1.48054			0.209982			1.58445
14	0.107733			1.33871			0.222345			1.42356
15	0.102938			1.47802			0.140124			1.46233
16	0.146142			1.59783			0.248385			1.60267
17	0.231825*			1.492282*			0.35787*			1.518281*
18	0.217351*			1.433559*			0.320391			1.52728
19	0.173702			1.46435			0.297723			1.45326
20	0.227769*			1.405002*			0.310129			1.38871
	*Excluded based on mean± 1.5 x SD rule (see 'Materials and methods')
ISF volume α ANOVA
ANOVA summary
F			24.33
P value			<0.0001
P value summary			****
Significant diff. among means (P < 0.05)?			Yes
R squared			0.6348
Number of families			1
Number of comparisons per family			2
Alpha			0.05
Bonferroni's multiple comparisons test				Mean Diff.	95.00% CI of diff.			Below threshold?	Summary	Adjusted P Value
Aqp4(+/+) vs. Aqp4(-/-)				-0.06271	-0.1175 to -0.007957			Yes	*	0.0219	AWAKE
Aqp4(+/+) vs. Aqp4(-/-)				-0.05892	-0.1112 to -0.006664			Yes	*	0.0243	K/X
Tortuosity λ ANOVA
ANOVA summary
F			1.919
P value			0.1412
P value summary			ns
Significant diff. among means (P < 0.05)?			No
R squared			0.1205
Number of families			1
Number of comparisons per family			2
Alpha			0.05
Šídák's multiple comparisons test				Mean Diff.	95.00% CI of diff.			Below threshold?	Summary	Adjusted P Value
Aqp4(+/+) vs. Aqp4(-/-)				0.05092	-0.07861 to 0.1805			No	ns	0.5994	AWAKE
Aqp4(+/+) vs. Aqp4(-/-)				0.1107	-0.01287 to 0.2344			No	ns	0.0858	K/X
