# Supplementary material for: Loss of aquaporin-4 results in glymphatic system dysfunction via brain-wide interstitial fluid stagnation
Source: eLife. 2023 Feb 9;12:e82232. doi: 10.7554/eLife.82232 (PMC9995113; doi:10.7554/eLife.82232)
Supplement: Figure 2—source data 1. [file elife-82232-fig2-data1.xlsx]

## Sheet: AVERAGE MR DIFFUSION SCORES
	ADC values computed from 21 ROI																							AVERAGE ADC				Animal code no.	Body weight [g]	Respiration rate [bpm]	Age [weeks]
	OLF	CP	LV	WM	HIP	CA/RSP	3V	VIS	SS	PCS	AUD	4V	TH	HY	HAB	PERI	MB	HB	PAG	CB	CoW	Animal code					Aqp4 (+/+)	1	21	180.08	10
AQP4(+/+)	0.5232	0.5327	1.9358	0.54	0.5454	0.5725	1.9289	0.5101	0.5451	1.4068	0.53	1.2828	0.536	0.6257	0.7195	0.55	0.5432	0.5424	0.5687	0.5068	1.02	1						2	19	170	10
	0.4876	0.4906	1.947	0.503	0.5146	0.4778	1.9533	0.468	0.4787	0.836	0.4932	0.9405	0.5045	0.5385	0.6502	0.5044	0.489	0.4978	0.5541	0.4322	0.6961	2						3	20	184.38	11
	0.4963	0.4987	1.8125	0.472	0.5439	0.4909	1.8008	0.46	0.4991	0.7151	0.499	0.7043	0.4927	0.518	0.5234	0.4972	0.4821	0.4848	0.5277	0.4465	0.5016	3						4	25	175	10
	0.5063	0.5132	1.7507	0.505	0.544	0.512	1.9625	0.4781	0.5022	0.8	0.5116	0.8037	0.5132	0.5892	0.5372	0.5237	0.5084	0.5184	0.5399	0.4527	0.6205	4						5	23	180.59	10
	0.5008	0.5259	1.7885	0.49	0.5481	0.507	1.7863	0.487	0.509	0.8833	0.5129	0.7251	0.5142	0.5536	0.5301	0.5335	0.5051	0.5162	0.5404	0.4907	0.7013	5						6	26	170	12
	0.5143	0.5204	1.9848	0.483	0.5285	0.5069	1.9798	0.45	0.4938	1.0163	0.5063	0.8197	0.5125	0.575	0.5839	0.5372	0.5013	0.5098	0.5422	0.4733	0.6854	6					Aqp4 (-/-)		19	160	11
AQP4(-/-)	0.5256	0.5336	1.8266	0.565	0.5457	0.527	1.8596	0.495	0.521	1.0005	0.5237	0.6788	0.5354	0.599	0.7293	0.5233	0.5255	0.61	0.5488	0.4966	0.7712	7						7	19	160	10
	0.5026	0.5264	1.7069	0.503	0.5513	0.4983	1.8435	0.485	0.5131	0.9148	0.5161	0.7174	0.5223	0.5669	0.584	0.5213	0.5216	0.5344	0.5489	0.4471	0.6013	8						8	20	190	11
	0.5294	0.531	1.9596	0.53	0.5638	0.5108	1.8962	0.5	0.522	0.802	0.5277	0.9018	0.5488	0.5715	0.5777	0.5273	0.5285	0.5379	0.5543	0.4264	0.5799	9						9	26	175	10
	0.5389	0.5436	1.957	0.525	0.5734	0.5303	2.0124	0.49	0.5351	0.8485	0.5447	0.933	0.5527	0.5753	0.5727	0.5534	0.5316	0.5701	0.5922	0.5033	0.6357	10						10	26	190	10
	0.5528	0.5646	1.8614	0.51	0.5823	0.5302	1.9707	0.502	0.5465	0.9592	0.5505	0.7956	0.5539	0.574	0.5616	0.5605	0.5552	0.5559	0.5876	0.465	0.7343	11						11	25	160	10
	0.52	0.5412	1.7763	0.5504	0.5773	0.5361	1.9795	0.532	0.5474	0.7702	0.5427	0.7935	0.5558	0.5693	0.5256	0.5469	0.5485	0.5537	0.5786	0.4654	0.6788	12
																												Mann Whitney test (p-value)	0.935	0.632	>0.9999
	OLF	CP	LV	WM	HIP	CA/RSP	3V	VIS	SS	PCS	AUD	4V	TH	HY	HAB	PERI	MB	HB	PAG	CB	CoW						Aqp4 (+/+)
STATISTICS	Mann-Whitney U-test p-value (GraphPad Prism 9.4.1)																					Mann-Whitney U p-val	LEGEND:					MEAN	22.3333	176.675	10.5
	0.026	0.0087	0.9372	0.046	0.0043	0.2403	0.5887	0.0649	0.026	>0.9999	0.0152	0.4848	0.0087	0.6991	0.8182	0.3939	0.026	0.0087	0.0411	>0.9999	0.8182		p<0.05					SD	2.80476	5.97001	0.83666
																						AQP4 (+/+)
	0.50475	0.513583	1.86988	0.498833	0.537417	0.511183	1.90193	0.475533	0.50465	0.942917	0.508833	0.87935	0.512183	0.566667	0.590717	0.524333	0.50485	0.511567	0.5455	0.467033	0.70415	MEAN					Aqp4 (-/-)
	0.0127682	0.0162081	0.0975895	0.0236594	0.0131404	0.0326255	0.0856695	0.0213678	0.0222848	0.248147	0.0128042	0.214582	0.0142202	0.0384569	0.0790441	0.0202105	0.0212827	0.0196365	0.014123	0.0283591	0.172168	SD						MEAN	22.5	172.5	10.3333
																						AQP4 (-/-)						SD	3.50714	14.7479	0.516398
	0.528217	0.540067	1.84797	0.530567	0.565633	0.522117	1.92698	0.500667	0.53085	0.882533	0.534233	0.80335	0.544817	0.576	0.591817	0.538783	0.53515	0.560333	0.5684	0.4673	0.666867	MEAN
	0.017032	0.0136122	0.100023	0.0236357	0.0146993	0.0144706	0.0698896	0.0165851	0.0143338	0.0906617	0.0136257	0.0995577	0.0132426	0.0116742	0.070463	0.0169021	0.0135187	0.0275739	0.0200117	0.029135	0.0753773	SD					Overall	MEAN	22.4167	174.588	10.4167
																												SD	3.0289	10.9461	0.668558
	D values computed from 21 ROI																							AVERAGE D-IVIM
	OLF	CP	LV	WM	HIP	CA/RSP	3V	VIS	SS	PCS	AUD	4V	TH	HY	HAB	PERI	MB	HB	PAG	CB	CoW	Animal code
AQP4(+/+)	0.4873	0.5041	0.9503	0.512	0.5245	0.5252	0.9265	0.4977	0.5217	0.8965	0.5197	0.8448	0.5072	0.5912	0.6087	0.5189	0.5182	0.5149	0.5422	0.4802	0.7147	1
	0.4798	0.4842	0.9978	0.4824	0.5065	0.4756	0.9753	0.465	0.4745	0.7074	0.4873	0.7293	0.5013	0.5336	0.5824	0.5005	0.4861	0.4824	0.5256	0.4256	0.6145	2
	0.4888	0.4883	0.8763	0.4607	0.5354	0.4848	0.7735	0.4567	0.4964	0.641	0.4927	0.5926	0.4886	0.5096	0.5162	0.4908	0.4709	0.4739	0.5125	0.436	0.462	3
	0.4996	0.5029	0.8967	0.468	0.5353	0.5016	0.7629	0.4695	0.4942	0.7006	0.5037	0.7129	0.5024	0.5735	0.5092	0.5092	0.5009	0.5011	0.5304	0.4449	0.5143	4
	0.4992	0.5237	0.919	0.4767	0.55	0.5016	0.7623	0.4862	0.5074	0.7478	0.5128	0.6281	0.5143	0.546	0.5256	0.5297	0.5042	0.5185	0.5352	0.4873	0.5828	5
	0.511	0.5196	0.9648	0.4625	0.5245	0.5103	0.8592	0.4494	0.4911	0.7533	0.5044	0.621	0.5064	0.5666	0.5452	0.5366	0.5005	0.5072	0.536	0.4743	0.5567	6
AQP4(-/-)	0.492	0.5116	0.8276	0.5114	0.5277	0.513	0.7767	0.4813	0.5032	0.7333	0.511	0.5873	0.5172	0.5758	0.6037	0.5078	0.5038	0.5811	0.5294	0.4897	0.5774	7
	0.4899	0.522	0.8943	0.4909	0.5435	0.4957	0.5927	0.4837	0.5097	0.7159	0.513	0.6063	0.5159	0.549	0.5566	0.5135	0.5135	0.5226	0.535	0.4456	0.5174	8
	0.5143	0.5269	0.8662	0.5103	0.5582	0.5037	0.8187	0.4913	0.5178	0.6739	0.5235	0.6515	0.542	0.5659	0.5548	0.5229	0.5159	0.5286	0.5367	0.4287	0.5027	9
	0.5206	0.5328	0.9282	0.5124	0.5657	0.5246	0.7954	0.4824	0.5299	0.6861	0.5359	0.6979	0.5376	0.5589	0.5359	0.5458	0.526	0.5552	0.5682	0.4973	0.5616	10
	0.5215	0.5369	0.9192	0.4832	0.5739	0.5165	0.7646	0.4951	0.5396	0.6935	0.5366	0.6407	0.5388	0.5528	0.5152	0.5497	0.538	0.535	0.5613	0.4594	0.5791	11
	0.5066	0.53	0.8868	0.5025	0.5659	0.5256	0.8106	0.5251	0.5427	0.6757	0.5342	0.654	0.5442	0.5553	0.5152	0.5375	0.5338	0.5392	0.5581	0.46	0.5728	12
	OLF	CP	LV	WM	HIP	CA/RSP	3V	VIS	SS	PCS	AUD	4V	TH	HY	HAB	PERI	MB	HB	PAG	CB	CoW
STATISTICS	Mann-Whitney U-test p-value (GraphPad Prism 9.4.1)																					Mann-Whitney U p-value	LEGEND:
	0.0931	0.0152	0.132	0.0411	0.0238	0.1667	0.5887	0.132	0.026	0.2403	0.0152	0.4848	0.0022	0.8182	>0.9999	0.1797	0.026	0.0022	0.132	0.5887	0.6991		p<0.05
																						AQP4 (+/+)
	0.494283	0.5038	0.93415	0.47705	0.529367	0.49985	0.843283	0.47075	0.49755	0.7411	0.503433	0.688117	0.503367	0.553417	0.547883	0.514283	0.4968	0.499667	0.530317	0.45805	0.574167	MEAN
	0.0111399	0.0159434	0.0452332	0.0190325	0.0146123	0.0177342	0.0921914	0.0181816	0.0159103	0.0861845	0.0120734	0.0939042	0.0085638	0.0295714	0.0397342	0.0174603	0.0163004	0.0179311	0.0103639	0.0257774	0.0870878	SD
																						AQP4 (-/-)
	0.507483	0.5267	0.88705	0.501783	0.555817	0.513183	0.759783	0.49315	0.523817	0.6964	0.5257	0.639617	0.532617	0.559617	0.5469	0.529533	0.521833	0.543617	0.548117	0.46345	0.551833	MEAN
	0.0138901	0.00896973	0.0367385	0.0121822	0.0171714	0.0117571	0.0843188	0.016573	0.0161445	0.0236267	0.0116389	0.0389699	0.0126681	0.00979498	0.033207	0.0173676	0.013052	0.0214482	0.0163065	0.026036	0.0332622	SD
	D* values computed from 21 ROI																							AVERAGE D*-IVIM
	OLF	CP	LV	WM	HIP	CA/RSP	3V	VIS	SS	PCS	AUD	4V	TH	HY	HAB	PERI	MB	HB	PAG	CB	CoW	Animal code
AQP4(+/+)	4.8838	4.8217	5.4829	6.2231	7.0533	6.4769	5.7675	5.0852	5.5847	5.4162	6.8588	5.5381	7.0002	6.5216	7.3101	5.3833	6.1146	5.2614	5.9564	5.5066	5.3137	1
	4.5594	4.3033	5.3246	4.6346	4.5884	4.0155	5.4486	4.0413	3.2764	5.2801	4.3329	5.2051	3.6364	3.9107	4.7442	4.1424	4.7109	4.2719	5.0951	3.584	5.1729	2
	4.8307	5.4861	5.5841	5.5522	4.9664	5.7935	5.5295	6.6419	6.4845	5.1893	5.3478	5.6785	5.3109	5.1503	4.9459	5.5619	6.7442	6.0271	5.5353	5.8393	6.8296	3
	3.5733	4.8033	5.4009	5.2626	5.5971	5.2832	5.3838	3.7752	4.5934	5.2361	4.0259	5.4652	4.3642	5.0908	3.6674	4.8923	5.5907	5.4303	5.6533	4.2817	5.5359	4
	5.0056	4.566	5.3211	4.8402	5.0174	3.7051	5.3578	5.485	3.6438	5.5815	5.88	5.3943	5.1232	5.9908	2.4112	5.8204	4.1462	6.6729	5.0577	6.8897	6.0677	5
	4.4779	5.0626	5.5145	6.0791	6.5087	4.7406	5.5077	6.0374	6.7931	6.2535	6.371	5.6418	6.2518	5.5175	6.0064	6.9906	2.9043	7.5552	5.5086	5.1928	6.1181	6
AQP4(-/-)	4.2484	5.0922	5.2283	4.7517	4.0895	4.5291	5.2164	4.7887	4.3736	4.9356	4.7737	5.2408	4.9373	4.5283	4.7233	4.7134	5.1563	4.2366	4.6463	3.6896	5.0848	7
	5.2559	4.1943	5.4223	5.3649	7.4383	4.0364	5.4707	5.5076	6.3373	5.2116	5.8745	5.5833	5.2109	6.3011	6.6364	4.8682	5.0532	4.5628	5.7254	4.7089	5.5831	8
	4.9586	5.3567	5.5621	5.42	4.8321	5.6037	5.5222	4.5736	4.9147	5.3585	5.7486	5.5443	5.1758	5.1825	4.8413	6.3405	6.0817	5.372	5.5059	6.2894	5.8461	9
	5.2078	6.1575	5.6806	5.6075	4.5547	5.0057	5.7362	5.4006	5.2702	5.5839	5.3457	5.65	6.2345	5.8408	5.1152	3.9546	5.5735	5.9536	5.0328	4.8609	6.0146	10
	5.0088	6.1509	5.5653	6.6815	5.9663	6.2383	5.6352	5.2536	6.3496	5.4455	5.8669	5.6796	5.1522	6.2739	5.4079	6.3055	7.4895	5.9697	6.6147	5.3168	5.8387	11
	4.9895	3.7626	5.4359	5.2621	5.685	5.25	5.4481	5.8783	3.7692	5.3681	4.9659	5.3163	3.9795	5.0747	6.2547	4.233	3.9888	5.5648	4.9126	5.8517	5.4929	12
	OLF	CP	LV	WM	HIP	CA/RSP	3V	VIS	SS	PCS	AUD	4V	TH	HY	HAB	PERI	MB	HB	PAG	CB	CoW
STATISTICS	Mann-Whitney U-test p-value (GraphPad Prism 9.4.1)																					Mann-Whitney U p-value	LEGEND:
	0.0931	0.5887	0.5887	0.9372	0.6991	0.9372	0.9372	>0.9999	>0.9999	0.8182	0.6991	0.6991	0.8182	0.9372	0.4848	0.4848	0.8182	0.3939	0.4848	>0.9999	0.5887		p<0.05
																						AQP4 (+/+)
	4.55512	4.8405	5.43802	5.43197	5.62188	5.00247	5.49915	5.17767	5.06265	5.49278	5.4694	5.48717	5.28112	5.36362	4.84753	5.46515	5.03515	5.8698	5.46773	5.21568	5.83965	MEAN
	0.520934	0.407872	0.106878	0.644018	0.969449	1.05871	0.147544	1.11753	1.46374	0.398911	1.12268	0.174231	1.22222	0.893181	1.71791	0.953634	1.40218	1.15125	0.342476	1.16714	0.620159	SD
																						AQP4 (-/-)
	4.94483	5.11903	5.48242	5.51462	5.42765	5.11053	5.5048	5.23373	5.1691	5.3172	5.42922	5.50238	5.11503	5.53355	5.49647	5.0692	5.55717	5.27658	5.40628	5.11955	5.64337	MEAN
	0.362549	0.989486	0.156747	0.639909	1.20884	0.779402	0.177992	0.480112	1.04171	0.223005	0.478161	0.181413	0.719513	0.717769	0.781614	1.02501	1.17335	0.724153	0.711733	0.919107	0.333268	SD
	Fp values computed from 21 ROI																							AVERAGE Fp-IVIM
	OLF	CP	LV	WM	HIP	CA/RSP	3V	VIS	SS	PCS	AUD	4V	TH	HY	HAB	PERI	MB	HB	PAG	CB	CoW	Animal code
AQP4(+/+)	6.6393	7.5478	25.7979	8.6576	6.2909	8.9357	29.0735	6.4163	6.5567	28.3214	5.9172	24.6612	6.0896	6.9575	9.8281	6.4125	7.2716	5.6	6.0058	5.6254	22.0882	1
	3.0016	3.5733	21.6318	6.1747	3.9852	4.009	19.1798	3.1281	4.0503	13.1118	3.289	14.6879	3.3309	2.3589	11.2564	2.2563	4.0288	4.4211	5.2835	3.3853	12.4414	2
	2.3708	3.6729	21.1966	4.8167	3.1812	5.57	19.9175	3.5665	3.1511	13.9076	3.0686	17.2724	3.5025	3.4626	7.8713	2.9978	5.0005	5.2701	5.3591	3.0675	9.9117	3
	2.0945	3.97	20.432	8.4508	3.7122	3.7668	20.7443	3.9208	3.6559	17.8402	3.6117	18.2689	4.5118	4.8962	6.9066	4.0603	3.4065	5.5791	4.1951	2.7096	10.8021	4
	2.0551	4.5243	22.3654	9.3142	3.3184	5.4675	19.6936	5.5323	4.1619	17.5778	3.6029	15.8427	4.7827	4.294	4.8294	3.7857	3.5759	3.6667	3.7857	4.2625	11.543	5
	2.502	2.6506	23.4734	6.7399	3.4811	3.7336	21.8598	4.8923	3.2312	19.342	3.5572	21.3321	4.051	4.4468	7.4594	3.0548	3.4711	3.4409	3.3373	2.726	13.5032	6
AQP4(-/-)	4.3381	4.3004	25.4258	7.2552	4.2127	3.4946	24.6841	3.7399	3.8878	18.8447	3.3896	18.5779	3.1819	3.7656	11.1791	2.731	4.5733	3.8565	3.9638	1.9326	14.7326	7
	2.8157	3.5019	22.8336	6.5123	3.8171	4.6348	20.1295	4.5689	3.991	17.2527	2.8752	20.2729	4.0545	5.1985	11.7838	3.673	3.9418	4.047	3.974	2.5942	11.9058	8
	2.1304	2.7431	20.9901	6.6633	2.798	4.2276	21.0367	3.9358	3.2762	11.9586	3.0299	16.5256	3.6732	3.3711	13.685	2.8046	3.9278	3.81	4.6659	2.266	11.1999	9
	3.3602	3.8925	24.075	5.9924	3.6607	4.6972	20.2208	4.359	4.0852	15.0332	3.785	19.65	4.19	4.7572	6.0967	2.873	4.0691	3.3916	5.5325	2.3828	13.1685	10
	3.0876	5.102	23.9824	6.7406	3.7957	5.2153	23.6942	3.6184	4.5028	22.1044	4.1598	18.4288	4.6173	5.5469	6.9391	4.148	5.3862	5.1953	5.2477	3.6332	14.8271	11
	3.1207	3.0084	22.4969	8.5761	3.8958	5.0746	22.617	3.9793	3.6905	13.0274	3.5475	12.6231	4.034	3.8384	4.438	3.1532	5.0906	4.3196	4.4556	2.9338	12.6196	12
	OLF	CP	LV	WM	HIP	CA/RSP	3V	VIS	SS	PCS	AUD	4V	TH	HY	HAB	PERI	MB	HB	PAG	CB	CoW
STATISTICS	Mann-Whitney U-test p-value (GraphPad Prism 9.4.1)																					Mann-Whitney U p-value	LEGEND:
	0.2403	0.6991	0.3939	0.6991	0.8182	0.6991	0.3095	0.8182	0.8182	0.4848	0.5887	>0.9999	0.5887	0.9372	0.8182	0.5887	0.3939	0.3095	>0.9999	0.0649	0.4848		p<0.05
																						AQP4 (+/+)
	3.11055	4.32315	22.4828	7.35898	3.99483	5.2471	21.7447	4.57605	4.13452	18.3501	3.8411	18.6775	4.37808	4.40267	8.0252	3.76123	4.45907	4.66298	4.66108	3.62938	13.3816	MEAN
	1.76226	1.69388	1.92714	1.72918	1.16064	1.98864	3.71079	1.26064	1.25594	5.44872	1.0394	3.71338	1.00808	1.53917	2.25829	1.44679	1.50017	0.962334	1.04103	1.13334	4.44473	SD
																						AQP4 (-/-)
	3.14212	3.75805	23.3006	6.95665	3.69667	4.55735	22.0637	4.03355	3.90558	16.3702	3.4645	17.6797	3.95848	4.41295	9.02028	3.23047	4.49813	4.10333	4.63992	2.62377	13.0756	MEAN
	0.722701	0.869038	1.53515	0.891258	0.477316	0.626765	1.89859	0.364306	0.409616	3.80019	0.476406	2.7884	0.487243	0.878187	3.686	0.566089	0.626767	0.615771	0.64828	0.596611	1.47761	SD
	Fp x D* values computed from 21 ROI																							AVERAGE Fp x D*-IVIM
	OLF	CP	LV	WM	HIP	CA/RSP	3V	VIS	SS	PCS	AUD	4V	TH	HY	HAB	PERI	MB	HB	PAG	CB	CoW	Animal code
AQP4(+/+)	35.383	43.7377	141.335	58.6888	48.1035	59.2809	168.582	35.9242	36.1294	154.089	42.0356	135.956	43.0469	49.6636	67.507	33.6112	44.3779	30.489	36.349	31.0558	120.25	1
	12.3597	16.0395	111.951	33.5459	19.2911	15.4523	100.116	15.9348	14.4785	69.13	16.8065	75.2853	13.7909	11.1824	63.6713	8.5931	18.1159	20.1955	28.2527	13.639	64.2504	2
	14.5408	22.1488	117.747	30.5851	19.7492	37.6598	109.318	20.5154	23.0779	69.8468	17.3695	94.6371	22.1095	18.9584	40.7038	16.0317	35.4277	32.5283	33.2901	21.4502	72.8348	3
	9.3883	23.2526	107.563	44.7607	21.1139	21.2671	109.401	17.678	17.3701	89.5764	16.6992	96.7266	23.1236	28.1126	30.7912	23.0382	22.8528	34.377	25.6597	12.2239	55.1511	4
	9.9657	22.3848	117.569	49.2667	18.3223	19.2728	100.31	29.4686	18.0381	91.8739	22.9216	80.7004	29.7119	26.2802	16.8178	24.1928	16.3112	25.5677	24.8151	27.108	69.4107	5
	11.0447	11.0453	127.803	45.9318	26.8694	22.1366	118.012	34.8628	20.9781	100.808	26.6385	116.947	29.3019	28.1168	51.4493	24.3917	10.9283	30.267	19.43	22.0868	87.8431	6
AQP4(-/-)	19.6419	22.1984	131.403	35.8923	18.7088	18.1519	125.849	19.9385	18.4179	92.7349	16.6517	95.0715	19.4678	16.8575	56.9744	12.3571	24.1837	17.9861	19.2847	7.6263	74.5665	7
	18.1298	15.4638	118.889	37.857	32.2627	18.5097	107.635	26.8097	24.1361	89.7122	16.9282	112.544	19.4712	36.8322	65.1775	21.1015	17.8852	21.2094	25.729	14.1264	68.1314	8
	10.9028	13.8761	118.279	39.7241	16.8024	25.3978	115.91	19.2916	17.7299	63.7814	17.531	86.729	23.5755	19.7755	72.0983	20.0208	25.5289	23.3706	27.7402	19.62	66.0163	9
	17.9053	25.564	133.636	42.5151	18.5837	23.529	107.723	27.4415	22.4156	82.7863	22.2064	104.856	27.4498	32.2117	31.7279	11.1245	23.8118	21.3786	28.3251	12.7707	75.4308	10
	16.5256	32.8193	132.049	49.2387	27.2006	33.8175	123.358	20.7628	34.2488	117.95	28.7898	103.078	26.7248	37.9645	39.8544	27.9715	45.4364	33.3366	35.7613	22.3936	86.4383	11
	14.9364	11.6859	121.631	44.1191	25.2449	29.6283	122.522	23.4695	13.34	67.0148	19.4028	55.7373	16.4504	25.9806	30.5104	14.0441	20.8423	25.8566	24.1213	19.2084	71.9333	12
	OLF	CP	LV	WM	HIP	CA/RSP	3V	VIS	SS	PCS	AUD	4V	TH	HY	HAB	PERI	MB	HB	PAG	CB	CoW
STATISTICS	Mann-Whitney U-test p-value (GraphPad Prism 9.4.1)																					Mann-Whitney U p-value	LEGEND:
	0.1797	0.8182	0.1797	0.5887	0.8182	>0.9999	0.4848	0.8182	0.9372	0.5887	0.8182	0.9372	0.3939	0.8182	0.8182	0.3939	0.4848	0.2403	0.8182	0.3095	0.9372		p<0.05
																						AQP4 (+/+)
	15.447	23.1014	120.661	43.7965	25.5749	29.1783	117.623	25.7306	21.6787	95.8873	23.7451	100.042	26.8474	27.0523	45.1567	21.6431	24.669	28.9041	27.9661	21.2606	78.29	MEAN
	9.93911	11.1581	12.1976	10.3616	11.4467	16.594	25.8449	8.8236	7.68026	31.1822	9.81865	22.8157	9.83301	12.8957	19.551	8.49739	12.7208	5.18514	6.1125	7.35673	23.2078	SD
																						AQP4 (-/-)
	16.3403	20.2679	125.981	41.5577	23.1338	24.839	117.166	22.9523	21.7147	85.6632	20.2517	93.0027	22.1899	28.2703	49.3905	17.7699	26.2814	23.8563	26.8269	15.9576	73.7528	MEAN
	3.10238	8.08577	7.11821	4.80893	6.07788	6.1702	8.05003	3.53773	7.21583	19.7163	4.6658	20.2792	4.42481	8.83713	17.7862	6.44329	9.77813	5.32386	5.44633	5.44652	7.1995	SD

## Sheet: Average ADC to D correlation
							PARENCHYMAL ROI
region	ADC	D		PEARSON's correlation				AQP4 (+/+)				AQP4 (-/-)
OLF	0.5048	0.4943		r=				region	ADC	D		region	ADC	D
CP	0.5136	0.5038		0.940001				OLF	0.5048	0.4943		OLF	0.5282	0.5075
LV	1.8699	0.9342						CP	0.5136	0.5038		CP	0.5401	0.5267			regions of main differences in both average ADC and D
WM	0.4988	0.4771						WM	0.4988	0.4771		WM	0.5306	0.5018
HIP	0.5374	0.5294						HIP	0.5374	0.5294		HIP	0.5656	0.5558
CA/RSP	0.5112	0.4999						CA/RSP	0.5112	0.4999		CA/RSP	0.5221	0.5132
3V	1.9019	0.8433						VIS	0.4755	0.4708		VIS	0.5007	0.4932
VIS	0.4755	0.4708						SS	0.5047	0.4976		SS	0.5309	0.5238
SS	0.5047	0.4976						AUD	0.5088	0.5034		AUD	0.5342	0.5257
PCS	0.9429	0.7411						TH	0.5122	0.5034		TH	0.5448	0.5326
AUD	0.5088	0.5034						HY	0.5667	0.5534		HY	0.576	0.5596
4V	0.8794	0.6881						HAB	0.5907	0.5479		HAB	0.5918	0.5469
TH	0.5122	0.5034						PERI	0.5243	0.5143		PERI	0.5388	0.5295
HY	0.5667	0.5534						MB	0.5049	0.4968		MB	0.5352	0.5218
HAB	0.5907	0.5479						HB	0.5116	0.4997		HB	0.5603	0.5436
PERI	0.5243	0.5143						PAG	0.5455	0.5303		PAG	0.5684	0.5481
MB	0.5049	0.4968						CB	0.467	0.4581		CB	0.4673	0.4635
HB	0.5116	0.4997
PAG	0.5455	0.5303						MEAN	0.517356	0.505012			0.539687	0.524581
CB	0.467	0.4581						SD	0.0309258	0.0257549			0.0298814	0.0249966
CoW	0.7042	0.5742
OLF	0.5282	0.5075						MEAN	0.5115	0.5014			0.542712	0.528975
CP	0.5401	0.5267						SD	0.0115517	0.0142766			0.0134137	0.015943
LV	1.848	0.8871
WM	0.5306	0.5018						Range of parenchymal ADC and D difference between the genotypes from ~5.5 to ~6.1 % (~1.5% SD), (8 or 10 most significant regions included). Mean value of ~5.7 % and ~1.5% SD reported.
HIP	0.5656	0.5558
CA/RSP	0.5221	0.5132
3V	1.927	0.7598
VIS	0.5007	0.4932
SS	0.5309	0.5238
PCS	0.8825	0.6964
AUD	0.5342	0.5257
4V	0.8034	0.6396
TH	0.5448	0.5326
HY	0.576	0.5596
HAB	0.5918	0.5469
PERI	0.5388	0.5295
MB	0.5352	0.5218
HB	0.5603	0.5436
PAG	0.5684	0.5481
CB	0.4673	0.4635
CoW	0.6669	0.5518

## Sheet: Z-direction MR DIFFUSION SCORES
	ADC values computed from 21 ROI																							ADC
	OLF	CP	LV	WM	HIP	CA/RSP	3V	VIS	SS	PCS	AUD	4V	TH	HY	HAB	PERI	MB	HB	PAG	CB	CoW	Animal code
AQP4(+/+)	0.4728	0.5033	1.7503	0.5538	0.4944	0.5397	1.7354	0.4554	0.4553	1.2266	0.458	1.6175	0.4981	0.5704	0.779	0.5428	0.4221	0.4525	0.5196	0.4202	1.04	1
	0.4683	0.4995	1.7554	0.555	0.4664	0.4477	1.727	0.4182	0.4158	1.0806	0.434	1.2795	0.4658	0.526	0.7647	0.5128	0.4031	0.4411	0.52	0.3872	0.7719	2
	0.473	0.4989	1.6159	0.4558	0.5052	0.4691	1.5979	0.382	0.4295	0.852	0.44	1.5391	0.4647	0.5095	0.6162	0.5246	0.3708	0.4147	0.522	0.3887	0.483	3
	0.4735	0.4759	1.5242	0.5044	0.4983	0.4849	1.7296	0.4201	0.4165	1.2208	0.443	1.5095	0.4725	0.554	0.6639	0.532	0.4191	0.4281	0.515	0.3927	0.6532	4
	0.4436	0.4948	1.5307	0.5124	0.5009	0.4764	1.5802	0.4342	0.4266	1.2584	0.446	1.6136	0.4784	0.5422	0.5876	0.5704	0.3901	0.4334	0.517	0.4302	0.8085	5
	0.4864	0.4827	1.709	0.4883	0.4766	0.4597	1.7002	0.4041	0.4083	1.2095	0.4385	1.5299	0.4629	0.5302	0.57	0.5558	0.4064	0.4197	0.5	0.4064	0.7003	6
AQP4(-/-)	0.553	0.5109	1.5954	0.498	0.5069	0.4978	1.5882	0.4286	0.4253	1.0392	0.45	1.6096	0.4827	0.5714	0.7852	0.5091	0.4089	0.5081	0.53	0.4106	0.8134	7
	0.4798	0.5053	1.4675	0.4739	0.4951	0.4385	1.6173	0.3953	0.4216	0.9686	0.443	1.5327	0.4901	0.5276	0.6832	0.5055	0.3901	0.4342	0.52	0.3735	0.6235	8
	0.5347	0.5118	1.7419	0.5051	0.5211	0.4869	1.6277	0.4464	0.4483	0.9042	0.47	1.4236	0.507	0.5503	0.696	0.5326	0.4215	0.4453	0.519	0.363	0.6139	9
	0.5158	0.5131	1.6663	0.5231	0.5251	0.497	1.7765	0.4234	0.448	1.2754	0.475	1.6005	0.5053	0.5475	0.6158	0.5806	0.4208	0.5043	0.56	0.4262	0.8243	10
	0.54	0.5536	1.5628	0.4785	0.5111	0.4801	1.6808	0.368	0.4354	1.0627	0.4682	1.4194	0.4994	0.5289	0.551	0.5453	0.445	0.4575	0.55	0.3922	0.7211	11
	0.4985	0.5439	1.5625	0.5822	0.5487	0.4993	1.7698	0.4733	0.4653	1.1472	0.483	1.68	0.5117	0.5727	0.5667	0.5807	0.4368	0.4832	0.56	0.3936	0.8349	12
	OLF	CP	LV	WM	HIP	CA/RSP	3V	VIS	SS	PCS	AUD	4V	TH	HY	HAB	PERI	MB	HB	PAG	CB	CoW
STATISTICS	Mann-Whitney U-test p-value (GraphPad Prism 9.4.1)																					Mann-Whitney U p-val	LEGEND:
	0.004329	0.002165	0.4848	0.9372	0.0152	0.3939	0.9372	0.8182	0.1797	0.3939	0.0173	0.9372	0.008658	0.3939	0.8182	0.9372	0.1429	0.0152	0.0303	0.58875	0.8182		p<0.05
																						AQP4 (+/+)
	0.4696	0.492517	1.64758	0.511617	0.4903	0.479583	1.67838	0.419	0.425333	1.14132	0.44325	1.51485	0.473733	0.538717	0.663567	0.539733	0.401933	0.431583	0.5156	0.404233	0.742817	MEAN
	0.0141205	0.0108027	0.105675	0.0384016	0.0153237	0.032169	0.0704715	0.0250953	0.0165892	0.154492	0.00829307	0.12371	0.0132585	0.0216213	0.0898022	0.0210818	0.0191416	0.0139267	0.00802496	0.0178792	0.184836	SD
																						AQP4 (-/-)
	0.5203	0.5231	1.5994	0.510133	0.518	0.483267	1.67672	0.4225	0.44065	1.06622	0.464867	1.5443	0.499367	0.549733	0.64965	0.5423	0.420517	0.4721	0.539833	0.393183	0.738517	MEAN
	0.0275698	0.0202793	0.0947593	0.0396177	0.0184268	0.0231697	0.080506	0.0371482	0.0164089	0.131785	0.0152849	0.105962	0.0110384	0.0196272	0.0887762	0.0331693	0.0196252	0.0310608	0.0191877	0.023208	0.101309	SD
	D values computed from 21 ROI																							D-IVIM
	OLF	CP	LV	WM	HIP	CA/RSP	3V	VIS	SS	PCS	AUD	4V	TH	HY	HAB	PERI	MB	HB	PAG	CB	CoW	Animal code
AQP4(+/+)	0.4429	0.4786	0.8643	0.4962	0.4808	0.4937	0.807	0.4469	0.437	0.7359	0.4456	0.8189	0.4698	0.5341	0.5829	0.5144	0.401	0.434	0.4941	0.4073	0.6273	1
	0.4529	0.4957	0.7831	0.5027	0.4545	0.4455	0.7226	0.4086	0.415	0.583	0.426	0.7386	0.4627	0.5103	0.5166	0.4951	0.399	0.4306	0.4869	0.3841	0.5072	2
	0.4526	0.4788	0.6743	0.4133	0.4971	0.4547	0.6303	0.3766	0.42	0.5407	0.4334	0.6939	0.4538	0.5023	0.5224	0.5063	0.364	0.4103	0.4917	0.3767	0.4005	3
	0.4653	0.4623	0.7082	0.4472	0.4892	0.4718	0.7251	0.4194	0.412	0.5822	0.4367	0.6735	0.4666	0.5261	0.5205	0.507	0.407	0.4147	0.4949	0.3906	0.4414	4
	0.4409	0.4869	0.7391	0.4798	0.5022	0.4742	0.7278	0.4322	0.43	0.612	0.4464	0.7113	0.4763	0.5327	0.5775	0.5645	0.393	0.4363	0.5141	0.4342	0.5007	5
	0.4835	0.4801	0.7558	0.4459	0.4715	0.4624	0.6838	0.4039	0.4076	0.5937	0.4363	0.7003	0.4616	0.5229	0.5322	0.5458	0.409	0.4155	0.4951	0.4072	0.4554	6
AQP4(-/-)	0.5314	0.4946	0.7645	0.4642	0.4998	0.4926	0.6642	0.428	0.426	0.6478	0.4422	0.713	0.4792	0.5637	0.5982	0.502	0.41	0.4966	0.5217	0.4099	0.5358	7
	0.4599	0.4981	0.6997	0.4488	0.4883	0.4311	0.6691	0.3969	0.42	0.591	0.4396	0.6957	0.4843	0.5118	0.5317	0.4894	0.39	0.4283	0.4957	0.3697	0.4534	8
	0.493	0.5057	0.7043	0.4767	0.5167	0.4812	0.7254	0.429	0.444	0.5664	0.4615	0.7084	0.5011	0.5399	0.5569	0.5209	0.418	0.4437	0.4998	0.362	0.469	9
	0.5012	0.501	0.7296	0.4697	0.5172	0.4952	0.6913	0.4215	0.45	0.5933	0.4688	0.6853	0.4936	0.526	0.5445	0.565	0.414	0.4958	0.5265	0.4296	0.5169	10
	0.4897	0.535	0.7224	0.4568	0.509	0.4728	0.7051	0.367	0.436	0.5799	0.4681	0.6698	0.496	0.5162	0.5142	0.5412	0.445	0.4596	0.5337	0.3943	0.5132	11
	0.4733	0.5189	0.7168	0.4897	0.5255	0.485	0.7419	0.4647	0.4594	0.5857	0.4704	0.6868	0.4895	0.5546	0.5519	0.5596	0.425	0.4694	0.5341	0.3864	0.5263	12
	OLF	CP	LV	WM	HIP	CA/RSP	3V	VIS	SS	PCS	AUD	4V	TH	HY	HAB	PERI	MB	HB	PAG	CB	CoW
STATISTICS	Mann-Whitney U-test p-value (GraphPad Prism 9.4.1)																					Mann-Whitney U p-value	LEGEND:
	0.0152	0.0043	0.3939	0.937229	0.026	0.3095	0.6991	0.9372	0.0455	0.8182	0.026	0.3095	0.0022	0.3095	0.699134	0.8182	0.0411	0.0152	0.0087	0.699134	0.3095		p<0.05
																						AQP4 (+/+)
	0.45635	0.4804	0.754133	0.464183	0.48255	0.46705	0.7161	0.4146	0.420267	0.607917	0.4374	0.72275	0.465133	0.5214	0.542017	0.522183	0.3955	0.423567	0.496133	0.400017	0.48875	MEAN
	0.0158921	0.0110439	0.0658601	0.0345378	0.0176296	0.0168669	0.0581857	0.0243745	0.0112368	0.066931	0.00769285	0.0517475	0.00768731	0.0126597	0.0300688	0.0269271	0.0164651	0.0113151	0.0093213	0.020779	0.0785132	SD
																						AQP4 (-/-)
	0.491417	0.508883	0.722883	0.46765	0.509417	0.476317	0.6995	0.41785	0.439233	0.594017	0.458433	0.693167	0.490617	0.535367	0.549567	0.529683	0.417	0.465567	0.518583	0.391983	0.502433	MEAN
	0.0245819	0.0153296	0.0232255	0.0145414	0.0134972	0.0235707	0.0307812	0.0330461	0.014838	0.0280478	0.0139408	0.0160016	0.00799085	0.020994	0.0283553	0.0307934	0.0180887	0.0275477	0.0168412	0.0251718	0.0332572	SD
	D* values computed from 21 ROI																							D*-IVIM
	OLF	CP	LV	WM	HIP	CA/RSP	3V	VIS	SS	PCS	AUD	4V	TH	HY	HAB	PERI	MB	HB	PAG	CB	CoW	Animal code
AQP4(+/+)	6.4139	4.1097	5.3593	4.6904	6.8683	6.4989	5.525	6.2185	7.4262	6.3426	6.3426	5.484	5.8493	6.0195	6.3579	3.9352	5.0618	5.2803	5.1585	5.7237	5.0202	1
	4.6409	3.1651	5.24	4.795	3.7182	6.4692	5.2719	4.9085	4.7634	5.5172	5.6055	5.2411	6.4704	3.7006	4.1643	4.694	5.8717	4.6839	4.8455	3.7824	5.5613	2
	4.6047	5.3121	5.0409	4.9474	5.946	4.6873	5.1058	5.6594	3.735	4.9542	4.9542	5.2482	7.2209	5.1033	7.0414	4.2844	8.0378	8.0952	5.6463	5.0648	6.4374	3
	4.1253	5.4519	5.237	4.9058	6.2568	5.3592	5.1467	8.1574	6.8	5.2896	5.2896	5.4847	6.3467	5.1832	4.6019	4.3096	6.154	7.2677	5.9859	7.7903	5.7536	4
	4.8105	5.1886	5.1368	4.5404	2.967	5.256	5.2061	5.6465	3.9955	4.7406	4.5816	5.4051	3.3719	6.4759	4.0022	4.121	5.0224	4.5523	7.6422	6.2587	6.4521	5
	4.2403	4.2351	5.1144	4.944	4.2857	4.7201	5.1408	5.5559	3.5876	4.4239	4.4091	5.3342	5.8041	6.1432	4.4518	3.9321	4.6298	6.5732	7.006	7.3645	6.4569	6
AQP4(-/-)	4.3132	6.4495	5.187	6.9226	4.9236	7.6312	5.1098	5.9738	6.163	5.6788	5.6851	5.2426	5.8943	6.2412	4.396	5.2473	7.7506	6.4584	5.0247	7.7354	5.7409	7
	5.3618	4.5461	5.057	5.0855	7.344	7.261	5.1002	5.227	6.1106	6.8638	7.1406	5.4475	6.7044	4.058	4.889	4.7139	8.0916	6.6956	4.8479	3.3244	5.0603	8
	6.262	4.8779	5.5453	5.9966	6.1276	7.014	5.2535	4.9802	5.336	5.1854	5.2171	5.7448	5.5519	6.1583	4.759	5.8509	4.7994	5.4545	5.0706	5.8618	5.838	9
	6.0567	5.183	5.4014	5.5951	7.2654	7.9838	5.5355	6.565	9.5657	6.395	6.4486	5.5917	6.898	6.4602	8.2985	5.3253	4.8882	6.2754	5.1788	8.4943	6.5452	10
	4.2579	7.7738	5.2797	6.8733	6.2066	5.3807	5.3016	5.2029	6.5173	7.4606	7.4088	5.4164	6.2946	6.2309	6.353	6.3286	7.4052	8.5668	7.2472	7.6724	6.2002	11
	4.7517	4.6017	5.3424	5.3559	6.2242	6.0683	5.3472	4.9827	4.2237	4.8783	4.8783	5.2953	4.4194	5.7013	5.5716	5.0895	4.8514	5.447	5.3518	5.4481	6.463	12
	OLF	CP	LV	WM	HIP	CA/RSP	3V	VIS	SS	PCS	AUD	4V	TH	HY	HAB	PERI	MB	HB	PAG	CB	CoW
STATISTICS	Mann-Whitney U-test p-value (GraphPad Prism 9.4.1)																					Mann-Whitney U p-value	LEGEND:
	0.484848	0.393939	0.24026	0.0021645	0.179654	0.025974	0.699134	0.484848	0.309524	0.132035	0.132035	0.484848	>0.9999	0.393939	0.393939	0.0021645	0.937229	0.588745	0.393939	0.699134	0.699134		p<0.05
																						AQP4 (+/+)
	4.80593	4.57708	5.18807	4.80383	5.007	5.49845	5.23272	6.02437	5.05128	5.21135	5.1971	5.36622	5.84388	5.43762	5.10325	4.21272	5.79625	6.07543	6.0474	5.9974	5.94692	MEAN
	0.829037	0.895389	0.113248	0.163094	1.56531	0.810583	0.154679	1.125	1.65956	0.676344	0.713625	0.109572	1.31559	1.01076	1.27281	0.286472	1.2375	1.45858	1.08274	1.48342	0.600124	SD
																						AQP4 (-/-)
	5.16722	5.572	5.30213	5.9715	6.34857	6.88983	5.27463	5.4886	6.31938	6.07698	6.12975	5.45638	5.96043	5.80832	5.71118	5.42592	6.29773	6.48295	5.4535	6.42273	5.9746	MEAN
	0.86677	1.28413	0.169973	0.777702	0.88842	0.985086	0.162535	0.641642	1.78912	1.00249	1.03501	0.186989	0.90446	0.893137	1.44485	0.575781	1.60493	1.14562	0.894471	1.92044	0.552129	SD
	Fp values computed from 21 ROI																							Fp-IVIM
	OLF	CP	LV	WM	HIP	CA/RSP	3V	VIS	SS	PCS	AUD	4V	TH	HY	HAB	PERI	MB	HB	PAG	CB	CoW	Animal code
AQP4(+/+)	8.2155	8.2998	27.7677	10.2028	5.5786	8.3498	28.0626	6.1002	7.0409	24.4058	5.7393	23.9642	7.6994	8.0858	11.8857	5.8297	7.1499	5.9908	7.2237	5.2312	21.5702	1
	5.0698	5.0897	24.2042	10.6662	6.4993	6.3026	22.7886	6.9672	4.6082	17.4163	5.8627	17.9757	6.2877	6.5403	12.65	5.0063	5.8108	7.4606	8.1913	3.4547	15.6514	2
	4.8191	5.6389	23.3916	7.62	4.4072	7.6537	20.8796	6.4235	5.0795	16.9923	5.0704	21.3272	5.454	3.6454	7.801	4.6562	6.2853	6.4957	7.0792	5.5484	11.8922	3
	3.6199	6.0795	23.0643	10.0936	6.1543	7.6203	22.5052	5.7646	5.337	21.8748	4.8973	21.3622	6.34	7.735	8.3949	6.1965	7.4322	7.929	5.9124	5.062	14.4856	4
	3.7077	6.3419	20.4777	8.3173	5.1551	5.369	18.6355	5.3046	4.9108	15.0422	4.9139	19.1095	5.0293	6.2199	8.0658	4.852	4.7265	5.6679	4.0439	5.537	15.3059	5
	3.5708	6.1561	21.6361	10.17	4.3328	2.7149	21.8422	5.8891	4.2713	17.1814	4.97	19.7909	4.2122	4.412	9.5839	4.5359	3.9055	4.7233	3.4906	3.727	14.1237	6
AQP4(-/-)	4.8365	5.1051	24.1585	7.7201	3.9419	5.0949	19.9383	4.7979	4.0676	16.7321	4.1609	17.9337	2.721	4.2695	12.4161	3.3106	4.0027	5.3453	4.8896	0.9319	15.1154	7
	3.927	6.2395	23.5641	8.6212	6.1311	8.0322	22.0976	6.908	7.0913	17.1413	4.6946	22.288	4.9598	6.7438	9.869	5.5476	5.9052	4.9607	6.3369	4.2437	15.3707	8
	4.6219	4.3219	21.2999	8.6401	4.3833	4.6641	21.1711	6.1624	4.774	12.5102	4.9373	16.3722	5.5551	6.6154	8.9927	4.1233	5.2744	4.4375	5.8991	4.7897	13.5671	9
	4.6	6.4259	25.8618	11.7419	7.1411	8.0041	24.6152	6.8001	6.1588	20.9313	5.4352	23.4622	7.2506	7.8056	11.5547	5.7561	9.2157	7.299	7.8665	4.5443	18.3672	10
	3.9777	6.1321	23.936	9.6149	4.7403	7.1876	23.3287	5.7096	6.7985	20.3062	5.7209	22.1154	6.1572	6.1367	7.8012	5.2424	5.6487	5.7471	7.1671	4.6761	13.5786	11
	4.6984	5.8856	23.4553	10.8389	6.3675	7.2233	22.8096	5.3527	6.4881	13.7423	5.606	17.5922	7.285	6.0894	6.2639	4.8757	6.8041	5.2784	5.9015	5.4054	16.008	12
	OLF	CP	LV	WM	HIP	CA/RSP	3V	VIS	SS	PCS	AUD	4V	TH	HY	HAB	PERI	MB	HB	PAG	CB	CoW
STATISTICS	Mann-Whitney U-test p-value (GraphPad Prism 9.4.1)																					Mann-Whitney U p-value	LEGEND:
	0.937229	0.699134	0.588745	0.937229	>0.9999	>0.9999	0.699134	0.818182	0.484848	0.309524	0.588745	0.699134	0.937229	>0.9999	0.937229	0.699134	>0.9999	0.179654	>0.9999	0.393939	0.937229		p<0.05
																						AQP4 (+/+)
	4.8338	6.26765	23.4236	9.51165	5.35455	6.33505	22.4523	6.07487	5.20795	18.8188	5.24227	20.5883	5.8371	6.1064	9.73022	5.17943	5.88503	6.37788	5.99018	4.76005	15.5048	MEAN
	1.77925	1.09233	2.50935	1.23187	0.892354	2.07315	3.13065	0.573155	0.971408	3.54403	0.438742	2.10665	1.21357	1.77195	2.07209	0.675628	1.3726	1.18184	1.87587	0.928379	3.25107	SD
																						AQP4 (-/-)
	4.44358	5.68502	23.7126	9.52952	5.45087	6.70103	22.3268	5.95512	5.89638	16.8939	5.09248	19.9606	5.65478	6.27673	9.48293	4.80928	6.1418	5.51133	6.34345	4.09852	15.3345	MEAN
	0.389739	0.811279	1.46814	1.517	1.27133	1.46344	1.64723	0.827923	1.20539	3.38175	0.604368	2.99718	1.70626	1.16224	2.30111	0.932759	1.76152	0.978721	1.04924	1.59791	1.78365	SD
	Fp x D* values computed from 21 ROI																							Fp x D*-IVIM
	OLF	CP	LV	WM	HIP	CA/RSP	3V	VIS	SS	PCS	AUD	4V	TH	HY	HAB	PERI	MB	HB	PAG	CB	CoW	Animal code
AQP4(+/+)	50.6154	42.8985	149.502	53.1233	41.0182	54.4553	150.058	36.3219	45.4768	122.745	39.3699	127.592	44.4139	49.5574	77.8403	22.9741	40.5137	36.9971	37.9944	38.3492	113.552	1
	22.6588	18.7503	120.084	57.3777	28.3368	44.8787	113.598	37.4247	20.4313	99.099	34.0294	95.6613	37.2214	24.7322	58.6623	25.5146	28.7417	42.0037	41.1148	18.0575	79.2588	2
	22.0842	30.3336	113.681	41.4432	33.4028	39.8217	96.0003	43.1083	21.2592	83.3458	29.561	104.925	41.5431	17.3626	77.6367	20.8051	53.7096	44.9807	41.8077	30.3746	78.0508	3
	20.2084	37.9184	118.929	52.153	42.2338	45.9501	112.528	42.7234	43.5942	105.653	26.6357	114.493	37.9098	40.9106	41.5555	26.1044	51.9501	58.5824	37.9334	41.3221	77.5441	4
	22.0419	33.8215	102.549	43.294	20.4707	27.2026	89.7364	30.5597	19.6649	69.056	25.42	96.7041	14.9307	38.1183	36.2449	20.0234	19.2501	28.7714	35.0745	37.8003	88.43	5
	21.7656	29.9858	105.281	51.4022	20.8185	9.7721	102.896	35.5531	19.2262	87.6763	28.2012	105.874	26.7106	24.5548	41.7629	20.7308	8.5991	26.5955	22.1006	32.5615	83.0722	6
AQP4(-/-)	22.5797	32.8407	122.483	44.9745	17.8125	36.1785	97.1957	31.42	22.8093	85.3675	23.0154	91.2524	17.8848	20.4145	68.5574	19.4499	33.5947	31.5831	26.4863	9.1667	87.3647	7
	24.1077	25.0287	118.728	41.044	38.7294	61.1593	108.629	31.4169	41.1861	79.3064	33.2619	115.981	31.2835	33.6043	52.476	21.8038	47.8905	29.4895	29.7122	15.1442	79.4746	8
	30.3309	20.9927	114.569	60.157	26.126	33.8586	105.918	30.4236	25.5277	64.4512	25.5746	91.2212	29.1487	39.6279	53.1401	22.9939	31.0199	25.8179	29.0578	33.623	74.1456	9
	25.8051	34.3672	138.5	72.2532	55.7658	61.5999	131.972	40.9619	57.3201	110.749	32.3721	124.381	43.5786	50.3917	101.488	35.8882	45.051	48.3649	48.4891	37.6189	125.871	10
	18.2721	43.0236	126.99	63.4563	36.8809	35.6117	106.697	31.8713	53.8344	117.475	36.3499	116.862	38.6228	40.7762	42.1428	30.0449	44.3796	53.6269	51.9295	46.6202	83.2744	11
	22.5242	28.8265	123.576	66.1426	46.8973	49.5775	114.375	22.6989	28.8851	70.8896	32.247	86.4979	35.3925	38.1612	48.4657	21.2121	35.1169	32.7478	32.46	29.6938	99.5544	12
	OLF	CP	LV	WM	HIP	CA/RSP	3V	VIS	SS	PCS	AUD	4V	TH	HY	HAB	PERI	MB	HB	PAG	CB	CoW
STATISTICS	Mann-Whitney U-test p-value (GraphPad Prism 9.4.1)																					Mann-Whitney U p-value	LEGEND:
	0.484848	0.818182	0.24026	0.24026	0.588745	0.484848	0.699134	0.0930736	0.132035	0.588745	>0.9999	0.699134	0.818182	0.588745	0.588745	0.588745	0.699134	0.818182	0.818182	0.484848	0.588745		p<0.05
																						AQP4 (+/+)
	26.5624	32.2847	118.338	49.7989	31.0468	37.0134	110.803	37.6152	28.2754	94.5958	30.5362	107.542	33.7882	32.5393	55.6171	22.6921	33.794	39.6551	36.0042	33.0775	86.6514	MEAN
	11.8123	8.23438	16.829	6.14384	9.52832	16.0759	21.3409	4.73306	12.6281	18.7703	5.25413	11.9881	11.0229	12.2136	18.7241	2.61608	18.1288	11.732	7.23403	8.38142	13.7927	SD
																						AQP4 (-/-)
	23.9366	30.8466	124.141	58.0046	37.0353	46.3309	110.798	31.4654	38.2604	88.0397	30.4702	104.366	32.6518	37.1626	61.045	25.2321	39.5088	36.9384	36.3558	28.6445	91.6141	MEAN
	4.00825	7.74182	8.2256	12.3373	13.7078	12.939	11.7602	5.80154	14.8535	21.5225	5.07306	16.4663	8.88558	9.88233	21.6495	6.37295	7.08548	11.2647	10.9521	14.0797	18.8505	SD

## Sheet: X-direction MR DIFFUSION SCORES
	ADC values computed from 21 ROI																							ADC
	OLF	CP	LV	WM	HIP	CA/RSP	3V	VIS	SS	PCS	AUD	4V	TH	HY	HAB	PERI	MB	HB	PAG	CB	CoW	Animal code
AQP4(+/+)	0.4221	0.372	1.4381	0.3782	0.4223	0.4435	1.353	0.3834	0.4146	1.1524	0.4491	1.2049	0.4025	0.4505	0.5615	0.4264	0.4319	0.417	0.4412	0.4044	0.7758	1
	0.3774	0.3343	1.4099	0.311	0.4038	0.3771	1.3504	0.3492	0.3771	1.0045	0.4204	1.0474	0.3933	0.4021	0.5794	0.3907	0.3925	0.3926	0.4306	0.4018	0.6231	2
	0.3743	0.3501	1.3527	0.3316	0.4326	0.3835	1.2838	0.3433	0.3851	0.8935	0.4275	1.2517	0.3776	0.4263	0.4294	0.3854	0.4149	0.4022	0.4153	0.3789	0.376	3
	0.3938	0.3782	1.314	0.3596	0.4478	0.4163	1.4001	0.3695	0.4036	1.1525	0.4473	1.1986	0.4125	0.4615	0.4397	0.4078	0.4005	0.4108	0.4176	0.3918	0.5087	4
	0.4183	0.379	1.3441	0.3518	0.4305	0.3969	1.2758	0.3869	0.4005	1.1691	0.4431	1.3185	0.4113	0.4388	0.3682	0.394	0.4216	0.4225	0.4183	0.4172	0.6181	5
	0.372	0.3454	1.4364	0.3186	0.4096	0.3772	1.4056	0.3407	0.3786	1.1631	0.424	1.2405	0.3859	0.4308	0.3862	0.3805	0.3864	0.39	0.4121	0.4077	0.5712	6
AQP4(-/-)	0.3821	0.3903	1.4341	0.3861	0.4552	0.4246	1.3729	0.4046	0.423	1.053	0.4651	1.3763	0.447	0.4893	0.5598	0.4415	0.4481	0.5117	0.4458	0.4285	0.6586	7
	0.4016	0.3733	1.2323	0.3446	0.426	0.3917	1.2845	0.3552	0.4035	0.9484	0.4485	1.297	0.3957	0.4346	0.5075	0.4098	0.4194	0.4242	0.4191	0.3819	0.4821	8
	0.4218	0.3818	1.4238	0.3576	0.4751	0.4047	1.3498	0.4088	0.4152	0.8282	0.4523	1.1267	0.439	0.4517	0.5172	0.4363	0.451	0.4395	0.4452	0.3919	0.4522	9
	0.4061	0.3786	1.4361	0.3727	0.4517	0.4143	1.3898	0.3939	0.4199	1.172	0.4693	1.337	0.4359	0.4502	0.3867	0.4028	0.4188	0.4462	0.4562	0.4	0.6259	10
	0.4265	0.3845	1.3242	0.3459	0.4612	0.3881	1.2944	0.3918	0.4165	1.0033	0.4703	1.0753	0.4293	0.4615	0.3694	0.4346	0.4278	0.4622	0.4532	0.406	0.6077	11
	0.4023	0.3782	1.3335	0.332	0.4432	0.412	1.3887	0.3918	0.4225	0.9721	0.4577	1.3807	0.4413	0.4472	0.3652	0.4148	0.4417	0.4159	0.4461	0.3882	0.5447	12
	OLF	CP	LV	WM	HIP	CA/RSP	3V	VIS	SS	PCS	AUD	4V	TH	HY	HAB	PERI	MB	HB	PAG	CB	CoW
STATISTICS	Mann-Whitney U-test p-value (GraphPad Prism 9.4.1)																					Mann-Whitney U p-val	LEGEND:
	0.2403	0.0303	0.588745	0.3939	0.025974	0.4848	>0.9999	0.013	0.0087	0.3095	0.0043	0.3095	0.0152	0.1429	0.6991	0.026	0.0411	0.0087	0.0087	0.8182	0.9372		p<0.05
																						AQP4 (+/+)
	0.392983	0.359833	1.38253	0.3418	0.424433	0.399083	1.34478	0.362167	0.39325	1.08918	0.435233	1.21027	0.397183	0.435	0.460733	0.397467	0.407967	0.40585	0.422517	0.4003	0.578817	MEAN
	0.022457	0.0190144	0.0525398	0.0258175	0.0161234	0.0263781	0.0553811	0.0205001	0.0152143	0.114297	0.0126948	0.0905933	0.0140574	0.0206527	0.0891936	0.0169422	0.0177022	0.0131617	0.0111081	0.013339	0.132978	SD
																						AQP4 (-/-)
	0.406733	0.381117	1.364	0.356483	0.452067	0.4059	1.34668	0.391017	0.416767	0.996167	0.460533	1.2655	0.431367	0.45575	0.450967	0.4233	0.434467	0.44995	0.444267	0.399417	0.561867	MEAN
	0.0159432	0.00586836	0.0819117	0.0199701	0.0166252	0.0139813	0.0467371	0.0189374	0.00721212	0.114256	0.0090963	0.13198	0.0184297	0.0185811	0.0866797	0.0161411	0.0143418	0.0343769	0.0131313	0.0166052	0.0827557	SD
	D values computed from 21 ROI																							D-IVIM
	OLF	CP	LV	WM	HIP	CA/RSP	3V	VIS	SS	PCS	AUD	4V	TH	HY	HAB	PERI	MB	HB	PAG	CB	CoW	Animal code
AQP4(+/+)	0.3693	0.3144	0.8429	0.314	0.3454	0.3605	0.784	0.3215	0.34	0.6487	0.3792	0.5676	0.3408	0.378	0.396	0.3447	0.3605	0.3482	0.3659	0.3178	0.4842	1
	0.3444	0.299	0.7048	0.2704	0.3533	0.3372	0.7307	0.3144	0.335	0.5244	0.3703	0.4248	0.3483	0.3621	0.3753	0.347	0.3369	0.331	0.366	0.3589	0.411	2
	0.3202	0.2924	0.6234	0.2596	0.3492	0.2908	0.5926	0.2734	0.3134	0.4142	0.344	0.3373	0.3037	0.354	0.3312	0.3222	0.3247	0.3049	0.332	0.2879	0.232	3
	0.3477	0.3299	0.5873	0.2816	0.3831	0.3592	0.5814	0.2953	0.33	0.4829	0.37	0.4902	0.3425	0.3805	0.2964	0.3428	0.3315	0.3481	0.3463	0.3249	0.3166	4
	0.3634	0.3123	0.6422	0.2369	0.3503	0.3152	0.6217	0.3046	0.3122	0.4608	0.359	0.4017	0.3273	0.3404	0.296	0.315	0.3347	0.3591	0.3346	0.3301	0.3293	5
	0.3282	0.2957	0.7078	0.2657	0.3554	0.3183	0.696	0.2793	0.32	0.4505	0.365	0.3874	0.3131	0.341	0.3254	0.3372	0.3255	0.3246	0.3384	0.3674	0.3292	6
AQP4(-/-)	0.314	0.3056	0.6147	0.2754	0.3576	0.3209	0.6508	0.3133	0.3229	0.54	0.365	0.3691	0.3438	0.3748	0.3435	0.3443	0.3473	0.3962	0.3578	0.3454	0.3743	7
	0.334	0.3112	0.629	0.266	0.3421	0.2942	0.5962	0.2707	0.34	0.4536	0.37	0.3416	0.3256	0.3388	0.2986	0.3341	0.3297	0.3322	0.3287	0.3263	0.2983	8
	0.3761	0.3186	0.6051	0.2766	0.4084	0.3272	0.6731	0.3276	0.345	0.4437	0.382	0.441	0.3717	0.3656	0.3047	0.3664	0.3646	0.3562	0.3698	0.3425	0.2766	9
	0.3327	0.318	0.645	0.3104	0.3803	0.3301	0.6251	0.341	0.345	0.5046	0.386	0.4689	0.3365	0.3579	0.3083	0.3165	0.3368	0.3576	0.3717	0.3155	0.3506	10
	0.3529	0.306	0.6346	0.2535	0.3936	0.2995	0.5884	0.3057	0.33	0.4521	0.3893	0.386	0.3472	0.3819	0.2816	0.3584	0.335	0.3868	0.3604	0.343	0.364	11
	0.3463	0.3265	0.6064	0.2543	0.3752	0.3362	0.6431	0.3256	0.3456	0.4466	0.387	0.4027	0.3755	0.3725	0.3187	0.3592	0.3608	0.3297	0.3715	0.3214	0.329	12
	OLF	CP	LV	WM	HIP	CA/RSP	3V	VIS	SS	PCS	AUD	4V	TH	HY	HAB	PERI	MB	HB	PAG	CB	CoW
STATISTICS	Mann-Whitney U-test p-value (GraphPad Prism 9.4.1)																					Mann-Whitney U p-value	LEGEND:
	0.9372	0.3939	0.2403	>0.9999	0.1797	0.588745	0.6991	0.2403	0.0563	0.6991	0.0455	0.5887	0.1797	0.6991	0.3939	0.3095	0.1797	0.1797	0.2403	>0.9999	0.8182		p<0.05
																						AQP4 (+/+)
	0.345533	0.307283	0.684733	0.271367	0.356117	0.3302	0.667733	0.298083	0.3251	0.496917	0.364583	0.434833	0.329283	0.359333	0.336717	0.334817	0.335633	0.335983	0.3472	0.331167	0.350383	MEAN
	0.019143	0.0142241	0.090571	0.0256194	0.0136607	0.0273022	0.0818526	0.0191147	0.0116047	0.0828142	0.0120887	0.082041	0.0178286	0.0174766	0.0410974	0.0131712	0.0131159	0.0197536	0.0153048	0.0288897	0.086753	SD
																						AQP4 (-/-)
	0.342667	0.314317	0.622467	0.2727	0.3762	0.318017	0.62945	0.313983	0.338083	0.473433	0.379883	0.40155	0.35005	0.36525	0.309233	0.346483	0.3457	0.359783	0.359983	0.33235	0.332133	MEAN
	0.0211279	0.0081879	0.016234	0.0209565	0.0239423	0.0172011	0.0327324	0.0244654	0.00950503	0.039636	0.0100041	0.0468667	0.0197232	0.015328	0.0207938	0.0187484	0.0144047	0.0273479	0.0164309	0.0128622	0.0384005	SD
	D* values computed from 21 ROI																							D*-IVIM
	OLF	CP	LV	WM	HIP	CA/RSP	3V	VIS	SS	PCS	AUD	4V	TH	HY	HAB	PERI	MB	HB	PAG	CB	CoW	Animal code
AQP4(+/+)	3.3553	3.1041	5.0539	3.9213	3.9665	3.9118	5.0082	3.4021	3.7144	4.9517	3.5635	5.0165	4.0228	3.8958	3.9957	3.7448	3.6391	3.5464	3.7288	3.0141	4.1114	1
	3.2843	2.4318	4.8715	2.8384	3.4283	3.411	5.0131	2.8278	3.0697	4.3794	3.291	4.9381	3.3859	3.1731	3.5963	3.0217	3.1656	3.39	3.3436	3.2125	3.8276	2
	3.6207	3.3672	5.5254	3.5694	3.1433	3.5354	5.3992	3.2103	3.5575	4.7596	3.4074	5.4134	3.3549	3.543	3.5023	3.2593	3.7656	3.9081	3.7448	3.7886	3.6736	3
	2.8947	3.3978	5.0816	3.5526	3.8312	3.2838	5.0302	2.979	3.1926	4.9239	3.5091	5.1199	3.4901	3.1601	3.0935	3.5005	3.3467	3.7631	3.8305	3.5021	4.3659	4
	3.0585	3.2891	4.9184	3.2664	3.2418	3.0761	4.9494	3.3887	3.3943	5.0362	3.3084	4.9607	3.3683	3.5714	2.9049	3.5132	3.3334	3.3021	3.2573	3.6857	3.9862	5
	3.124	2.6985	5.3668	3.4266	3.6964	3.6198	5.2416	3.1142	3.3871	5.3467	3.5518	5.3638	3.6051	3.5206	2.7398	3.2794	3.0976	3.6164	3.2338	3.4299	4.2118	6
AQP4(-/-)	3.2994	3.5177	5.1162	3.4669	3.2049	3.536	5.1679	3.4428	3.4039	4.6968	3.4961	5.1357	3.5879	3.6399	4.098	3.5842	3.6905	3.8359	3.5106	3.4867	4.4416	7
	3.7835	3.1078	5.003	4.0013	3.5288	3.3649	5.1301	3.7193	3.4754	4.4696	3.7004	4.9255	3.7234	3.555	3.2754	3.4946	3.7459	3.6392	3.5531	3.2038	4.1439	8
	3.6589	3.517	5.149	3.6352	3.2921	3.5213	5.2165	3.6528	3.3653	4.4326	3.7321	5.0408	3.4079	3.9725	4.007	4.0577	3.7028	4.0605	3.8332	3.3307	4.3566	9
	3.5764	3.3868	5.4322	3.3772	3.5951	3.5823	5.3184	3.4508	3.4737	5.0128	3.563	5.4057	3.5015	3.5932	3.6796	3.5949	3.7918	4.049	3.5296	3.606	4.4253	10
	3.9798	3.4915	5.1423	3.3912	3.7109	3.3042	5.1232	3.3754	3.2697	4.8425	3.6608	4.8686	3.162	3.3877	3.297	3.7261	3.8773	3.7552	3.6238	3.6698	4.4897	11
	2.947	2.8811	4.8168	2.7652	2.9294	3.0166	4.9587	2.683	2.9717	4.4799	3.1039	4.8024	2.958	3.2952	3.4207	3.1233	3.2469	3.1394	3.2891	3.1195	3.6327	12
	OLF	CP	LV	WM	HIP	CA/RSP	3V	VIS	SS	PCS	AUD	4V	TH	HY	HAB	PERI	MB	HB	PAG	CB	CoW
STATISTICS	Mann-Whitney U-test p-value (GraphPad Prism 9.4.1)																					Mann-Whitney U p-value	LEGEND:
	0.132035	0.132035	0.937229	>0.9999	0.484848	0.699134	0.588745	0.132035	0.818182	0.24026	0.24026	0.393939	0.818182	0.393939	0.24026	0.309524	0.0930736	0.309524	0.818182	0.699134	0.179654		p<0.05
																						AQP4 (+/+)
	3.22292	3.04808	5.13627	3.42912	3.55125	3.47298	5.10695	3.15368	3.38593	4.89958	3.43853	5.1354	3.53785	3.47733	3.30542	3.38648	3.39133	3.58768	3.52313	3.43882	4.02942	MEAN
	0.254585	0.396832	0.257647	0.361276	0.331413	0.288153	0.174821	0.227342	0.234426	0.320022	0.12091	0.206531	0.255846	0.276891	0.474365	0.252253	0.262315	0.226541	0.272955	0.289478	0.253933	SD
																						AQP4 (-/-)
	3.54083	3.31698	5.10992	3.4395	3.37687	3.38755	5.15247	3.38735	3.32662	4.6557	3.54272	5.02978	3.39012	3.57392	3.62962	3.5968	3.67587	3.74653	3.55657	3.40275	4.2483	MEAN
	0.368161	0.264339	0.201906	0.403872	0.289576	0.211148	0.118974	0.369867	0.189971	0.236396	0.232301	0.219641	0.283436	0.235079	0.358901	0.304617	0.22085	0.340075	0.176316	0.221213	0.325134	SD
	check olf was rounded
	Fp values computed from 21 ROI																							Fp-IVIM
	OLF	CP	LV	WM	HIP	CA/RSP	3V	VIS	SS	PCS	AUD	4V	TH	HY	HAB	PERI	MB	HB	PAG	CB	CoW	Animal code
AQP4(+/+)	6.7077	9.8419	21.9353	10.3737	9.5248	11.4997	23.1652	9.4361	9.3912	25.5641	8.8979	23.3752	8.111	9.2804	7.4664	11.1297	10.3536	9.6387	10.0149	10.1624	18.5424	1
	6.238	7.0824	20.04	8.6124	7.4048	7.1173	19.5611	7.9607	7.9269	17.151	7.5338	16.7032	8.4299	6.6913	14.1262	7.0358	9.7639	10.2793	8.3666	5.9082	14.4643	2
	6.7677	8.0006	24.7821	9.7277	8.7273	11.9958	25.0641	9.4726	10.5298	22.9523	9.1577	24.6627	9.3551	9.1738	7.6817	7.0029	11.5393	12.0891	10.8871	11.0251	16.2166	3
	7.0779	7.5615	22.6237	13.0763	8.5578	7.1555	25.2572	11.214	9.6546	24.344	10.0557	23.4181	9.914	11.384	9.7055	8.2315	9.9956	9.4986	9.6546	8.8613	19.2175	4
	6.2145	9.3384	25.3626	17.3327	11.1349	10.3567	24.5736	13.1094	11.3364	23.4414	10.3634	24.1631	11.1777	11.2617	12.0087	10.4197	10.2882	9.4938	10.2573	9.5262	20.5296	5
	6.1684	7.0358	23.3874	9.5784	7.177	9.4872	22.7929	9.0961	8.0913	20.1185	8.0353	22.9686	8.3309	10.5619	8.0327	6.6289	7.5554	8.3534	8.8138	6.7064	18.7537	6
AQP4(-/-)	8.5657	10.7247	27.4902	13.7711	10.6349	11.1685	25.9772	10.7004	11.4797	24.6117	11.2802	24.7632	10.953	10.5858	13.4633	10.6423	12.0934	12.2462	9.707	9.4773	20.9701	7
	8.4625	7.7511	23.3595	12.8033	10.2023	12.0296	25.2913	11.4196	9.8311	23.3163	10.8039	26.194	10.2076	11.176	11.575	9.8551	10.8512	10.9807	10.6556	6.9421	18.427	8
	6.0988	9.3344	23.3845	12.2202	8.2493	9.6129	26.208	9.4051	8.916	22.4239	9.0336	20.9677	8.7953	10.5391	11.2791	9.2748	10.63	10.2098	9.2917	7.7119	18.619	9
	8.3743	8.1256	25.545	10.8075	8.6531	11.2065	25.8518	9.2312	9.7434	22.6929	9.3231	24.4712	11.5422	10.2391	8.9395	7.8275	10.2672	9.7123	10.3335	9.2911	17.678	10
	8.54	9.5781	26.2482	11.6473	10.0663	12.6094	28.8016	11.3759	11.8935	25.9389	9.9878	22.9718	10.7433	10.1565	11.5606	9.6988	10.7069	9.3957	11.7651	8.198	19.9122	11
	6.8541	6.5842	22.9102	12.1712	8.9195	9.6293	25.4321	9.4705	10.584	20.853	8.5319	22.4862	8.6066	9.8102	6.126	7.8096	10.2448	10.9981	9.1816	8.5063	16.9761	12
	OLF	CP	LV	WM	HIP	CA/RSP	3V	VIS	SS	PCS	AUD	4V	TH	HY	HAB	PERI	MB	HB	PAG	CB	CoW
STATISTICS	Mann-Whitney U-test p-value (GraphPad Prism 9.4.1)																					Mann-Whitney U p-value	LEGEND:
	0.0930736	0.588745	0.179654	0.309524	0.393939	0.24026	0.0021645	0.699134	0.179654	0.818182	0.309524	0.699134	0.179654	0.818182	0.818182	0.484848	0.179654	0.309524	0.484848	0.588745	0.818182		p<0.05
																						AQP4 (+/+)
	6.52903	8.14343	23.0219	11.4502	8.75443	9.60203	23.4023	10.0481	9.48837	22.2619	9.0073	22.5485	9.21977	9.72552	9.83687	8.40808	9.916	9.89215	9.66572	8.69827	17.954	MEAN
	0.375187	1.18528	1.94637	3.25363	1.45666	2.10111	2.13338	1.82758	1.33618	3.09267	1.10351	2.92781	1.18128	1.76176	2.70745	1.92396	1.30897	1.24274	0.935657	2.00109	2.20964	SD
																						AQP4 (-/-)
	7.8159	8.68302	24.8229	12.2368	9.45423	11.0427	26.2603	10.2671	10.4079	23.3061	9.82675	23.6424	10.1413	10.4178	10.4906	9.18468	10.7989	10.5905	10.1557	8.35445	18.7637	MEAN
	1.06676	1.48177	1.87277	1.00697	0.970342	1.22582	1.29096	1.01943	1.1302	1.77811	1.06327	1.86517	1.19626	0.466303	2.57818	1.14711	0.678998	1.03956	0.976563	0.958462	1.46259	SD
	Fp x D* values computed from 21 ROI																							Fp x D*-IVIM
	OLF	CP	LV	WM	HIP	CA/RSP	3V	VIS	SS	PCS	AUD	4V	TH	HY	HAB	PERI	MB	HB	PAG	CB	CoW	Animal code
AQP4(+/+)	23.6011	35.1723	110.736	45.2291	40.0702	48.7194	118.776	34.4696	36.7002	127.933	33.5703	118.875	32.964	39.0977	32.5807	44.5393	40.3509	37.3506	39.8062	31.0852	79.7949	1
	20.6922	17.8402	97.5768	27.3561	26.9508	24.6632	96.8076	26.3346	26.6687	74.7653	26.486	81.5887	30.4868	24.0512	58.9235	21.9677	33.4118	35.5148	28.7673	20.3423	59.3993	2
	27.5832	28.8427	136.861	35.0991	30.5334	44.3355	135.829	30.8511	41.2293	107.006	32.784	136.708	33.5355	33.0888	30.502	23.4981	46.9576	49.227	45.1824	46.2685	62.1783	3
	20.3915	28.6616	114.058	50.2505	34.9525	23.6821	127.095	35.6379	32.6586	115.789	38.3234	120.165	35.8572	39.2928	33.1747	30.3444	35.8489	37.9118	39.1593	33.3146	79.7242	4
	18.8753	30.9884	123.041	58.3799	39.0442	32.2481	120.482	46.1651	40.3838	114.021	36.2156	120.417	39.8308	42.5039	36.8315	37.945	35.5019	35.4974	35.5216	35.8634	82.0884	5
	19.1335	19.5103	124.842	37.1225	29.1897	37.1682	118.071	30.4922	29.3574	101.028	29.0548	121.885	33.4012	38.6541	24.6309	24.1398	23.5602	30.2236	30.7541	23.1514	80.333	6
AQP4(-/-)	30.2634	39.0448	141.813	50.2134	35.3639	40.923	132.904	37.7932	40.8421	115.168	40.482	131.67	41.6324	39.6423	59.8829	39.1208	45.668	48.2074	35.3124	34.5552	93.5396	7
	32.1309	25.9646	117.186	56.0772	37.3289	42.4024	130.547	44.3327	37.9997	104.564	41.4813	130.302	41.8695	41.9963	41.1151	35.9711	45.0914	41.2984	39.5958	24.8586	80.5838	8
	22.9644	34.7027	119.997	46.3791	30.0493	37.1932	135.775	36.9876	32.3774	99.0565	35.5184	108.86	31.4089	45.6932	47.7071	36.6338	43.1504	41.6891	39.3529	27.1996	82.9835	9
	29.4221	29.737	138.156	39.306	34.4065	41.8602	138.102	33.8904	36.7293	111.304	34.9517	132.184	42.5384	38.9126	36.5111	30.1851	43.3739	41.4401	37.6431	35.3877	80.1803	10
	36.2293	34.1421	135.483	41.5007	39.0751	44.0909	145.899	41.2343	40.89	125.17	37.9577	115.469	35.9665	37.5555	39.2942	38.5484	45.9833	39.4938	44.0381	32.4643	96.3868	11
	20.5797	20.6914	111.275	35.0068	25.0579	29.891	126.149	27.0773	33.3057	91.7644	28.0243	108.09	27.1859	35.0616	21.9797	25.2636	34.4486	35.2024	32.4514	27.9667	63.9405	12
	OLF	CP	LV	WM	HIP	CA/RSP	3V	VIS	SS	PCS	AUD	4V	TH	HY	HAB	PERI	MB	HB	PAG	CB	CoW
STATISTICS	Mann-Whitney U-test p-value (GraphPad Prism 9.4.1)																					Mann-Whitney U p-value	LEGEND:
	0.0411255	0.393939	0.309524	0.818182	>0.9999	0.588745	0.0411255	0.393939	0.484848	0.818182	0.24026	>0.9999	0.393939	0.484848	0.309524	0.393939	0.179654	0.24026	0.818182	0.937229	0.0930736		p<0.05
																						AQP4 (+/+)
	21.7128	26.8359	117.853	42.2395	33.4568	35.1361	119.51	33.9918	34.4997	106.757	32.739	116.606	34.3459	36.1148	36.1072	30.4057	35.9385	37.6209	36.5318	31.6709	73.9197	MEAN
	3.33223	6.76293	13.5148	11.2455	5.4088	10.2223	12.983	6.80986	5.93144	18.106	4.39633	18.3875	3.18495	6.6476	11.8766	9.10802	7.75493	6.30118	6.11798	9.32342	10.2447	SD
																						AQP4 (-/-)
	28.5983	30.7138	127.318	44.7472	33.5469	39.3934	134.896	36.8859	37.024	107.838	36.4026	121.096	36.7669	39.8102	41.0817	34.2871	42.9526	41.2219	38.0656	30.4054	82.9357	MEAN
	5.8344	6.64872	12.7111	7.69328	5.16142	5.19003	6.80464	6.00631	3.63261	11.936	4.85666	11.5761	6.39006	3.6839	12.5408	5.44272	4.32822	4.20213	3.97359	4.31913	11.5526	SD

## Sheet: Y-direction MR DIFFUSION SCORES
	ADC values computed from 21 ROI																							ADC
	OLF	CP	LV	WM	HIP	CA/RSP	3V	VIS	SS	PCS	AUD	4V	TH	HY	HAB	PERI	MB	HB	PAG	CB	CoW	Animal code
AQP4(+/+)	0.391	0.3863	1.3649	0.3655	0.3594	0.3534	1.3509	0.3648	0.374	1.0115	0.354	1.1751	0.3585	0.4055	0.6058	0.339	0.4005	0.4012	0.3754	0.3721	0.6424	1
	0.3753	0.3588	1.3553	0.3609	0.3477	0.3016	1.389	0.3294	0.3326	0.8454	0.3242	0.9567	0.3362	0.3506	0.5769	0.32	0.3576	0.345	0.3694	0.2828	0.4795	2
	0.3976	0.3718	1.2429	0.3753	0.369	0.3199	1.2263	0.3493	0.3474	0.6804	0.338	1.1008	0.3449	0.3209	0.4117	0.327	0.3684	0.3515	0.3493	0.3236	0.3146	3
	0.3917	0.386	1.1808	0.3504	0.361	0.3343	1.3864	0.3478	0.3543	0.9821	0.3346	1.0853	0.3388	0.3672	0.4753	0.333	0.3851	0.3894	0.3577	0.3218	0.4075	4
	0.3774	0.3845	1.2196	0.316	0.3637	0.3259	1.2426	0.3395	0.343	0.9822	0.3352	1.2045	0.3351	0.3276	0.3223	0.336	0.385	0.373	0.3519	0.3328	0.5189	5
	0.4022	0.3883	1.4067	0.3234	0.3576	0.3178	1.3808	0.3203	0.3312	1.041	0.3239	1.2358	0.3485	0.3536	0.392	0.347	0.3644	0.372	0.3556	0.3317	0.4811	6
AQP4(-/-)	0.4068	0.4098	1.2738	0.4974	0.373	0.3513	1.3443	0.375	0.3794	0.8407	0.3629	1.2725	0.3737	0.383	0.5472	0.351	0.4158	0.4439	0.371	0.373	0.5233	7
	0.3696	0.3785	1.1726	0.3682	0.3644	0.3214	1.2858	0.3474	0.352	0.8152	0.3366	1.2171	0.3432	0.3435	0.5134	0.334	0.4011	0.3971	0.3605	0.3175	0.3999	8
	0.3798	0.3816	1.3422	0.4004	0.3669	0.3445	1.3374	0.3748	0.3754	0.7151	0.3502	1.0841	0.3713	0.3567	0.5197	0.33	0.3852	0.4047	0.3793	0.3092	0.3727	9
	0.4091	0.4036	1.3502	0.3663	0.3755	0.3331	1.4068	0.3506	0.3496	0.9854	0.3595	1.2428	0.36	0.3612	0.4033	0.363	0.4028	0.3943	0.3851	0.3786	0.5016	10
	0.412	0.4095	1.2875	0.3719	0.3849	0.341	1.3554	0.3885	0.3885	0.8984	0.3583	1.0154	0.3665	0.3606	0.3809	0.355	0.4077	0.3902	0.3793	0.3446	0.4765	11
	0.3936	0.4023	1.2231	0.4367	0.3928	0.3524	1.4285	0.3896	0.3896	0.8622	0.3678	1.2862	0.3828	0.3643	0.3628	0.364	0.4212	0.4156	0.3957	0.352	0.4786	12
	OLF	CP	LV	WM	HIP	CA/RSP	3V	VIS	SS	PCS	AUD	4V	TH	HY	HAB	PERI	MB	HB	PAG	CB	CoW
STATISTICS	Mann-Whitney U-test p-value (GraphPad Prism 9.4.1)																					Mann-Whitney U p-val	LEGEND:
	0.3939	0.132035	0.588745	0.0152	0.0087	0.179654	0.699134	0.026	0.026	0.309524	0.0152	0.309524	0.0152	0.484848	0.818182	0.0931	0.0043	0.0152	0.013	0.393939	0.699134		p<0.05
																						AQP4 (+/+)
	0.3892	0.379283	1.29503	0.348583	0.359733	0.325483	1.32933	0.34185	0.347083	0.923767	0.334983	1.12637	0.343667	0.354233	0.464	0.333667	0.376833	0.372017	0.359883	0.327467	0.474	MEAN
	0.0107842	0.0116484	0.0921306	0.0238781	0.00710877	0.0174234	0.0749256	0.0157641	0.0158456	0.136841	0.0110458	0.10157	0.00891889	0.0304317	0.110435	0.0094163	0.0160672	0.0214739	0.0102975	0.0285681	0.109805	SD
																						AQP4 (-/-)
	0.39515	0.39755	1.2749	0.406817	0.37625	0.340617	1.3597	0.370983	0.372417	0.852833	0.355883	1.18635	0.36625	0.36155	0.45455	0.3495	0.405633	0.407633	0.378483	0.345817	0.458767	MEAN
	0.0173498	0.0139236	0.068568	0.0519453	0.0108415	0.0117812	0.0513147	0.0181976	0.0176014	0.0897462	0.0110843	0.110637	0.0136039	0.0127907	0.0809454	0.0144603	0.0126179	0.0198997	0.0120077	0.0282702	0.0592956	SD
	D values computed from 21 ROI																							D-IVIM
	OLF	CP	LV	WM	HIP	CA/RSP	3V	VIS	SS	PCS	AUD	4V	TH	HY	HAB	PERI	MB	HB	PAG	CB	CoW	Animal code
AQP4(+/+)	0.2895	0.2713	0.6709	0.2417	0.2475	0.243	0.5962	0.2513	0.2816	0.49	0.2462	0.4711	0.2565	0.2765	0.3236	0.2459	0.284	0.2945	0.2707	0.2626	0.3486	1
	0.2984	0.2672	0.5252	0.2247	0.2443	0.2143	0.5577	0.226	0.2554	0.3416	0.238	0.3992	0.233	0.2603	0.2597	0.238	0.2494	0.2383	0.2628	0.2099	0.2616	2
	0.3082	0.2709	0.4927	0.2543	0.2639	0.2137	0.48	0.2328	0.233	0.331	0.2366	0.3133	0.243	0.2224	0.2033	0.25	0.2471	0.2338	0.2518	0.2233	0.16	3
	0.3062	0.2756	0.4766	0.1936	0.2526	0.2397	0.5502	0.2413	0.2507	0.3672	0.2361	0.3402	0.2298	0.246	0.2622	0.2357	0.2721	0.2581	0.2532	0.2362	0.187	4
	0.3021	0.2748	0.4886	0.207	0.2599	0.2232	0.4879	0.2383	0.252	0.382	0.2458	0.3388	0.2362	0.2194	0.2323	0.2431	0.2783	0.2705	0.2486	0.2458	0.2325	5
	0.3084	0.2768	0.5302	0.1824	0.259	0.2007	0.491	0.216	0.2429	0.3692	0.2303	0.3932	0.247	0.2572	0.2635	0.262	0.2687	0.2603	0.2415	0.2544	0.2145	6
AQP4(-/-)	0.2991	0.2966	0.5264	0.3102	0.2847	0.247	0.5705	0.2736	0.2767	0.4191	0.2615	0.3077	0.2706	0.2602	0.2699	0.2617	0.2922	0.3238	0.2686	0.2812	0.2628	7
	0.2792	0.267	0.4943	0.2126	0.248	0.1858	0.4687	0.2062	0.231	0.3437	0.2312	0.3122	0.2179	0.2083	0.2444	0.2225	0.2623	0.2802	0.2455	0.2105	0.1832	8
	0.3156	0.2913	0.5332	0.2723	0.2732	0.2657	0.5566	0.2698	0.2998	0.3395	0.2636	0.3794	0.2807	0.2678	0.2707	0.256	0.2853	0.3163	0.2916	0.253	0.1905	9
	0.3065	0.257	0.49	0.2188	0.26	0.214	0.4637	0.2314	0.2549	0.3642	0.2578	0.2894	0.2418	0.2431	0.2489	0.253	0.2632	0.2666	0.2604	0.2962	0.2258	10
	0.3029	0.2814	0.4914	0.2164	0.2693	0.2068	0.4262	0.2498	0.2577	0.3693	0.2508	0.3163	0.2497	0.25	0.26	0.2558	0.2572	0.2737	0.2625	0.2551	0.2323	11
	0.3175	0.3121	0.501	0.2826	0.285	0.2455	0.5459	0.2728	0.2771	0.3294	0.2743	0.4219	0.2878	0.2796	0.2688	0.2836	0.3075	0.2949	0.3045	0.2464	0.2473	12
	OLF	CP	LV	WM	HIP	CA/RSP	3V	VIS	SS	PCS	AUD	4V	TH	HY	HAB	PERI	MB	HB	PAG	CB	CoW
STATISTICS	Mann-Whitney U-test p-value (GraphPad Prism 9.4.1)																					Mann-Whitney U p-value	LEGEND:
	0.6991	0.3939	0.9372	0.179654	0.0411	0.6991	0.3939	0.3095	0.3095	0.5887	0.0411	0.1797	0.2403	0.8182	0.5887	0.2403	0.3939	0.026	0.2403	0.2403	>0.9999		p<0.05
																						AQP4 (+/+)
	0.302133	0.272767	0.5307	0.217283	0.254533	0.222433	0.527167	0.234283	0.2526	0.380167	0.238833	0.375967	0.240917	0.246967	0.257433	0.245783	0.2666	0.25925	0.254767	0.2387	0.234033	MEAN
	0.00729593	0.00360703	0.0718746	0.027946	0.0076735	0.0163491	0.0475458	0.0123291	0.016316	0.0570261	0.00614448	0.0574018	0.00992661	0.0224459	0.040012	0.00948924	0.0151684	0.0221728	0.0104278	0.0197026	0.0662758	SD
																						AQP4 (-/-)
	0.303467	0.284233	0.50605	0.25215	0.270033	0.227467	0.505267	0.2506	0.2662	0.360867	0.256533	0.337817	0.258083	0.2515	0.26045	0.255433	0.27795	0.292583	0.272183	0.257067	0.22365	MEAN
	0.013868	0.02013	0.0189052	0.0416113	0.0143931	0.0300437	0.0597629	0.0273171	0.0236516	0.0322947	0.0146049	0.0513216	0.0264628	0.0247792	0.0114481	0.0196143	0.0201163	0.0233555	0.0218121	0.0297203	0.0313261	SD
	D* values computed from 21 ROI																							D*-IVIM
	OLF	CP	LV	WM	HIP	CA/RSP	3V	VIS	SS	PCS	AUD	4V	TH	HY	HAB	PERI	MB	HB	PAG	CB	CoW	Animal code
AQP4(+/+)	3.3887	3.6916	3.9023	3.9388	3.4504	3.8883	4.3724	3.6953	4.2437	4.2374	3.578	3.9307	3.9628	3.8625	3.9355	3.5069	3.8704	3.5938	3.4833	3.5342	4.1039	1
	3.3465	3.5305	4.0394	4.0155	3.4129	3.2792	4.2557	3.7313	3.3534	4.4777	3.5967	4.1337	3.4676	3.6284	3.8373	3.661	3.5634	3.4822	3.6168	3.4991	4.1008	2
	3.2895	3.4359	4.112	3.5604	3.2552	3.4472	4.0835	3.506	3.2907	4.0125	3.2454	3.9591	3.5728	3.5289	3.765	3.2146	3.6155	3.6375	3.332	3.2036	3.5366	3
	3.3386	3.7241	4.1727	4.0472	3.7428	3.5548	4.2219	3.5393	3.5693	4.3699	3.5796	4.0824	3.5499	3.861	3.598	3.1632	3.8607	4.0387	3.4423	3.1484	3.9564	4
	3.292	3.7308	4.1634	3.5317	3.5597	3.681	4.1118	3.9047	3.4043	4.3476	3.6123	4.0419	3.6645	3.2734	2.9953	3.1328	3.8532	4.015	3.7943	3.4135	4.139	5
	3.2943	3.9881	4.126	4.0499	3.536	3.8843	4.1463	4.1388	3.7712	4.8145	3.6586	4.21	3.8365	3.8606	3.2639	3.5488	3.9408	4.2256	3.8212	3.7141	4.3233	6
AQP4(-/-)	3.1408	3.2796	3.856	3.8985	3.1659	3.474	4.0466	3.4427	3.5157	3.9808	3.332	3.9448	3.3042	3.1944	3.5286	3.2588	3.4186	3.3914	3.4431	3.3226	3.938	7
	3.2564	3.8236	4.2201	4.5483	4.2375	4.0045	4.3744	3.5854	4.036	4.597	3.7898	4.2913	4.0293	4.243	4.7605	3.5067	4.2063	3.8958	3.6167	3.868	4.3782	8
	3.3215	3.4884	4.0284	3.9077	3.4608	3.5164	4.1654	3.4817	3.397	4.0958	3.668	3.9334	3.7561	3.4483	3.6963	3.4934	3.609	3.4618	3.5849	3.4479	4.0703	9
	3.2425	3.3526	4.2392	3.5448	3.2754	3.0513	4.2439	3.3749	3.2646	4.3083	3.2839	4.1601	3.463	3.3485	3.2472	3.0975	3.5168	3.3696	3.4127	3.1914	3.6814	10
	3.3773	3.9413	4.32	3.9225	3.8672	3.8295	4.4215	3.8397	3.8817	4.271	3.782	4.244	3.8577	3.7148	3.8142	3.7553	4.098	4.1238	4.0265	3.7973	4.4084	11
	3.181	3.263	4.1377	3.9286	3.6346	3.6436	4.0626	3.5869	3.5199	4.2681	3.5449	4.0132	3.4191	3.5138	3.7331	3.1644	3.4104	3.5957	3.5072	3.268	3.8832	12
	OLF	CP	LV	WM	HIP	CA/RSP	3V	VIS	SS	PCS	AUD	4V	TH	HY	HAB	PERI	MB	HB	PAG	CB	CoW
STATISTICS	Mann-Whitney U-test p-value (GraphPad Prism 9.4.1)																					Mann-Whitney U p-value	LEGEND:
	0.132035	0.309524	0.484848	0.699134	0.699134	0.937229	0.937229	0.132035	>0.9999	0.393939	0.699134	0.699134	0.699134	0.393939	0.937229	0.937229	0.484848	0.24026	>0.9999	0.818182	0.937229		p<0.05
																						AQP4 (+/+)
	3.32493	3.6835	4.08597	3.85725	3.49283	3.62247	4.1986	3.75257	3.60543	4.3766	3.5451	4.05963	3.67568	3.66913	3.56583	3.37122	3.784	3.83213	3.58165	3.41882	4.02667	MEAN
	0.0399915	0.190498	0.101687	0.244537	0.163387	0.24322	0.107263	0.237626	0.357547	0.266387	0.149769	0.105508	0.188748	0.24033	0.365437	0.227404	0.154777	0.299354	0.197614	0.212802	0.267273	SD
																						AQP4 (-/-)
	3.25325	3.52475	4.13357	3.9584	3.6069	3.58655	4.21907	3.55188	3.60248	4.2535	3.56677	4.0978	3.63823	3.57713	3.79665	3.37935	3.70985	3.63968	3.59852	3.48253	4.05992	MEAN
	0.0872204	0.290652	0.16824	0.324771	0.397969	0.328951	0.156736	0.163314	0.295513	0.210119	0.219966	0.155107	0.284709	0.369242	0.513258	0.249295	0.351869	0.305984	0.223923	0.284684	0.287131	SD
	Fp values computed from 21 ROI																							Fp-IVIM
	OLF	CP	LV	WM	HIP	CA/RSP	3V	VIS	SS	PCS	AUD	4V	TH	HY	HAB	PERI	MB	HB	PAG	CB	CoW	Animal code
AQP4(+/+)	12.8612	15.1234	30.02	15.8329	14.5202	14.4042	35.5893	14.7247	15.3203	32.1322	13.8992	29.394	13.7365	17.0314	18.247	12.1884	13.7121	12.3251	12.4576	12.4182	25.3668	1
	6.9007	10.5437	27.261	14.4384	10.2922	10.626	29.1795	12.4455	10.3354	23.9774	10.1499	20.5617	11.3319	10.9102	17.518	9.1353	10.9362	10.2736	10.0559	7.988	19.7755	2
	7.286	10.2878	28.8022	13.5586	9.6795	12.9796	28.4755	11.177	12.4106	21.0079	10.0698	24.7499	10.6764	10.3032	16.0713	7.7616	12.3703	12.8276	10.4113	9.3062	16.7513	3
	7.306	11.6955	28.2944	17.1484	10.9737	9.7717	29.3642	13.1564	12.7913	27.0039	10.7024	23.5682	12.808	13.3214	19.2256	9.6992	11.2469	14.5666	10.5766	7.7518	20.0855	4
	8.036	11.704	29.6135	14.0496	11.3469	11.9675	27.62	13.4344	12.7262	28.1618	10.664	26.6877	12.7296	11.2279	9.2994	8.4504	12.9821	12.229	11.7096	10.3926	21.4958	5
	10.0195	12.7354	32.754	17.8495	13.599	16.0379	33.3976	15.6538	13.2757	31.9096	12.5595	27.9827	13.3174	11.7868	17.3169	10.9314	10.9205	14.7099	13.5775	12.7434	24.9202	6
AQP4(-/-)	12.2351	12.9133	29.0018	16.6055	9.3652	12.3022	31.6342	12.54	13.5581	24.5352	11.5603	25.5666	10.4267	13.001	15.4418	8.4648	13.8218	11.2391	10.8952	8.4964	23.4979	7
	9.0544	12.877	30.8034	20.4996	13.8018	17.2964	32.0546	16.9325	15.7719	28.6569	12.2483	27.0588	15.9128	16.1624	20.0254	12.746	14.9485	13.8231	11.4255	12.4653	22.9685	8
	6.5158	10.4906	28.5659	15.2889	10.7995	9.6148	28.4558	11.5614	10.9776	21.3911	10.1581	21.8599	10.2094	9.9484	17.3712	8.1855	10.2243	10.0164	10.3862	7.979	19.897	9
	9.3316	11.989	29.3481	15.0982	11.9327	9.9143	29.4158	11.9785	12.4022	24.6997	9.8284	25.562	11.8687	10.7553	13.191	8.9182	13.6647	10.0956	11.2726	7.471	19.0077	10
	7.9032	12.0567	31.0636	16.8222	11.5275	14.584	33.0568	14.8574	13.36	27.4194	11.1195	27.5254	11.9355	11.6367	10.1922	9.8214	16.043	12.7723	13.2324	9.3994	20.8646	11
	5.9895	7.7661	27.0816	14.7284	11.3698	11.1346	29.8056	12.9811	12.5917	22.487	10.0087	25.8034	9.4339	9.132	8.3789	8.1616	11.1076	11.5874	9.0697	9.5857	18.9712	12
	OLF	CP	LV	WM	HIP	CA/RSP	3V	VIS	SS	PCS	AUD	4V	TH	HY	HAB	PERI	MB	HB	PAG	CB	CoW
STATISTICS	Mann-Whitney U-test p-value (GraphPad Prism 9.4.1)																					Mann-Whitney U p-value	LEGEND:
	0.818182	0.937229	>0.9999	0.484848	0.937229	0.937229	0.699134	0.937229	0.818182	0.484848	0.588745	>0.9999	0.24026	0.484848	0.393939	0.818182	0.309524	0.179654	0.699134	0.588745	0.699134		p<0.05
																						AQP4 (+/+)
	8.7349	12.015	29.4575	15.4796	11.7353	12.6311	30.6044	13.432	12.8099	27.3655	11.3408	25.4907	12.4333	12.4301	16.2797	9.69438	12.028	12.822	11.4648	10.1	21.3992	MEAN
	2.30956	1.76226	1.88756	1.75188	1.91148	2.34557	3.15146	1.59635	1.60056	4.38254	1.54466	3.20682	1.18389	2.47626	3.57563	1.63377	1.17408	1.65534	1.37061	2.14718	3.2898	SD
																						AQP4 (-/-)
	8.50493	11.3488	29.3107	16.5071	11.4661	12.4744	30.7371	13.4751	13.1103	24.8649	10.8205	25.5627	11.6312	11.7726	14.1001	9.38292	13.3017	11.589	11.0469	9.2328	20.8678	MEAN
	2.26034	1.96297	1.47792	2.12987	1.4522	2.97517	1.77423	2.04376	1.59159	2.78433	0.975436	1.99295	2.31437	2.53508	4.3918	1.75994	2.23219	1.49781	1.36671	1.77874	1.96621	SD
	Fp x D* values computed from 21 ROI																							Fp x D*-IVIM
	OLF	CP	LV	WM	HIP	CA/RSP	3V	VIS	SS	PCS	AUD	4V	TH	HY	HAB	PERI	MB	HB	PAG	CB	CoW	Animal code
AQP4(+/+)	46.1276	58.4991	117.524	65.2674	52.1927	57.9891	155.161	54.1582	66.1693	136.605	51.4792	115.68	55.8272	68.2712	75.3575	42.6166	56.0464	44.5872	44.9621	45.5324	107.374	1
	24.6018	39.3704	109.45	60.6502	37.4378	36.5471	122.98	48.7354	34.9118	104.277	38.1155	84.6637	40.2898	42.0397	69.3621	34.2008	40.0198	39.1653	38.1995	28.2463	83.126	2
	24.4257	36.2607	118.572	50.6581	33.9459	46.5033	115.536	42.2446	42.9266	87.94	33.4085	97.8454	38.8564	36.2881	63.8072	26.6878	46.2059	48.268	35.1846	30.5319	63.1037	3
	24.7984	44.4528	118.517	72.4932	42.41	36.0674	123.051	48.2872	47.5444	115.216	39.7772	94.6338	48.1984	53.029	73.2254	32.087	44.8853	60.4255	38.8427	25.9834	80.4928	4
	29.0993	44.4669	122.699	53.4002	43.5895	45.7114	112.465	54.0523	45.3104	119.002	39.5519	106.801	48.9852	37.2563	29.7235	27.7621	51.8243	50.9157	47.3098	38.6793	88.9668	5
	32.8107	52.831	134.395	75.6472	51.5465	66.5473	136.783	65.5385	51.8716	142.725	48.1705	116.687	54.4247	48.7343	60.5274	41.6588	45.8236	62.6342	55.4268	49.8259	110.825	6
AQP4(-/-)	38.4537	42.3249	111.864	66.7016	30.9159	43.475	127.382	43.8093	49.2381	98.1171	39.8631	100.569	35.8358	44.1858	57.2354	29.591	47.9899	39.1138	38.0939	30.002	94.468	7
	29.9636	51.2745	129.909	95.5411	60.9095	71.9559	137.363	61.7456	64.8526	132.893	48.357	115.45	65.3769	74.1786	98.4655	46.53	65.4199	57.5579	43.8134	51.4114	104.795	8
	22.4325	38.5148	114.829	63.6378	38.8471	35.825	116.476	40.8134	39.6444	89.5762	38.3348	85.0844	40.4596	34.6207	70.535	28.8699	38.4365	36.5106	40.8252	27.6975	83.2483	9
	31.9163	41.4217	123.324	52.1416	40.0133	31.3511	122.834	43.4049	42.224	102.662	33.5153	104.198	42.9146	37.222	44.8932	29.7533	51.3782	35.9991	39.9088	25.7875	71.7056	10
	27.0526	49.8956	133.303	69.5353	46.7552	59.186	144.44	59.8522	55.2406	116.622	44.0305	116.391	46.5123	44.9045	40.4874	38.551	67.6501	54.8537	54.9338	36.9554	93.8094	11
	20.4061	26.472	112.309	60.8912	43.8365	42.5839	120.038	47.5857	46.0169	94.6405	36.5458	104.326	33.5671	34.1013	33.0804	27.0278	39.0557	43.2791	34.051	31.7208	76.3085	12
	OLF	CP	LV	WM	HIP	CA/RSP	3V	VIS	SS	PCS	AUD	4V	TH	HY	HAB	PERI	MB	HB	PAG	CB	CoW
STATISTICS	Mann-Whitney U-test p-value (GraphPad Prism 9.4.1)																					Mann-Whitney U p-value	LEGEND:
	0.818182	0.484848	>0.9999	0.699134	>0.9999	0.699134	0.818182	0.484848	0.937229	0.309524	0.937229	0.937229	0.393939	0.484848	0.588745	0.937229	0.818182	0.179654	0.699134	0.699134	0.937229		p<0.05
																						AQP4 (+/+)
	30.3106	45.9802	120.193	63.0194	43.5204	48.2276	127.663	52.1694	48.1224	117.627	41.7505	102.718	47.7636	47.6031	62.0005	34.1688	47.4675	50.9993	43.3209	36.4665	88.9813	MEAN
	8.43211	8.32391	8.19699	10.052	7.34212	12.0375	15.8782	7.89429	10.4834	20.2845	6.7438	12.6084	7.01811	12.0327	16.7681	6.76478	5.63931	9.0868	7.45171	9.78005	17.8405	SD
																						AQP4 (-/-)
	28.3708	41.6506	120.923	68.0748	43.5463	47.3961	128.089	49.5352	49.5361	105.752	40.1078	104.336	44.1111	44.8688	57.4495	33.3872	51.655	44.5524	41.9377	33.9291	87.3891	MEAN
	6.59105	8.95913	9.30781	14.7212	10.0594	15.3105	10.7812	9.00856	9.28356	16.1723	5.34395	11.4339	11.423	15.0928	24.0533	7.58765	12.5881	9.42644	7.13787	9.38303	12.4916	SD
