# Supplementary material for: Loss of aquaporin-4 results in glymphatic system dysfunction via brain-wide interstitial fluid stagnation
Source: eLife. 2023 Feb 9;12:e82232. doi: 10.7554/eLife.82232 (PMC9995113; doi:10.7554/eLife.82232)
Supplement: Figure 2—source data 2. [file elife-82232-fig2-data2.xlsx]

## Sheet: DWI MICROBEADS PHANTOM
DWI and IVIM DWI scores
	FINE			MODERATE			COARSE			Plain water phantom
Measurement code	MEAN	SD	no. of scans	MEAN	SD	no. of scans	MEAN	SD	no. of scans	MEAN	SD	no. of scans
1	0.704	0.041	3	0.89	0.036	3	1.225	0.095	3	1.995	0.03	3	ADC
2	0.705	0.047	3	0.886	0.034	3	1.25	0.094	3	1.989	0.031	3
3	0.714	0.047	3	0.902	0.038	3	1.247	0.091	3	2.027	0.032	3
4	0.715	0.046	3	0.917	0.04	3	1.244	0.093	3	2.046	0.031	3				AVERAGE
5	0.721	0.078	3	0.919	0.043	3	1.261	0.093	3							FINE	MODERATE	COARSE	PLAIN
6	0.714	0.078	3	0.912	0.036	3	1.255	0.094	3							0.712167	0.904333	1.247	2.01425
1	0.654	0.051		0.838	0.045		1.03	0.076		1.562	0.048		D-IVIM
2	0.642	0.048		0.839	0.041		1.04	0.078		1.544	0.045
3	0.648	0.049		0.842	0.045		1.05	0.078		1.551	0.045
4	0.664	0.05		0.871	0.044		1.049	0.078		1.538	0.046					AVERAGE
5	0.644	0.069		0.863	0.05		1.047	0.075								FINE	MODERATE	COARSE	PLAIN
6	0.617	0.071		0.881	0.039		1.052	0.08								0.644833	0.855667	1.04467	1.54875
1	4.766	1.992		4.112	1.512		4.267	1.581		5.167	1.114		D* -IVIM
2	4.474	2.095		4.679	2.054		4.541	1.629		5.204	0.852
3	4.667	2.164		4.388	1.868		4.15	1.667		5.395	0.648
4	4.106	1.847		4.147	1.414		4.508	1.736		5.345	0.593					AVERAGE
5	5.712	8.113		4.372	1.509		4.352	1.556								FINE	MODERATE	COARSE	PLAIN
6	4.997	5.632		4.925	2.313		4.131	1.59								4.787	4.43717	4.32483	5.27775
1	6.538	4.114		4.7	3.035		8.67	4.758		14.688	3.385		Fp - IVIM
2	7.768	4.397		4.5	3.076		9.75	4.989		15.678	2.993
3	8.692	4.949		5.42	3.513		8.9	4.795		16.625	3.013
4	7	4.247		4.34	2.77		8.99	4.695		17.68	3.203					AVERAGE
5	9.89	5.92		5.33	3.669		9.45	4.834								FINE	MODERATE	COARSE	PLAIN
6	11	6.382		3.75	2.545		9.2	4.833								8.48133	4.67333	9.16	16.1677
1	33.065	25.829		20.215	14.984		41.191	27.146		79.2	24.269		Fp x D* - IVIM
2	34.915	26.586		21.524	18.826		49.094	28.717		83.382	20.44
3	42.844	33.128		25.765	20.639		41.6	27.908		91.528	18.635
4	29.696	22.714		18.97	14.379		43.36	27.378		96.248	18.961					AVERAGE
5	60.752	95.853		24.556	18.539		45.43	27.541								FINE	MODERATE	COARSE	PLAIN
6	60.682	82.57		18.365	16.982		42.379	27.59								43.659	21.5658	43.8423	87.5895

## Sheet: uCT and T1 CORRELATION PHANTOM
Microbeads phantom - separate measurements for DWI and T1 relaxation
	µCT	MRI	ADC [um2/s]			D [um2/s]			D* [um2/s]
Microbeads + 1μM/ml Gadavis	free fluid volume rate [%]	mean T1 time [ms]	mean	SD	no. of meas.	mean	SD	no. of meas.	mean	SD	no. of meas.
Fine	19.07	124.161	0.5602	0.02732	4	0.5117	0.03061	4	4.508	0.5258	4
Moderate	22.9	180.673	0.892	0.01707	5	0.8508	0.007402	5	3.378	0.3913	5
Coarse	24.96	201.371	1.073	0.01553	8	0.9257	0.00757	8	3.858	0.2087	8
H20 + 1μM/ml Gadavist (plain)		256.301	2.038	0.03492	7	1.546	0.01081	7	5.33	0.1047	7
Pearson r (DWI vs T1)
r			0.9547			0.9771			0.4204
95% confidence interval			-0.07798 to 0.9991			0.2631 to 0.9995			-0.9072 to 0.9839
R squared			0.9114			0.9547			0.1768
P value
P (two-tailed)			0.0453			0.0229			0.5796
P value summary			*			*			ns
Significant? (alpha = 0.05)			Yes			Yes			No
Comparisons			4			4			4
Pearson r (ADC and D vs. µCT)
r	0.9698
95% confidence interval	0.7433 to 0.9968
R squared	0.9406
P value
P (two-tailed)	0.0014
P value summary	**
Significant? (alpha = 0.05)	Yes
Comparisons	6
