# Supplementary material for: Loss of aquaporin-4 results in glymphatic system dysfunction via brain-wide interstitial fluid stagnation
Source: eLife. 2023 Feb 9;12:e82232. doi: 10.7554/eLife.82232 (PMC9995113; doi:10.7554/eLife.82232)
Supplement: Figure 2—source data 3. [file elife-82232-fig2-data3.xlsx]

## Sheet: VASCULAR DENSITY
	VASCULAR DENSITY [% ROI]
	AQP4 (+/+)	AQP4 (-/-)	AQP4 (+/+)	AQP4 (-/-)	AQP4 (+/+)	AQP4 (-/-)	AQP4 (+/+)	AQP4 (-/-)	AQP4 (+/+)	AQP4 (-/-)	AQP4 (+/+)	AQP4 (-/-)	AQP4 (+/+)	AQP4 (-/-)	AQP4 (+/+)	AQP4 (-/-)	AQP4 (+/+)	AQP4 (-/-)	AQP4 (+/+)	AQP4 (-/-)	AQP4 (+/+)	AQP4 (-/-)	AQP4 (+/+)	AQP4 (-/-)	AQP4 (+/+)	AQP4 (-/-)	AQP4 (+/+)	AQP4 (-/-)	AQP4 (+/+)	AQP4 (-/-)	AQP4 (+/+)	AQP4 (-/-)	AQP4 (+/+)	AQP4 (-/-)
	OLF	OLF	CA	CA	RSP	RSP	V1	V1	S1	S1	M1	M1	AUD	AUD	HIP	HIP	PERI	PERI	INS	INS	TH	TH	HAB	HAB	HY	HY	CP	CP	WM	WM	PCS	PCS	EPD	EPD
			26	21	32	32	34	33	31	25	30	31	32	28	30	30	44	27	26	29	28	32	30	45	26	32	27	30		16	30	21	27	23
			20	28	31	35	30	40	26	29	30	31	32	28	30	28	26	28	25	27	29	25	40	30	30	25	25	29	10	21	25	20	26	25
			33	24	36	38	38	39	29	28	28	27	26	35	31	29	25	26	26	26	24	29	28	36	26	22	31	24	23	26	26	16	26	26
	30	34	24	33	34	34	33	28	25	26	36	33	32	28	31	30	38	29	30	43	32	34	35	32		26	35	36	18	18	46	38	25	39
	28	33	32	30	38	42	39	32	25	35	32	43	30	35	29	32	28	37	31	50	28	30	32	43	27	33	30	42	22	13	36	41	30	31
	28	32	36	34	34	36	35	42	29	33	33	37	29	21	31	29	23	29	28	43	25	35	34	45	29	16	33	30	16	13	23	29	33	44
MEAN	28.6667	33	28.5	28.3333	34.1667	36.1667	34.8333	35.6667	27.5	29.3333	31.5	33.6667	30.1667	29.1667	30.3333	29.6667	30.6667	29.3333	27.6667	36.3333	27.6667	30.8333	33.1667	38.5	27.6	25.6667	30.1667	31.8333	17.8	17.8333	31	27.5	27.8333	31.3333
SD	1.1547	1	6.12372	5.08593	2.56255	3.48807	3.3116	5.46504	2.50998	3.93277	2.81069	5.60952	2.40139	5.26941	0.816497	1.36626	8.38252	3.93277	2.42212	10.2307	2.87518	3.65605	4.21505	6.71565	1.81659	6.3456	3.71035	6.27429	5.21536	5.03653	8.67179	10.2518	3.0605	8.4538
