# Supplementary material for: Loss of aquaporin-4 results in glymphatic system dysfunction via brain-wide interstitial fluid stagnation
Source: eLife. 2023 Feb 9;12:e82232. doi: 10.7554/eLife.82232 (PMC9995113; doi:10.7554/eLife.82232)
Supplement: Figure 2—source data 4. [file elife-82232-fig2-data4.xlsx]

## Sheet: AQP4 EXPRESSION
AQP4 CHANNEL EXPRESSION [% ROI] (only WT)
RSP	VIS	SS	AUD	HIP	PERI	TH	HAB	HY	WM	PCS	Animal code no.
24.8	12.3	27	42.7	82.8	26.7	94	99.5	83.2	26.2	47.2	1
25.6	24.7	31.8	50.2	93.5	54.8	94.9	99.8	36.5	26.6	76.6	2
18.5	12.5	33.2	30.8	92.3	42.6	95.7	99.8	39.4	33	70	3
37.2	41	49.6	34.1	87	32.1	96.8	99.9	69.5	32.4	99	4
26.525	22.625	35.4	39.45	88.9	39.05	95.35	99.75	57.15	29.55	73.2	MEAN
7.79289	13.5532	9.83192	8.74776	4.95109	12.4028	1.19024	0.173205	22.8955	3.6492	21.3185	SD
