# Supplementary material for: Loss of aquaporin-4 results in glymphatic system dysfunction via brain-wide interstitial fluid stagnation
Source: eLife journal article supplement (doi:10.7554/elife.82232), 2023-02-09
Supplement: supp [file elife_poa_e82232_Source_data_1.xls]

## Sheet: 3D-CISS MR Volumetry
							CSF space volumetry
								* CSF / brain volume ratio = CSF vol./ (Brain vol. - CSF-vol.)
	Animal code no.	Body weight [g]	Respiration rate [bpm]	Age [weeks]	3D-CISS SNR	Brain volume (round) [mm3]	Whole CSF (round) [mm3]	Whole CSF (round to 4 digits after '.')	Control sum of compartments *	Lateral ventricles	3rd ventricle	4th ventricle	Basilar artery	CoW	Parietal	Remaining perivascular CSF	Whole ventricular	Whole perivascular
Aqp4 (+/+)	1	28	202	15	3.33	487.8	15.68	0.0332	0.03322	0.0109	0.0049	0.00284	0.00045	0.00183	0.0034	0.0089	0.01864	0.0112
	2	28	219	15	3.28	444.5	15.22	0.0355	0.03553	0.0181	0.0061	0.00258	0.00035	0.0013	0.002	0.0051	0.02678	0.0067
	3	27.5	132	15	3.05	459.7	16.71	0.0377	0.0378	0.0107	0.0052	0.00234	0.00067	0.00239	0.0043	0.0122	0.01818	0.0153
	4	28	133	15	3.49	466.1	17.48	0.039	0.03906	0.0123	0.0058	0.00277	0.00086	0.00293	0.0039	0.0105	0.0208	0.0143
	5	24	184	13	4.07	509.6	20.27	0.0414	0.04148	0.014	0.006	0.00271	0.00059	0.00478	0.0069	0.0065	0.0227	0.0119
	6	30	184	12	3.58	494	21.01	0.0445	0.04451	0.0161	0.0056	0.00282	0.00047	0.00462	0.0072	0.0077	0.02447	0.0128
									0
Aqp4 (-/-)	7	29	164	15	3.75	536.3	14.65	0.0281	0.02812	0.0071	0.00436	0.0031	0.00034	0.00231	0.0049	0.00601	0.01455	0.0087
	8	30	138	15	3.5	519.3	17.06	0.034	0.03397	0.0111	0.00508	0.00278	0.00072	0.00272	0.0047	0.00687	0.01897	0.0103
	9	27	206	15	3.58	525.4	15.35	0.0301	0.03012	0.00843	0.00411	0.00207	0.00051	0.00282	0.0052	0.00698	0.01462	0.0103
	10	24	200	12	3.77	522.1	12.03	0.0236	0.02356	0.0067	0.00421	0.00266	0.00017	0.00232	0.0036	0.0039	0.01357	0.0064
	11	25	178	10	3.97	500.7	16.23	0.0337	0.03371	0.0068	0.00373	0.00229	0.00046	0.00436	0.0072	0.00887	0.01284	0.0137
	Mann Whitney test (p-value)	0.7662	>0.9999 (exact)	0.697	0.1385	0.0087	0.1255	0.0173		0.0173	0.0087	0.6623	0.4286	0.9307	0.4589	0.2468	0.0173	0.1623
Aqp4 (+/+)			>0.9271 (approximate)
	MEAN	27.5833	175.667	14.1667	3.46667	476.95	17.7283	0.03855	0.0386	0.0136833	0.0056	0.00267667	0.000565	0.002975	0.00461667	0.00848333	0.0219283	0.0120333
	SD	1.96002	35.8813	1.32916	0.347716	24.26	2.40065	0.00405894	0.00406063	0.00296676	0.000469042	0.000189596	0.000182839	0.00144395	0.002041	0.00260953	0.0033684	0.00301839
Aqp4 (-/-)
	MEAN	27	177.2	13.4	3.714	520.76	15.064	0.0299	0.029896	0.008026	0.004298	0.00258	0.00044	0.002906	0.00512	0.006526	0.01491	0.00988
	SD	2.54951	27.6622	2.30217	0.182839	12.9359	1.92366	0.00430755	0.00431548	0.0018528	0.000495247	0.00040651	0.000204083	0.000844796	0.00131034	0.00180145	0.0023863	0.00266683
Overall	MEAN	27.3182	176.364	13.8182			*Note: Values used for statistical analysis were rounded from double to single precision, so a discrepancy at the 4th digit after '.' between the CSF volume and whole segmented CSF space ratio are possible due to quantization error.
	SD	2.14794	30.8294	1.77866

## Sheet: AVERAGE MR DIFFUSION SCORES
	ADC values computed from 21 ROI																							AVERAGE ADC				Animal code no.	Body weight [g]	Respiration rate [bpm]	Age [weeks]
	OLF	CP	LV	WM	HIP	CA/RSP	3V	VIS	SS	PCS	AUD	4V	TH	HY	HAB	PERI	MB	HB	PAG	CB	CoW	Animal code					Aqp4 (+/+)	1	21	180.08	10
AQP4(+/+)	0.5232	0.5327	1.9358	0.54	0.5454	0.5725	1.9289	0.5101	0.5451	1.4068	0.53	1.2828	0.536	0.6257	0.7195	0.55	0.5432	0.5424	0.5687	0.5068	1.02	1						2	19	170	10
	0.4876	0.4906	1.947	0.503	0.5146	0.4778	1.9533	0.468	0.4787	0.836	0.4932	0.9405	0.5045	0.5385	0.6502	0.5044	0.489	0.4978	0.5541	0.4322	0.6961	2						3	20	184.38	11
	0.4963	0.4987	1.8125	0.472	0.5439	0.4909	1.8008	0.46	0.4991	0.7151	0.499	0.7043	0.4927	0.518	0.5234	0.4972	0.4821	0.4848	0.5277	0.4465	0.5016	3						4	25	175	10
	0.5063	0.5132	1.7507	0.505	0.544	0.512	1.9625	0.4781	0.5022	0.8	0.5116	0.8037	0.5132	0.5892	0.5372	0.5237	0.5084	0.5184	0.5399	0.4527	0.6205	4						5	23	180.59	10
	0.5008	0.5259	1.7885	0.49	0.5481	0.507	1.7863	0.487	0.509	0.8833	0.5129	0.7251	0.5142	0.5536	0.5301	0.5335	0.5051	0.5162	0.5404	0.4907	0.7013	5						6	26	170	12
	0.5143	0.5204	1.9848	0.483	0.5285	0.5069	1.9798	0.45	0.4938	1.0163	0.5063	0.8197	0.5125	0.575	0.5839	0.5372	0.5013	0.5098	0.5422	0.4733	0.6854	6					Aqp4 (-/-)		19	160	11
AQP4(-/-)	0.5256	0.5336	1.8266	0.565	0.5457	0.527	1.8596	0.495	0.521	1.0005	0.5237	0.6788	0.5354	0.599	0.7293	0.5233	0.5255	0.61	0.5488	0.4966	0.7712	7						7	19	160	10
	0.5026	0.5264	1.7069	0.503	0.5513	0.4983	1.8435	0.485	0.5131	0.9148	0.5161	0.7174	0.5223	0.5669	0.584	0.5213	0.5216	0.5344	0.5489	0.4471	0.6013	8						8	20	190	11
	0.5294	0.531	1.9596	0.53	0.5638	0.5108	1.8962	0.5	0.522	0.802	0.5277	0.9018	0.5488	0.5715	0.5777	0.5273	0.5285	0.5379	0.5543	0.4264	0.5799	9						9	26	175	10
	0.5389	0.5436	1.957	0.525	0.5734	0.5303	2.0124	0.49	0.5351	0.8485	0.5447	0.933	0.5527	0.5753	0.5727	0.5534	0.5316	0.5701	0.5922	0.5033	0.6357	10						10	26	190	10
	0.5528	0.5646	1.8614	0.51	0.5823	0.5302	1.9707	0.502	0.5465	0.9592	0.5505	0.7956	0.5539	0.574	0.5616	0.5605	0.5552	0.5559	0.5876	0.465	0.7343	11						11	25	160	10
	0.52	0.5412	1.7763	0.5504	0.5773	0.5361	1.9795	0.532	0.5474	0.7702	0.5427	0.7935	0.5558	0.5693	0.5256	0.5469	0.5485	0.5537	0.5786	0.4654	0.6788	12
																												Mann Whitney test (p-value)	0.935	0.632	>0.9999
	OLF	CP	LV	WM	HIP	CA/RSP	3V	VIS	SS	PCS	AUD	4V	TH	HY	HAB	PERI	MB	HB	PAG	CB	CoW						Aqp4 (+/+)
STATISTICS	Mann-Whitney U-test p-value (GraphPad Prism 9.4.1)																					Mann-Whitney U p-val	LEGEND:					MEAN	22.3333	176.675	10.5
	0.026	0.0087	0.9372	0.046	0.0043	0.2403	0.5887	0.0649	0.026	>0.9999	0.0152	0.4848	0.0087	0.6991	0.8182	0.3939	0.026	0.0087	0.0411	>0.9999	0.8182		p<0.05					SD	2.80476	5.97001	0.83666
																						AQP4 (+/+)
	0.50475	0.513583	1.86988	0.498833	0.537417	0.511183	1.90193	0.475533	0.50465	0.942917	0.508833	0.87935	0.512183	0.566667	0.590717	0.524333	0.50485	0.511567	0.5455	0.467033	0.70415	MEAN					Aqp4 (-/-)
	0.0127682	0.0162081	0.0975895	0.0236594	0.0131404	0.0326255	0.0856695	0.0213678	0.0222848	0.248147	0.0128042	0.214582	0.0142202	0.0384569	0.0790441	0.0202105	0.0212827	0.0196365	0.014123	0.0283591	0.172168	SD						MEAN	22.5	172.5	10.3333
																						AQP4 (-/-)						SD	3.50714	14.7479	0.516398
	0.528217	0.540067	1.84797	0.530567	0.565633	0.522117	1.92698	0.500667	0.53085	0.882533	0.534233	0.80335	0.544817	0.576	0.591817	0.538783	0.53515	0.560333	0.5684	0.4673	0.666867	MEAN
	0.017032	0.0136122	0.100023	0.0236357	0.0146993	0.0144706	0.0698896	0.0165851	0.0143338	0.0906617	0.0136257	0.0995577	0.0132426	0.0116742	0.070463	0.0169021	0.0135187	0.0275739	0.0200117	0.029135	0.0753773	SD					Overall	MEAN	22.4167	174.588	10.4167
																												SD	3.0289	10.9461	0.668558
	D values computed from 21 ROI																							AVERAGE D-IVIM
	OLF	CP	LV	WM	HIP	CA/RSP	3V	VIS	SS	PCS	AUD	4V	TH	HY	HAB	PERI	MB	HB	PAG	CB	CoW	Animal code
AQP4(+/+)	0.4873	0.5041	0.9503	0.512	0.5245	0.5252	0.9265	0.4977	0.5217	0.8965	0.5197	0.8448	0.5072	0.5912	0.6087	0.5189	0.5182	0.5149	0.5422	0.4802	0.7147	1
	0.4798	0.4842	0.9978	0.4824	0.5065	0.4756	0.9753	0.465	0.4745	0.7074	0.4873	0.7293	0.5013	0.5336	0.5824	0.5005	0.4861	0.4824	0.5256	0.4256	0.6145	2
	0.4888	0.4883	0.8763	0.4607	0.5354	0.4848	0.7735	0.4567	0.4964	0.641	0.4927	0.5926	0.4886	0.5096	0.5162	0.4908	0.4709	0.4739	0.5125	0.436	0.462	3
	0.4996	0.5029	0.8967	0.468	0.5353	0.5016	0.7629	0.4695	0.4942	0.7006	0.5037	0.7129	0.5024	0.5735	0.5092	0.5092	0.5009	0.5011	0.5304	0.4449	0.5143	4
	0.4992	0.5237	0.919	0.4767	0.55	0.5016	0.7623	0.4862	0.5074	0.7478	0.5128	0.6281	0.5143	0.546	0.5256	0.5297	0.5042	0.5185	0.5352	0.4873	0.5828	5
	0.511	0.5196	0.9648	0.4625	0.5245	0.5103	0.8592	0.4494	0.4911	0.7533	0.5044	0.621	0.5064	0.5666	0.5452	0.5366	0.5005	0.5072	0.536	0.4743	0.5567	6
AQP4(-/-)	0.492	0.5116	0.8276	0.5114	0.5277	0.513	0.7767	0.4813	0.5032	0.7333	0.511	0.5873	0.5172	0.5758	0.6037	0.5078	0.5038	0.5811	0.5294	0.4897	0.5774	7
	0.4899	0.522	0.8943	0.4909	0.5435	0.4957	0.5927	0.4837	0.5097	0.7159	0.513	0.6063	0.5159	0.549	0.5566	0.5135	0.5135	0.5226	0.535	0.4456	0.5174	8
	0.5143	0.5269	0.8662	0.5103	0.5582	0.5037	0.8187	0.4913	0.5178	0.6739	0.5235	0.6515	0.542	0.5659	0.5548	0.5229	0.5159	0.5286	0.5367	0.4287	0.5027	9
	0.5206	0.5328	0.9282	0.5124	0.5657	0.5246	0.7954	0.4824	0.5299	0.6861	0.5359	0.6979	0.5376	0.5589	0.5359	0.5458	0.526	0.5552	0.5682	0.4973	0.5616	10
	0.5215	0.5369	0.9192	0.4832	0.5739	0.5165	0.7646	0.4951	0.5396	0.6935	0.5366	0.6407	0.5388	0.5528	0.5152	0.5497	0.538	0.535	0.5613	0.4594	0.5791	11
	0.5066	0.53	0.8868	0.5025	0.5659	0.5256	0.8106	0.5251	0.5427	0.6757	0.5342	0.654	0.5442	0.5553	0.5152	0.5375	0.5338	0.5392	0.5581	0.46	0.5728	12
	OLF	CP	LV	WM	HIP	CA/RSP	3V	VIS	SS	PCS	AUD	4V	TH	HY	HAB	PERI	MB	HB	PAG	CB	CoW
STATISTICS	Mann-Whitney U-test p-value (GraphPad Prism 9.4.1)																					Mann-Whitney U p-value	LEGEND:
	0.0931	0.0152	0.132	0.0411	0.0238	0.1667	0.5887	0.132	0.026	0.2403	0.0152	0.4848	0.0022	0.8182	>0.9999	0.1797	0.026	0.0022	0.132	0.5887	0.6991		p<0.05
																						AQP4 (+/+)
	0.494283	0.5038	0.93415	0.47705	0.529367	0.49985	0.843283	0.47075	0.49755	0.7411	0.503433	0.688117	0.503367	0.553417	0.547883	0.514283	0.4968	0.499667	0.530317	0.45805	0.574167	MEAN
	0.0111399	0.0159434	0.0452332	0.0190325	0.0146123	0.0177342	0.0921914	0.0181816	0.0159103	0.0861845	0.0120734	0.0939042	0.0085638	0.0295714	0.0397342	0.0174603	0.0163004	0.0179311	0.0103639	0.0257774	0.0870878	SD
																						AQP4 (-/-)
	0.507483	0.5267	0.88705	0.501783	0.555817	0.513183	0.759783	0.49315	0.523817	0.6964	0.5257	0.639617	0.532617	0.559617	0.5469	0.529533	0.521833	0.543617	0.548117	0.46345	0.551833	MEAN
	0.0138901	0.00896973	0.0367385	0.0121822	0.0171714	0.0117571	0.0843188	0.016573	0.0161445	0.0236267	0.0116389	0.0389699	0.0126681	0.00979498	0.033207	0.0173676	0.013052	0.0214482	0.0163065	0.026036	0.0332622	SD
	D* values computed from 21 ROI																							AVERAGE D*-IVIM
	OLF	CP	LV	WM	HIP	CA/RSP	3V	VIS	SS	PCS	AUD	4V	TH	HY	HAB	PERI	MB	HB	PAG	CB	CoW	Animal code
AQP4(+/+)	4.8838	4.8217	5.4829	6.2231	7.0533	6.4769	5.7675	5.0852	5.5847	5.4162	6.8588	5.5381	7.0002	6.5216	7.3101	5.3833	6.1146	5.2614	5.9564	5.5066	5.3137	1
	4.5594	4.3033	5.3246	4.6346	4.5884	4.0155	5.4486	4.0413	3.2764	5.2801	4.3329	5.2051	3.6364	3.9107	4.7442	4.1424	4.7109	4.2719	5.0951	3.584	5.1729	2
	4.8307	5.4861	5.5841	5.5522	4.9664	5.7935	5.5295	6.6419	6.4845	5.1893	5.3478	5.6785	5.3109	5.1503	4.9459	5.5619	6.7442	6.0271	5.5353	5.8393	6.8296	3
	3.5733	4.8033	5.4009	5.2626	5.5971	5.2832	5.3838	3.7752	4.5934	5.2361	4.0259	5.4652	4.3642	5.0908	3.6674	4.8923	5.5907	5.4303	5.6533	4.2817	5.5359	4
	5.0056	4.566	5.3211	4.8402	5.0174	3.7051	5.3578	5.485	3.6438	5.5815	5.88	5.3943	5.1232	5.9908	2.4112	5.8204	4.1462	6.6729	5.0577	6.8897	6.0677	5
	4.4779	5.0626	5.5145	6.0791	6.5087	4.7406	5.5077	6.0374	6.7931	6.2535	6.371	5.6418	6.2518	5.5175	6.0064	6.9906	2.9043	7.5552	5.5086	5.1928	6.1181	6
AQP4(-/-)	4.2484	5.0922	5.2283	4.7517	4.0895	4.5291	5.2164	4.7887	4.3736	4.9356	4.7737	5.2408	4.9373	4.5283	4.7233	4.7134	5.1563	4.2366	4.6463	3.6896	5.0848	7
	5.2559	4.1943	5.4223	5.3649	7.4383	4.0364	5.4707	5.5076	6.3373	5.2116	5.8745	5.5833	5.2109	6.3011	6.6364	4.8682	5.0532	4.5628	5.7254	4.7089	5.5831	8
	4.9586	5.3567	5.5621	5.42	4.8321	5.6037	5.5222	4.5736	4.9147	5.3585	5.7486	5.5443	5.1758	5.1825	4.8413	6.3405	6.0817	5.372	5.5059	6.2894	5.8461	9
	5.2078	6.1575	5.6806	5.6075	4.5547	5.0057	5.7362	5.4006	5.2702	5.5839	5.3457	5.65	6.2345	5.8408	5.1152	3.9546	5.5735	5.9536	5.0328	4.8609	6.0146	10
	5.0088	6.1509	5.5653	6.6815	5.9663	6.2383	5.6352	5.2536	6.3496	5.4455	5.8669	5.6796	5.1522	6.2739	5.4079	6.3055	7.4895	5.9697	6.6147	5.3168	5.8387	11
	4.9895	3.7626	5.4359	5.2621	5.685	5.25	5.4481	5.8783	3.7692	5.3681	4.9659	5.3163	3.9795	5.0747	6.2547	4.233	3.9888	5.5648	4.9126	5.8517	5.4929	12
	OLF	CP	LV	WM	HIP	CA/RSP	3V	VIS	SS	PCS	AUD	4V	TH	HY	HAB	PERI	MB	HB	PAG	CB	CoW
STATISTICS	Mann-Whitney U-test p-value (GraphPad Prism 9.4.1)																					Mann-Whitney U p-value	LEGEND:
	0.0931	0.5887	0.5887	0.9372	0.6991	0.9372	0.9372	>0.9999	>0.9999	0.8182	0.6991	0.6991	0.8182	0.9372	0.4848	0.4848	0.8182	0.3939	0.4848	>0.9999	0.5887		p<0.05
																						AQP4 (+/+)
	4.55512	4.8405	5.43802	5.43197	5.62188	5.00247	5.49915	5.17767	5.06265	5.49278	5.4694	5.48717	5.28112	5.36362	4.84753	5.46515	5.03515	5.8698	5.46773	5.21568	5.83965	MEAN
	0.520934	0.407872	0.106878	0.644018	0.969449	1.05871	0.147544	1.11753	1.46374	0.398911	1.12268	0.174231	1.22222	0.893181	1.71791	0.953634	1.40218	1.15125	0.342476	1.16714	0.620159	SD
																						AQP4 (-/-)
	4.94483	5.11903	5.48242	5.51462	5.42765	5.11053	5.5048	5.23373	5.1691	5.3172	5.42922	5.50238	5.11503	5.53355	5.49647	5.0692	5.55717	5.27658	5.40628	5.11955	5.64337	MEAN
	0.362549	0.989486	0.156747	0.639909	1.20884	0.779402	0.177992	0.480112	1.04171	0.223005	0.478161	0.181413	0.719513	0.717769	0.781614	1.02501	1.17335	0.724153	0.711733	0.919107	0.333268	SD
	Fp values computed from 21 ROI																							AVERAGE Fp-IVIM
	OLF	CP	LV	WM	HIP	CA/RSP	3V	VIS	SS	PCS	AUD	4V	TH	HY	HAB	PERI	MB	HB	PAG	CB	CoW	Animal code
AQP4(+/+)	6.6393	7.5478	25.7979	8.6576	6.2909	8.9357	29.0735	6.4163	6.5567	28.3214	5.9172	24.6612	6.0896	6.9575	9.8281	6.4125	7.2716	5.6	6.0058	5.6254	22.0882	1
	3.0016	3.5733	21.6318	6.1747	3.9852	4.009	19.1798	3.1281	4.0503	13.1118	3.289	14.6879	3.3309	2.3589	11.2564	2.2563	4.0288	4.4211	5.2835	3.3853	12.4414	2
	2.3708	3.6729	21.1966	4.8167	3.1812	5.57	19.9175	3.5665	3.1511	13.9076	3.0686	17.2724	3.5025	3.4626	7.8713	2.9978	5.0005	5.2701	5.3591	3.0675	9.9117	3
	2.0945	3.97	20.432	8.4508	3.7122	3.7668	20.7443	3.9208	3.6559	17.8402	3.6117	18.2689	4.5118	4.8962	6.9066	4.0603	3.4065	5.5791	4.1951	2.7096	10.8021	4
	2.0551	4.5243	22.3654	9.3142	3.3184	5.4675	19.6936	5.5323	4.1619	17.5778	3.6029	15.8427	4.7827	4.294	4.8294	3.7857	3.5759	3.6667	3.7857	4.2625	11.543	5
	2.502	2.6506	23.4734	6.7399	3.4811	3.7336	21.8598	4.8923	3.2312	19.342	3.5572	21.3321	4.051	4.4468	7.4594	3.0548	3.4711	3.4409	3.3373	2.726	13.5032	6
AQP4(-/-)	4.3381	4.3004	25.4258	7.2552	4.2127	3.4946	24.6841	3.7399	3.8878	18.8447	3.3896	18.5779	3.1819	3.7656	11.1791	2.731	4.5733	3.8565	3.9638	1.9326	14.7326	7
	2.8157	3.5019	22.8336	6.5123	3.8171	4.6348	20.1295	4.5689	3.991	17.2527	2.8752	20.2729	4.0545	5.1985	11.7838	3.673	3.9418	4.047	3.974	2.5942	11.9058	8
	2.1304	2.7431	20.9901	6.6633	2.798	4.2276	21.0367	3.9358	3.2762	11.9586	3.0299	16.5256	3.6732	3.3711	13.685	2.8046	3.9278	3.81	4.6659	2.266	11.1999	9
	3.3602	3.8925	24.075	5.9924	3.6607	4.6972	20.2208	4.359	4.0852	15.0332	3.785	19.65	4.19	4.7572	6.0967	2.873	4.0691	3.3916	5.5325	2.3828	13.1685	10
	3.0876	5.102	23.9824	6.7406	3.7957	5.2153	23.6942	3.6184	4.5028	22.1044	4.1598	18.4288	4.6173	5.5469	6.9391	4.148	5.3862	5.1953	5.2477	3.6332	14.8271	11
	3.1207	3.0084	22.4969	8.5761	3.8958	5.0746	22.617	3.9793	3.6905	13.0274	3.5475	12.6231	4.034	3.8384	4.438	3.1532	5.0906	4.3196	4.4556	2.9338	12.6196	12
	OLF	CP	LV	WM	HIP	CA/RSP	3V	VIS	SS	PCS	AUD	4V	TH	HY	HAB	PERI	MB	HB	PAG	CB	CoW
STATISTICS	Mann-Whitney U-test p-value (GraphPad Prism 9.4.1)																					Mann-Whitney U p-value	LEGEND:
	0.2403	0.6991	0.3939	0.6991	0.8182	0.6991	0.3095	0.8182	0.8182	0.4848	0.5887	>0.9999	0.5887	0.9372	0.8182	0.5887	0.3939	0.3095	>0.9999	0.0649	0.4848		p<0.05
																						AQP4 (+/+)
	3.11055	4.32315	22.4828	7.35898	3.99483	5.2471	21.7447	4.57605	4.13452	18.3501	3.8411	18.6775	4.37808	4.40267	8.0252	3.76123	4.45907	4.66298	4.66108	3.62938	13.3816	MEAN
	1.76226	1.69388	1.92714	1.72918	1.16064	1.98864	3.71079	1.26064	1.25594	5.44872	1.0394	3.71338	1.00808	1.53917	2.25829	1.44679	1.50017	0.962334	1.04103	1.13334	4.44473	SD
																						AQP4 (-/-)
	3.14212	3.75805	23.3006	6.95665	3.69667	4.55735	22.0637	4.03355	3.90558	16.3702	3.4645	17.6797	3.95848	4.41295	9.02028	3.23047	4.49813	4.10333	4.63992	2.62377	13.0756	MEAN
	0.722701	0.869038	1.53515	0.891258	0.477316	0.626765	1.89859	0.364306	0.409616	3.80019	0.476406	2.7884	0.487243	0.878187	3.686	0.566089	0.626767	0.615771	0.64828	0.596611	1.47761	SD
	Fp x D* values computed from 21 ROI																							AVERAGE Fp x D*-IVIM
	OLF	CP	LV	WM	HIP	CA/RSP	3V	VIS	SS	PCS	AUD	4V	TH	HY	HAB	PERI	MB	HB	PAG	CB	CoW	Animal code
AQP4(+/+)	35.383	43.7377	141.335	58.6888	48.1035	59.2809	168.582	35.9242	36.1294	154.089	42.0356	135.956	43.0469	49.6636	67.507	33.6112	44.3779	30.489	36.349	31.0558	120.25	1
	12.3597	16.0395	111.951	33.5459	19.2911	15.4523	100.116	15.9348	14.4785	69.13	16.8065	75.2853	13.7909	11.1824	63.6713	8.5931	18.1159	20.1955	28.2527	13.639	64.2504	2
	14.5408	22.1488	117.747	30.5851	19.7492	37.6598	109.318	20.5154	23.0779	69.8468	17.3695	94.6371	22.1095	18.9584	40.7038	16.0317	35.4277	32.5283	33.2901	21.4502	72.8348	3
	9.3883	23.2526	107.563	44.7607	21.1139	21.2671	109.401	17.678	17.3701	89.5764	16.6992	96.7266	23.1236	28.1126	30.7912	23.0382	22.8528	34.377	25.6597	12.2239	55.1511	4
	9.9657	22.3848	117.569	49.2667	18.3223	19.2728	100.31	29.4686	18.0381	91.8739	22.9216	80.7004	29.7119	26.2802	16.8178	24.1928	16.3112	25.5677	24.8151	27.108	69.4107	5
	11.0447	11.0453	127.803	45.9318	26.8694	22.1366	118.012	34.8628	20.9781	100.808	26.6385	116.947	29.3019	28.1168	51.4493	24.3917	10.9283	30.267	19.43	22.0868	87.8431	6
AQP4(-/-)	19.6419	22.1984	131.403	35.8923	18.7088	18.1519	125.849	19.9385	18.4179	92.7349	16.6517	95.0715	19.4678	16.8575	56.9744	12.3571	24.1837	17.9861	19.2847	7.6263	74.5665	7
	18.1298	15.4638	118.889	37.857	32.2627	18.5097	107.635	26.8097	24.1361	89.7122	16.9282	112.544	19.4712	36.8322	65.1775	21.1015	17.8852	21.2094	25.729	14.1264	68.1314	8
	10.9028	13.8761	118.279	39.7241	16.8024	25.3978	115.91	19.2916	17.7299	63.7814	17.531	86.729	23.5755	19.7755	72.0983	20.0208	25.5289	23.3706	27.7402	19.62	66.0163	9
	17.9053	25.564	133.636	42.5151	18.5837	23.529	107.723	27.4415	22.4156	82.7863	22.2064	104.856	27.4498	32.2117	31.7279	11.1245	23.8118	21.3786	28.3251	12.7707	75.4308	10
	16.5256	32.8193	132.049	49.2387	27.2006	33.8175	123.358	20.7628	34.2488	117.95	28.7898	103.078	26.7248	37.9645	39.8544	27.9715	45.4364	33.3366	35.7613	22.3936	86.4383	11
	14.9364	11.6859	121.631	44.1191	25.2449	29.6283	122.522	23.4695	13.34	67.0148	19.4028	55.7373	16.4504	25.9806	30.5104	14.0441	20.8423	25.8566	24.1213	19.2084	71.9333	12
	OLF	CP	LV	WM	HIP	CA/RSP	3V	VIS	SS	PCS	AUD	4V	TH	HY	HAB	PERI	MB	HB	PAG	CB	CoW
STATISTICS	Mann-Whitney U-test p-value (GraphPad Prism 9.4.1)																					Mann-Whitney U p-value	LEGEND:
	0.1797	0.8182	0.1797	0.5887	0.8182	>0.9999	0.4848	0.8182	0.9372	0.5887	0.8182	0.9372	0.3939	0.8182	0.8182	0.3939	0.4848	0.2403	0.8182	0.3095	0.9372		p<0.05
																						AQP4 (+/+)
	15.447	23.1014	120.661	43.7965	25.5749	29.1783	117.623	25.7306	21.6787	95.8873	23.7451	100.042	26.8474	27.0523	45.1567	21.6431	24.669	28.9041	27.9661	21.2606	78.29	MEAN
	9.93911	11.1581	12.1976	10.3616	11.4467	16.594	25.8449	8.8236	7.68026	31.1822	9.81865	22.8157	9.83301	12.8957	19.551	8.49739	12.7208	5.18514	6.1125	7.35673	23.2078	SD
																						AQP4 (-/-)
	16.3403	20.2679	125.981	41.5577	23.1338	24.839	117.166	22.9523	21.7147	85.6632	20.2517	93.0027	22.1899	28.2703	49.3905	17.7699	26.2814	23.8563	26.8269	15.9576	73.7528	MEAN
	3.10238	8.08577	7.11821	4.80893	6.07788	6.1702	8.05003	3.53773	7.21583	19.7163	4.6658	20.2792	4.42481	8.83713	17.7862	6.44329	9.77813	5.32386	5.44633	5.44652	7.1995	SD

## Sheet: Average ADC to D correlation
							PARENCHYMAL ROI
region	ADC	D		PEARSON's correlation				AQP4 (+/+)				AQP4 (-/-)
OLF	0.5048	0.4943		r=				region	ADC	D		region	ADC	D
CP	0.5136	0.5038		0.940001				OLF	0.5048	0.4943		OLF	0.5282	0.5075
LV	1.8699	0.9342						CP	0.5136	0.5038		CP	0.5401	0.5267			regions of main differences in both average ADC and D
WM	0.4988	0.4771						WM	0.4988	0.4771		WM	0.5306	0.5018
HIP	0.5374	0.5294						HIP	0.5374	0.5294		HIP	0.5656	0.5558
CA/RSP	0.5112	0.4999						CA/RSP	0.5112	0.4999		CA/RSP	0.5221	0.5132
3V	1.9019	0.8433						VIS	0.4755	0.4708		VIS	0.5007	0.4932
VIS	0.4755	0.4708						SS	0.5047	0.4976		SS	0.5309	0.5238
SS	0.5047	0.4976						AUD	0.5088	0.5034		AUD	0.5342	0.5257
PCS	0.9429	0.7411						TH	0.5122	0.5034		TH	0.5448	0.5326
AUD	0.5088	0.5034						HY	0.5667	0.5534		HY	0.576	0.5596
4V	0.8794	0.6881						HAB	0.5907	0.5479		HAB	0.5918	0.5469
TH	0.5122	0.5034						PERI	0.5243	0.5143		PERI	0.5388	0.5295
HY	0.5667	0.5534						MB	0.5049	0.4968		MB	0.5352	0.5218
HAB	0.5907	0.5479						HB	0.5116	0.4997		HB	0.5603	0.5436
PERI	0.5243	0.5143						PAG	0.5455	0.5303		PAG	0.5684	0.5481
MB	0.5049	0.4968						CB	0.467	0.4581		CB	0.4673	0.4635
HB	0.5116	0.4997
PAG	0.5455	0.5303						MEAN	0.517356	0.505012			0.539687	0.524581
CB	0.467	0.4581						SD	0.0309258	0.0257549			0.0298814	0.0249966
CoW	0.7042	0.5742
OLF	0.5282	0.5075						MEAN	0.5115	0.5014			0.542712	0.528975
CP	0.5401	0.5267						SD	0.0115517	0.0142766			0.0134137	0.015943
LV	1.848	0.8871
WM	0.5306	0.5018						Range of parenchymal ADC and D difference between the genotypes from ~5.5 to ~6.1 % (~1.5% SD), (8 or 10 most significant regions included). Mean value of ~5.7 % and ~1.5% SD reported.
HIP	0.5656	0.5558
CA/RSP	0.5221	0.5132
3V	1.927	0.7598
VIS	0.5007	0.4932
SS	0.5309	0.5238
PCS	0.8825	0.6964
AUD	0.5342	0.5257
4V	0.8034	0.6396
TH	0.5448	0.5326
HY	0.576	0.5596
HAB	0.5918	0.5469
PERI	0.5388	0.5295
MB	0.5352	0.5218
HB	0.5603	0.5436
PAG	0.5684	0.5481
CB	0.4673	0.4635
CoW	0.6669	0.5518

## Sheet: Z-direction MR DIFFUSION SCORES
	ADC values computed from 21 ROI																							ADC
	OLF	CP	LV	WM	HIP	CA/RSP	3V	VIS	SS	PCS	AUD	4V	TH	HY	HAB	PERI	MB	HB	PAG	CB	CoW	Animal code
AQP4(+/+)	0.4728	0.5033	1.7503	0.5538	0.4944	0.5397	1.7354	0.4554	0.4553	1.2266	0.458	1.6175	0.4981	0.5704	0.779	0.5428	0.4221	0.4525	0.5196	0.4202	1.04	1
	0.4683	0.4995	1.7554	0.555	0.4664	0.4477	1.727	0.4182	0.4158	1.0806	0.434	1.2795	0.4658	0.526	0.7647	0.5128	0.4031	0.4411	0.52	0.3872	0.7719	2
	0.473	0.4989	1.6159	0.4558	0.5052	0.4691	1.5979	0.382	0.4295	0.852	0.44	1.5391	0.4647	0.5095	0.6162	0.5246	0.3708	0.4147	0.522	0.3887	0.483	3
	0.4735	0.4759	1.5242	0.5044	0.4983	0.4849	1.7296	0.4201	0.4165	1.2208	0.443	1.5095	0.4725	0.554	0.6639	0.532	0.4191	0.4281	0.515	0.3927	0.6532	4
	0.4436	0.4948	1.5307	0.5124	0.5009	0.4764	1.5802	0.4342	0.4266	1.2584	0.446	1.6136	0.4784	0.5422	0.5876	0.5704	0.3901	0.4334	0.517	0.4302	0.8085	5
	0.4864	0.4827	1.709	0.4883	0.4766	0.4597	1.7002	0.4041	0.4083	1.2095	0.4385	1.5299	0.4629	0.5302	0.57	0.5558	0.4064	0.4197	0.5	0.4064	0.7003	6
AQP4(-/-)	0.553	0.5109	1.5954	0.498	0.5069	0.4978	1.5882	0.4286	0.4253	1.0392	0.45	1.6096	0.4827	0.5714	0.7852	0.5091	0.4089	0.5081	0.53	0.4106	0.8134	7
	0.4798	0.5053	1.4675	0.4739	0.4951	0.4385	1.6173	0.3953	0.4216	0.9686	0.443	1.5327	0.4901	0.5276	0.6832	0.5055	0.3901	0.4342	0.52	0.3735	0.6235	8
	0.5347	0.5118	1.7419	0.5051	0.5211	0.4869	1.6277	0.4464	0.4483	0.9042	0.47	1.4236	0.507	0.5503	0.696	0.5326	0.4215	0.4453	0.519	0.363	0.6139	9
	0.5158	0.5131	1.6663	0.5231	0.5251	0.497	1.7765	0.4234	0.448	1.2754	0.475	1.6005	0.5053	0.5475	0.6158	0.5806	0.4208	0.5043	0.56	0.4262	0.8243	10
	0.54	0.5536	1.5628	0.4785	0.5111	0.4801	1.6808	0.368	0.4354	1.0627	0.4682	1.4194	0.4994	0.5289	0.551	0.5453	0.445	0.4575	0.55	0.3922	0.7211	11
	0.4985	0.5439	1.5625	0.5822	0.5487	0.4993	1.7698	0.4733	0.4653	1.1472	0.483	1.68	0.5117	0.5727	0.5667	0.5807	0.4368	0.4832	0.56	0.3936	0.8349	12
	OLF	CP	LV	WM	HIP	CA/RSP	3V	VIS	SS	PCS	AUD	4V	TH	HY	HAB	PERI	MB	HB	PAG	CB	CoW
STATISTICS	Mann-Whitney U-test p-value (GraphPad Prism 9.4.1)																					Mann-Whitney U p-val	LEGEND:
	0.004329	0.002165	0.4848	0.9372	0.0152	0.3939	0.9372	0.8182	0.1797	0.3939	0.0173	0.9372	0.008658	0.3939	0.8182	0.9372	0.1429	0.0152	0.0303	0.58875	0.8182		p<0.05
																						AQP4 (+/+)
	0.4696	0.492517	1.64758	0.511617	0.4903	0.479583	1.67838	0.419	0.425333	1.14132	0.44325	1.51485	0.473733	0.538717	0.663567	0.539733	0.401933	0.431583	0.5156	0.404233	0.742817	MEAN
	0.0141205	0.0108027	0.105675	0.0384016	0.0153237	0.032169	0.0704715	0.0250953	0.0165892	0.154492	0.00829307	0.12371	0.0132585	0.0216213	0.0898022	0.0210818	0.0191416	0.0139267	0.00802496	0.0178792	0.184836	SD
																						AQP4 (-/-)
	0.5203	0.5231	1.5994	0.510133	0.518	0.483267	1.67672	0.4225	0.44065	1.06622	0.464867	1.5443	0.499367	0.549733	0.64965	0.5423	0.420517	0.4721	0.539833	0.393183	0.738517	MEAN
	0.0275698	0.0202793	0.0947593	0.0396177	0.0184268	0.0231697	0.080506	0.0371482	0.0164089	0.131785	0.0152849	0.105962	0.0110384	0.0196272	0.0887762	0.0331693	0.0196252	0.0310608	0.0191877	0.023208	0.101309	SD
	D values computed from 21 ROI																							D-IVIM
	OLF	CP	LV	WM	HIP	CA/RSP	3V	VIS	SS	PCS	AUD	4V	TH	HY	HAB	PERI	MB	HB	PAG	CB	CoW	Animal code
AQP4(+/+)	0.4429	0.4786	0.8643	0.4962	0.4808	0.4937	0.807	0.4469	0.437	0.7359	0.4456	0.8189	0.4698	0.5341	0.5829	0.5144	0.401	0.434	0.4941	0.4073	0.6273	1
	0.4529	0.4957	0.7831	0.5027	0.4545	0.4455	0.7226	0.4086	0.415	0.583	0.426	0.7386	0.4627	0.5103	0.5166	0.4951	0.399	0.4306	0.4869	0.3841	0.5072	2
	0.4526	0.4788	0.6743	0.4133	0.4971	0.4547	0.6303	0.3766	0.42	0.5407	0.4334	0.6939	0.4538	0.5023	0.5224	0.5063	0.364	0.4103	0.4917	0.3767	0.4005	3
	0.4653	0.4623	0.7082	0.4472	0.4892	0.4718	0.7251	0.4194	0.412	0.5822	0.4367	0.6735	0.4666	0.5261	0.5205	0.507	0.407	0.4147	0.4949	0.3906	0.4414	4
	0.4409	0.4869	0.7391	0.4798	0.5022	0.4742	0.7278	0.4322	0.43	0.612	0.4464	0.7113	0.4763	0.5327	0.5775	0.5645	0.393	0.4363	0.5141	0.4342	0.5007	5
	0.4835	0.4801	0.7558	0.4459	0.4715	0.4624	0.6838	0.4039	0.4076	0.5937	0.4363	0.7003	0.4616	0.5229	0.5322	0.5458	0.409	0.4155	0.4951	0.4072	0.4554	6
AQP4(-/-)	0.5314	0.4946	0.7645	0.4642	0.4998	0.4926	0.6642	0.428	0.426	0.6478	0.4422	0.713	0.4792	0.5637	0.5982	0.502	0.41	0.4966	0.5217	0.4099	0.5358	7
	0.4599	0.4981	0.6997	0.4488	0.4883	0.4311	0.6691	0.3969	0.42	0.591	0.4396	0.6957	0.4843	0.5118	0.5317	0.4894	0.39	0.4283	0.4957	0.3697	0.4534	8
	0.493	0.5057	0.7043	0.4767	0.5167	0.4812	0.7254	0.429	0.444	0.5664	0.4615	0.7084	0.5011	0.5399	0.5569	0.5209	0.418	0.4437	0.4998	0.362	0.469	9
	0.5012	0.501	0.7296	0.4697	0.5172	0.4952	0.6913	0.4215	0.45	0.5933	0.4688	0.6853	0.4936	0.526	0.5445	0.565	0.414	0.4958	0.5265	0.4296	0.5169	10
	0.4897	0.535	0.7224	0.4568	0.509	0.4728	0.7051	0.367	0.436	0.5799	0.4681	0.6698	0.496	0.5162	0.5142	0.5412	0.445	0.4596	0.5337	0.3943	0.5132	11
	0.4733	0.5189	0.7168	0.4897	0.5255	0.485	0.7419	0.4647	0.4594	0.5857	0.4704	0.6868	0.4895	0.5546	0.5519	0.5596	0.425	0.4694	0.5341	0.3864	0.5263	12
	OLF	CP	LV	WM	HIP	CA/RSP	3V	VIS	SS	PCS	AUD	4V	TH	HY	HAB	PERI	MB	HB	PAG	CB	CoW
STATISTICS	Mann-Whitney U-test p-value (GraphPad Prism 9.4.1)																					Mann-Whitney U p-value	LEGEND:
	0.0152	0.0043	0.3939	0.937229	0.026	0.3095	0.6991	0.9372	0.0455	0.8182	0.026	0.3095	0.0022	0.3095	0.699134	0.8182	0.0411	0.0152	0.0087	0.699134	0.3095		p<0.05
																						AQP4 (+/+)
	0.45635	0.4804	0.754133	0.464183	0.48255	0.46705	0.7161	0.4146	0.420267	0.607917	0.4374	0.72275	0.465133	0.5214	0.542017	0.522183	0.3955	0.423567	0.496133	0.400017	0.48875	MEAN
	0.0158921	0.0110439	0.0658601	0.0345378	0.0176296	0.0168669	0.0581857	0.0243745	0.0112368	0.066931	0.00769285	0.0517475	0.00768731	0.0126597	0.0300688	0.0269271	0.0164651	0.0113151	0.0093213	0.020779	0.0785132	SD
																						AQP4 (-/-)
	0.491417	0.508883	0.722883	0.46765	0.509417	0.476317	0.6995	0.41785	0.439233	0.594017	0.458433	0.693167	0.490617	0.535367	0.549567	0.529683	0.417	0.465567	0.518583	0.391983	0.502433	MEAN
	0.0245819	0.0153296	0.0232255	0.0145414	0.0134972	0.0235707	0.0307812	0.0330461	0.014838	0.0280478	0.0139408	0.0160016	0.00799085	0.020994	0.0283553	0.0307934	0.0180887	0.0275477	0.0168412	0.0251718	0.0332572	SD
	D* values computed from 21 ROI																							D*-IVIM
	OLF	CP	LV	WM	HIP	CA/RSP	3V	VIS	SS	PCS	AUD	4V	TH	HY	HAB	PERI	MB	HB	PAG	CB	CoW	Animal code
AQP4(+/+)	6.4139	4.1097	5.3593	4.6904	6.8683	6.4989	5.525	6.2185	7.4262	6.3426	6.3426	5.484	5.8493	6.0195	6.3579	3.9352	5.0618	5.2803	5.1585	5.7237	5.0202	1
	4.6409	3.1651	5.24	4.795	3.7182	6.4692	5.2719	4.9085	4.7634	5.5172	5.6055	5.2411	6.4704	3.7006	4.1643	4.694	5.8717	4.6839	4.8455	3.7824	5.5613	2
	4.6047	5.3121	5.0409	4.9474	5.946	4.6873	5.1058	5.6594	3.735	4.9542	4.9542	5.2482	7.2209	5.1033	7.0414	4.2844	8.0378	8.0952	5.6463	5.0648	6.4374	3
	4.1253	5.4519	5.237	4.9058	6.2568	5.3592	5.1467	8.1574	6.8	5.2896	5.2896	5.4847	6.3467	5.1832	4.6019	4.3096	6.154	7.2677	5.9859	7.7903	5.7536	4
	4.8105	5.1886	5.1368	4.5404	2.967	5.256	5.2061	5.6465	3.9955	4.7406	4.5816	5.4051	3.3719	6.4759	4.0022	4.121	5.0224	4.5523	7.6422	6.2587	6.4521	5
	4.2403	4.2351	5.1144	4.944	4.2857	4.7201	5.1408	5.5559	3.5876	4.4239	4.4091	5.3342	5.8041	6.1432	4.4518	3.9321	4.6298	6.5732	7.006	7.3645	6.4569	6
AQP4(-/-)	4.3132	6.4495	5.187	6.9226	4.9236	7.6312	5.1098	5.9738	6.163	5.6788	5.6851	5.2426	5.8943	6.2412	4.396	5.2473	7.7506	6.4584	5.0247	7.7354	5.7409	7
	5.3618	4.5461	5.057	5.0855	7.344	7.261	5.1002	5.227	6.1106	6.8638	7.1406	5.4475	6.7044	4.058	4.889	4.7139	8.0916	6.6956	4.8479	3.3244	5.0603	8
	6.262	4.8779	5.5453	5.9966	6.1276	7.014	5.2535	4.9802	5.336	5.1854	5.2171	5.7448	5.5519	6.1583	4.759	5.8509	4.7994	5.4545	5.0706	5.8618	5.838	9
	6.0567	5.183	5.4014	5.5951	7.2654	7.9838	5.5355	6.565	9.5657	6.395	6.4486	5.5917	6.898	6.4602	8.2985	5.3253	4.8882	6.2754	5.1788	8.4943	6.5452	10
	4.2579	7.7738	5.2797	6.8733	6.2066	5.3807	5.3016	5.2029	6.5173	7.4606	7.4088	5.4164	6.2946	6.2309	6.353	6.3286	7.4052	8.5668	7.2472	7.6724	6.2002	11
	4.7517	4.6017	5.3424	5.3559	6.2242	6.0683	5.3472	4.9827	4.2237	4.8783	4.8783	5.2953	4.4194	5.7013	5.5716	5.0895	4.8514	5.447	5.3518	5.4481	6.463	12
	OLF	CP	LV	WM	HIP	CA/RSP	3V	VIS	SS	PCS	AUD	4V	TH	HY	HAB	PERI	MB	HB	PAG	CB	CoW
STATISTICS	Mann-Whitney U-test p-value (GraphPad Prism 9.4.1)																					Mann-Whitney U p-value	LEGEND:
	0.484848	0.393939	0.24026	0.0021645	0.179654	0.025974	0.699134	0.484848	0.309524	0.132035	0.132035	0.484848	>0.9999	0.393939	0.393939	0.0021645	0.937229	0.588745	0.393939	0.699134	0.699134		p<0.05
																						AQP4 (+/+)
	4.80593	4.57708	5.18807	4.80383	5.007	5.49845	5.23272	6.02437	5.05128	5.21135	5.1971	5.36622	5.84388	5.43762	5.10325	4.21272	5.79625	6.07543	6.0474	5.9974	5.94692	MEAN
	0.829037	0.895389	0.113248	0.163094	1.56531	0.810583	0.154679	1.125	1.65956	0.676344	0.713625	0.109572	1.31559	1.01076	1.27281	0.286472	1.2375	1.45858	1.08274	1.48342	0.600124	SD
																						AQP4 (-/-)
	5.16722	5.572	5.30213	5.9715	6.34857	6.88983	5.27463	5.4886	6.31938	6.07698	6.12975	5.45638	5.96043	5.80832	5.71118	5.42592	6.29773	6.48295	5.4535	6.42273	5.9746	MEAN
	0.86677	1.28413	0.169973	0.777702	0.88842	0.985086	0.162535	0.641642	1.78912	1.00249	1.03501	0.186989	0.90446	0.893137	1.44485	0.575781	1.60493	1.14562	0.894471	1.92044	0.552129	SD
	Fp values computed from 21 ROI																							Fp-IVIM
	OLF	CP	LV	WM	HIP	CA/RSP	3V	VIS	SS	PCS	AUD	4V	TH	HY	HAB	PERI	MB	HB	PAG	CB	CoW	Animal code
AQP4(+/+)	8.2155	8.2998	27.7677	10.2028	5.5786	8.3498	28.0626	6.1002	7.0409	24.4058	5.7393	23.9642	7.6994	8.0858	11.8857	5.8297	7.1499	5.9908	7.2237	5.2312	21.5702	1
	5.0698	5.0897	24.2042	10.6662	6.4993	6.3026	22.7886	6.9672	4.6082	17.4163	5.8627	17.9757	6.2877	6.5403	12.65	5.0063	5.8108	7.4606	8.1913	3.4547	15.6514	2
	4.8191	5.6389	23.3916	7.62	4.4072	7.6537	20.8796	6.4235	5.0795	16.9923	5.0704	21.3272	5.454	3.6454	7.801	4.6562	6.2853	6.4957	7.0792	5.5484	11.8922	3
	3.6199	6.0795	23.0643	10.0936	6.1543	7.6203	22.5052	5.7646	5.337	21.8748	4.8973	21.3622	6.34	7.735	8.3949	6.1965	7.4322	7.929	5.9124	5.062	14.4856	4
	3.7077	6.3419	20.4777	8.3173	5.1551	5.369	18.6355	5.3046	4.9108	15.0422	4.9139	19.1095	5.0293	6.2199	8.0658	4.852	4.7265	5.6679	4.0439	5.537	15.3059	5
	3.5708	6.1561	21.6361	10.17	4.3328	2.7149	21.8422	5.8891	4.2713	17.1814	4.97	19.7909	4.2122	4.412	9.5839	4.5359	3.9055	4.7233	3.4906	3.727	14.1237	6
AQP4(-/-)	4.8365	5.1051	24.1585	7.7201	3.9419	5.0949	19.9383	4.7979	4.0676	16.7321	4.1609	17.9337	2.721	4.2695	12.4161	3.3106	4.0027	5.3453	4.8896	0.9319	15.1154	7
	3.927	6.2395	23.5641	8.6212	6.1311	8.0322	22.0976	6.908	7.0913	17.1413	4.6946	22.288	4.9598	6.7438	9.869	5.5476	5.9052	4.9607	6.3369	4.2437	15.3707	8
	4.6219	4.3219	21.2999	8.6401	4.3833	4.6641	21.1711	6.1624	4.774	12.5102	4.9373	16.3722	5.5551	6.6154	8.9927	4.1233	5.2744	4.4375	5.8991	4.7897	13.5671	9
	4.6	6.4259	25.8618	11.7419	7.1411	8.0041	24.6152	6.8001	6.1588	20.9313	5.4352	23.4622	7.2506	7.8056	11.5547	5.7561	9.2157	7.299	7.8665	4.5443	18.3672	10
	3.9777	6.1321	23.936	9.6149	4.7403	7.1876	23.3287	5.7096	6.7985	20.3062	5.7209	22.1154	6.1572	6.1367	7.8012	5.2424	5.6487	5.7471	7.1671	4.6761	13.5786	11
	4.6984	5.8856	23.4553	10.8389	6.3675	7.2233	22.8096	5.3527	6.4881	13.7423	5.606	17.5922	7.285	6.0894	6.2639	4.8757	6.8041	5.2784	5.9015	5.4054	16.008	12
	OLF	CP	LV	WM	HIP	CA/RSP	3V	VIS	SS	PCS	AUD	4V	TH	HY	HAB	PERI	MB	HB	PAG	CB	CoW
STATISTICS	Mann-Whitney U-test p-value (GraphPad Prism 9.4.1)																					Mann-Whitney U p-value	LEGEND:
	0.937229	0.699134	0.588745	0.937229	>0.9999	>0.9999	0.699134	0.818182	0.484848	0.309524	0.588745	0.699134	0.937229	>0.9999	0.937229	0.699134	>0.9999	0.179654	>0.9999	0.393939	0.937229		p<0.05
																						AQP4 (+/+)
	4.8338	6.26765	23.4236	9.51165	5.35455	6.33505	22.4523	6.07487	5.20795	18.8188	5.24227	20.5883	5.8371	6.1064	9.73022	5.17943	5.88503	6.37788	5.99018	4.76005	15.5048	MEAN
	1.77925	1.09233	2.50935	1.23187	0.892354	2.07315	3.13065	0.573155	0.971408	3.54403	0.438742	2.10665	1.21357	1.77195	2.07209	0.675628	1.3726	1.18184	1.87587	0.928379	3.25107	SD
																						AQP4 (-/-)
	4.44358	5.68502	23.7126	9.52952	5.45087	6.70103	22.3268	5.95512	5.89638	16.8939	5.09248	19.9606	5.65478	6.27673	9.48293	4.80928	6.1418	5.51133	6.34345	4.09852	15.3345	MEAN
	0.389739	0.811279	1.46814	1.517	1.27133	1.46344	1.64723	0.827923	1.20539	3.38175	0.604368	2.99718	1.70626	1.16224	2.30111	0.932759	1.76152	0.978721	1.04924	1.59791	1.78365	SD
	Fp x D* values computed from 21 ROI																							Fp x D*-IVIM
	OLF	CP	LV	WM	HIP	CA/RSP	3V	VIS	SS	PCS	AUD	4V	TH	HY	HAB	PERI	MB	HB	PAG	CB	CoW	Animal code
AQP4(+/+)	50.6154	42.8985	149.502	53.1233	41.0182	54.4553	150.058	36.3219	45.4768	122.745	39.3699	127.592	44.4139	49.5574	77.8403	22.9741	40.5137	36.9971	37.9944	38.3492	113.552	1
	22.6588	18.7503	120.084	57.3777	28.3368	44.8787	113.598	37.4247	20.4313	99.099	34.0294	95.6613	37.2214	24.7322	58.6623	25.5146	28.7417	42.0037	41.1148	18.0575	79.2588	2
	22.0842	30.3336	113.681	41.4432	33.4028	39.8217	96.0003	43.1083	21.2592	83.3458	29.561	104.925	41.5431	17.3626	77.6367	20.8051	53.7096	44.9807	41.8077	30.3746	78.0508	3
	20.2084	37.9184	118.929	52.153	42.2338	45.9501	112.528	42.7234	43.5942	105.653	26.6357	114.493	37.9098	40.9106	41.5555	26.1044	51.9501	58.5824	37.9334	41.3221	77.5441	4
	22.0419	33.8215	102.549	43.294	20.4707	27.2026	89.7364	30.5597	19.6649	69.056	25.42	96.7041	14.9307	38.1183	36.2449	20.0234	19.2501	28.7714	35.0745	37.8003	88.43	5
	21.7656	29.9858	105.281	51.4022	20.8185	9.7721	102.896	35.5531	19.2262	87.6763	28.2012	105.874	26.7106	24.5548	41.7629	20.7308	8.5991	26.5955	22.1006	32.5615	83.0722	6
AQP4(-/-)	22.5797	32.8407	122.483	44.9745	17.8125	36.1785	97.1957	31.42	22.8093	85.3675	23.0154	91.2524	17.8848	20.4145	68.5574	19.4499	33.5947	31.5831	26.4863	9.1667	87.3647	7
	24.1077	25.0287	118.728	41.044	38.7294	61.1593	108.629	31.4169	41.1861	79.3064	33.2619	115.981	31.2835	33.6043	52.476	21.8038	47.8905	29.4895	29.7122	15.1442	79.4746	8
	30.3309	20.9927	114.569	60.157	26.126	33.8586	105.918	30.4236	25.5277	64.4512	25.5746	91.2212	29.1487	39.6279	53.1401	22.9939	31.0199	25.8179	29.0578	33.623	74.1456	9
	25.8051	34.3672	138.5	72.2532	55.7658	61.5999	131.972	40.9619	57.3201	110.749	32.3721	124.381	43.5786	50.3917	101.488	35.8882	45.051	48.3649	48.4891	37.6189	125.871	10
	18.2721	43.0236	126.99	63.4563	36.8809	35.6117	106.697	31.8713	53.8344	117.475	36.3499	116.862	38.6228	40.7762	42.1428	30.0449	44.3796	53.6269	51.9295	46.6202	83.2744	11
	22.5242	28.8265	123.576	66.1426	46.8973	49.5775	114.375	22.6989	28.8851	70.8896	32.247	86.4979	35.3925	38.1612	48.4657	21.2121	35.1169	32.7478	32.46	29.6938	99.5544	12
	OLF	CP	LV	WM	HIP	CA/RSP	3V	VIS	SS	PCS	AUD	4V	TH	HY	HAB	PERI	MB	HB	PAG	CB	CoW
STATISTICS	Mann-Whitney U-test p-value (GraphPad Prism 9.4.1)																					Mann-Whitney U p-value	LEGEND:
	0.484848	0.818182	0.24026	0.24026	0.588745	0.484848	0.699134	0.0930736	0.132035	0.588745	>0.9999	0.699134	0.818182	0.588745	0.588745	0.588745	0.699134	0.818182	0.818182	0.484848	0.588745		p<0.05
																						AQP4 (+/+)
	26.5624	32.2847	118.338	49.7989	31.0468	37.0134	110.803	37.6152	28.2754	94.5958	30.5362	107.542	33.7882	32.5393	55.6171	22.6921	33.794	39.6551	36.0042	33.0775	86.6514	MEAN
	11.8123	8.23438	16.829	6.14384	9.52832	16.0759	21.3409	4.73306	12.6281	18.7703	5.25413	11.9881	11.0229	12.2136	18.7241	2.61608	18.1288	11.732	7.23403	8.38142	13.7927	SD
																						AQP4 (-/-)
	23.9366	30.8466	124.141	58.0046	37.0353	46.3309	110.798	31.4654	38.2604	88.0397	30.4702	104.366	32.6518	37.1626	61.045	25.2321	39.5088	36.9384	36.3558	28.6445	91.6141	MEAN
	4.00825	7.74182	8.2256	12.3373	13.7078	12.939	11.7602	5.80154	14.8535	21.5225	5.07306	16.4663	8.88558	9.88233	21.6495	6.37295	7.08548	11.2647	10.9521	14.0797	18.8505	SD

## Sheet: X-direction MR DIFFUSION SCORES
	ADC values computed from 21 ROI																							ADC
	OLF	CP	LV	WM	HIP	CA/RSP	3V	VIS	SS	PCS	AUD	4V	TH	HY	HAB	PERI	MB	HB	PAG	CB	CoW	Animal code
AQP4(+/+)	0.4221	0.372	1.4381	0.3782	0.4223	0.4435	1.353	0.3834	0.4146	1.1524	0.4491	1.2049	0.4025	0.4505	0.5615	0.4264	0.4319	0.417	0.4412	0.4044	0.7758	1
	0.3774	0.3343	1.4099	0.311	0.4038	0.3771	1.3504	0.3492	0.3771	1.0045	0.4204	1.0474	0.3933	0.4021	0.5794	0.3907	0.3925	0.3926	0.4306	0.4018	0.6231	2
	0.3743	0.3501	1.3527	0.3316	0.4326	0.3835	1.2838	0.3433	0.3851	0.8935	0.4275	1.2517	0.3776	0.4263	0.4294	0.3854	0.4149	0.4022	0.4153	0.3789	0.376	3
	0.3938	0.3782	1.314	0.3596	0.4478	0.4163	1.4001	0.3695	0.4036	1.1525	0.4473	1.1986	0.4125	0.4615	0.4397	0.4078	0.4005	0.4108	0.4176	0.3918	0.5087	4
	0.4183	0.379	1.3441	0.3518	0.4305	0.3969	1.2758	0.3869	0.4005	1.1691	0.4431	1.3185	0.4113	0.4388	0.3682	0.394	0.4216	0.4225	0.4183	0.4172	0.6181	5
	0.372	0.3454	1.4364	0.3186	0.4096	0.3772	1.4056	0.3407	0.3786	1.1631	0.424	1.2405	0.3859	0.4308	0.3862	0.3805	0.3864	0.39	0.4121	0.4077	0.5712	6
AQP4(-/-)	0.3821	0.3903	1.4341	0.3861	0.4552	0.4246	1.3729	0.4046	0.423	1.053	0.4651	1.3763	0.447	0.4893	0.5598	0.4415	0.4481	0.5117	0.4458	0.4285	0.6586	7
	0.4016	0.3733	1.2323	0.3446	0.426	0.3917	1.2845	0.3552	0.4035	0.9484	0.4485	1.297	0.3957	0.4346	0.5075	0.4098	0.4194	0.4242	0.4191	0.3819	0.4821	8
	0.4218	0.3818	1.4238	0.3576	0.4751	0.4047	1.3498	0.4088	0.4152	0.8282	0.4523	1.1267	0.439	0.4517	0.5172	0.4363	0.451	0.4395	0.4452	0.3919	0.4522	9
	0.4061	0.3786	1.4361	0.3727	0.4517	0.4143	1.3898	0.3939	0.4199	1.172	0.4693	1.337	0.4359	0.4502	0.3867	0.4028	0.4188	0.4462	0.4562	0.4	0.6259	10
	0.4265	0.3845	1.3242	0.3459	0.4612	0.3881	1.2944	0.3918	0.4165	1.0033	0.4703	1.0753	0.4293	0.4615	0.3694	0.4346	0.4278	0.4622	0.4532	0.406	0.6077	11
	0.4023	0.3782	1.3335	0.332	0.4432	0.412	1.3887	0.3918	0.4225	0.9721	0.4577	1.3807	0.4413	0.4472	0.3652	0.4148	0.4417	0.4159	0.4461	0.3882	0.5447	12
	OLF	CP	LV	WM	HIP	CA/RSP	3V	VIS	SS	PCS	AUD	4V	TH	HY	HAB	PERI	MB	HB	PAG	CB	CoW
STATISTICS	Mann-Whitney U-test p-value (GraphPad Prism 9.4.1)																					Mann-Whitney U p-val	LEGEND:
	0.2403	0.0303	0.588745	0.3939	0.025974	0.4848	>0.9999	0.013	0.0087	0.3095	0.0043	0.3095	0.0152	0.1429	0.6991	0.026	0.0411	0.0087	0.0087	0.8182	0.9372		p<0.05
																						AQP4 (+/+)
	0.392983	0.359833	1.38253	0.3418	0.424433	0.399083	1.34478	0.362167	0.39325	1.08918	0.435233	1.21027	0.397183	0.435	0.460733	0.397467	0.407967	0.40585	0.422517	0.4003	0.578817	MEAN
	0.022457	0.0190144	0.0525398	0.0258175	0.0161234	0.0263781	0.0553811	0.0205001	0.0152143	0.114297	0.0126948	0.0905933	0.0140574	0.0206527	0.0891936	0.0169422	0.0177022	0.0131617	0.0111081	0.013339	0.132978	SD
																						AQP4 (-/-)
	0.406733	0.381117	1.364	0.356483	0.452067	0.4059	1.34668	0.391017	0.416767	0.996167	0.460533	1.2655	0.431367	0.45575	0.450967	0.4233	0.434467	0.44995	0.444267	0.399417	0.561867	MEAN
	0.0159432	0.00586836	0.0819117	0.0199701	0.0166252	0.0139813	0.0467371	0.0189374	0.00721212	0.114256	0.0090963	0.13198	0.0184297	0.0185811	0.0866797	0.0161411	0.0143418	0.0343769	0.0131313	0.0166052	0.0827557	SD
	D values computed from 21 ROI																							D-IVIM
	OLF	CP	LV	WM	HIP	CA/RSP	3V	VIS	SS	PCS	AUD	4V	TH	HY	HAB	PERI	MB	HB	PAG	CB	CoW	Animal code
AQP4(+/+)	0.3693	0.3144	0.8429	0.314	0.3454	0.3605	0.784	0.3215	0.34	0.6487	0.3792	0.5676	0.3408	0.378	0.396	0.3447	0.3605	0.3482	0.3659	0.3178	0.4842	1
	0.3444	0.299	0.7048	0.2704	0.3533	0.3372	0.7307	0.3144	0.335	0.5244	0.3703	0.4248	0.3483	0.3621	0.3753	0.347	0.3369	0.331	0.366	0.3589	0.411	2
	0.3202	0.2924	0.6234	0.2596	0.3492	0.2908	0.5926	0.2734	0.3134	0.4142	0.344	0.3373	0.3037	0.354	0.3312	0.3222	0.3247	0.3049	0.332	0.2879	0.232	3
	0.3477	0.3299	0.5873	0.2816	0.3831	0.3592	0.5814	0.2953	0.33	0.4829	0.37	0.4902	0.3425	0.3805	0.2964	0.3428	0.3315	0.3481	0.3463	0.3249	0.3166	4
	0.3634	0.3123	0.6422	0.2369	0.3503	0.3152	0.6217	0.3046	0.3122	0.4608	0.359	0.4017	0.3273	0.3404	0.296	0.315	0.3347	0.3591	0.3346	0.3301	0.3293	5
	0.3282	0.2957	0.7078	0.2657	0.3554	0.3183	0.696	0.2793	0.32	0.4505	0.365	0.3874	0.3131	0.341	0.3254	0.3372	0.3255	0.3246	0.3384	0.3674	0.3292	6
AQP4(-/-)	0.314	0.3056	0.6147	0.2754	0.3576	0.3209	0.6508	0.3133	0.3229	0.54	0.365	0.3691	0.3438	0.3748	0.3435	0.3443	0.3473	0.3962	0.3578	0.3454	0.3743	7
	0.334	0.3112	0.629	0.266	0.3421	0.2942	0.5962	0.2707	0.34	0.4536	0.37	0.3416	0.3256	0.3388	0.2986	0.3341	0.3297	0.3322	0.3287	0.3263	0.2983	8
	0.3761	0.3186	0.6051	0.2766	0.4084	0.3272	0.6731	0.3276	0.345	0.4437	0.382	0.441	0.3717	0.3656	0.3047	0.3664	0.3646	0.3562	0.3698	0.3425	0.2766	9
	0.3327	0.318	0.645	0.3104	0.3803	0.3301	0.6251	0.341	0.345	0.5046	0.386	0.4689	0.3365	0.3579	0.3083	0.3165	0.3368	0.3576	0.3717	0.3155	0.3506	10
	0.3529	0.306	0.6346	0.2535	0.3936	0.2995	0.5884	0.3057	0.33	0.4521	0.3893	0.386	0.3472	0.3819	0.2816	0.3584	0.335	0.3868	0.3604	0.343	0.364	11
	0.3463	0.3265	0.6064	0.2543	0.3752	0.3362	0.6431	0.3256	0.3456	0.4466	0.387	0.4027	0.3755	0.3725	0.3187	0.3592	0.3608	0.3297	0.3715	0.3214	0.329	12
	OLF	CP	LV	WM	HIP	CA/RSP	3V	VIS	SS	PCS	AUD	4V	TH	HY	HAB	PERI	MB	HB	PAG	CB	CoW
STATISTICS	Mann-Whitney U-test p-value (GraphPad Prism 9.4.1)																					Mann-Whitney U p-value	LEGEND:
	0.9372	0.3939	0.2403	>0.9999	0.1797	0.588745	0.6991	0.2403	0.0563	0.6991	0.0455	0.5887	0.1797	0.6991	0.3939	0.3095	0.1797	0.1797	0.2403	>0.9999	0.8182		p<0.05
																						AQP4 (+/+)
	0.345533	0.307283	0.684733	0.271367	0.356117	0.3302	0.667733	0.298083	0.3251	0.496917	0.364583	0.434833	0.329283	0.359333	0.336717	0.334817	0.335633	0.335983	0.3472	0.331167	0.350383	MEAN
	0.019143	0.0142241	0.090571	0.0256194	0.0136607	0.0273022	0.0818526	0.0191147	0.0116047	0.0828142	0.0120887	0.082041	0.0178286	0.0174766	0.0410974	0.0131712	0.0131159	0.0197536	0.0153048	0.0288897	0.086753	SD
																						AQP4 (-/-)
	0.342667	0.314317	0.622467	0.2727	0.3762	0.318017	0.62945	0.313983	0.338083	0.473433	0.379883	0.40155	0.35005	0.36525	0.309233	0.346483	0.3457	0.359783	0.359983	0.33235	0.332133	MEAN
	0.0211279	0.0081879	0.016234	0.0209565	0.0239423	0.0172011	0.0327324	0.0244654	0.00950503	0.039636	0.0100041	0.0468667	0.0197232	0.015328	0.0207938	0.0187484	0.0144047	0.0273479	0.0164309	0.0128622	0.0384005	SD
	D* values computed from 21 ROI																							D*-IVIM
	OLF	CP	LV	WM	HIP	CA/RSP	3V	VIS	SS	PCS	AUD	4V	TH	HY	HAB	PERI	MB	HB	PAG	CB	CoW	Animal code
AQP4(+/+)	3.3553	3.1041	5.0539	3.9213	3.9665	3.9118	5.0082	3.4021	3.7144	4.9517	3.5635	5.0165	4.0228	3.8958	3.9957	3.7448	3.6391	3.5464	3.7288	3.0141	4.1114	1
	3.2843	2.4318	4.8715	2.8384	3.4283	3.411	5.0131	2.8278	3.0697	4.3794	3.291	4.9381	3.3859	3.1731	3.5963	3.0217	3.1656	3.39	3.3436	3.2125	3.8276	2
	3.6207	3.3672	5.5254	3.5694	3.1433	3.5354	5.3992	3.2103	3.5575	4.7596	3.4074	5.4134	3.3549	3.543	3.5023	3.2593	3.7656	3.9081	3.7448	3.7886	3.6736	3
	2.8947	3.3978	5.0816	3.5526	3.8312	3.2838	5.0302	2.979	3.1926	4.9239	3.5091	5.1199	3.4901	3.1601	3.0935	3.5005	3.3467	3.7631	3.8305	3.5021	4.3659	4
	3.0585	3.2891	4.9184	3.2664	3.2418	3.0761	4.9494	3.3887	3.3943	5.0362	3.3084	4.9607	3.3683	3.5714	2.9049	3.5132	3.3334	3.3021	3.2573	3.6857	3.9862	5
	3.124	2.6985	5.3668	3.4266	3.6964	3.6198	5.2416	3.1142	3.3871	5.3467	3.5518	5.3638	3.6051	3.5206	2.7398	3.2794	3.0976	3.6164	3.2338	3.4299	4.2118	6
AQP4(-/-)	3.2994	3.5177	5.1162	3.4669	3.2049	3.536	5.1679	3.4428	3.4039	4.6968	3.4961	5.1357	3.5879	3.6399	4.098	3.5842	3.6905	3.8359	3.5106	3.4867	4.4416	7
	3.7835	3.1078	5.003	4.0013	3.5288	3.3649	5.1301	3.7193	3.4754	4.4696	3.7004	4.9255	3.7234	3.555	3.2754	3.4946	3.7459	3.6392	3.5531	3.2038	4.1439	8
	3.6589	3.517	5.149	3.6352	3.2921	3.5213	5.2165	3.6528	3.3653	4.4326	3.7321	5.0408	3.4079	3.9725	4.007	4.0577	3.7028	4.0605	3.8332	3.3307	4.3566	9
	3.5764	3.3868	5.4322	3.3772	3.5951	3.5823	5.3184	3.4508	3.4737	5.0128	3.563	5.4057	3.5015	3.5932	3.6796	3.5949	3.7918	4.049	3.5296	3.606	4.4253	10
	3.9798	3.4915	5.1423	3.3912	3.7109	3.3042	5.1232	3.3754	3.2697	4.8425	3.6608	4.8686	3.162	3.3877	3.297	3.7261	3.8773	3.7552	3.6238	3.6698	4.4897	11
	2.947	2.8811	4.8168	2.7652	2.9294	3.0166	4.9587	2.683	2.9717	4.4799	3.1039	4.8024	2.958	3.2952	3.4207	3.1233	3.2469	3.1394	3.2891	3.1195	3.6327	12
	OLF	CP	LV	WM	HIP	CA/RSP	3V	VIS	SS	PCS	AUD	4V	TH	HY	HAB	PERI	MB	HB	PAG	CB	CoW
STATISTICS	Mann-Whitney U-test p-value (GraphPad Prism 9.4.1)																					Mann-Whitney U p-value	LEGEND:
	0.132035	0.132035	0.937229	>0.9999	0.484848	0.699134	0.588745	0.132035	0.818182	0.24026	0.24026	0.393939	0.818182	0.393939	0.24026	0.309524	0.0930736	0.309524	0.818182	0.699134	0.179654		p<0.05
																						AQP4 (+/+)
	3.22292	3.04808	5.13627	3.42912	3.55125	3.47298	5.10695	3.15368	3.38593	4.89958	3.43853	5.1354	3.53785	3.47733	3.30542	3.38648	3.39133	3.58768	3.52313	3.43882	4.02942	MEAN
	0.254585	0.396832	0.257647	0.361276	0.331413	0.288153	0.174821	0.227342	0.234426	0.320022	0.12091	0.206531	0.255846	0.276891	0.474365	0.252253	0.262315	0.226541	0.272955	0.289478	0.253933	SD
																						AQP4 (-/-)
	3.54083	3.31698	5.10992	3.4395	3.37687	3.38755	5.15247	3.38735	3.32662	4.6557	3.54272	5.02978	3.39012	3.57392	3.62962	3.5968	3.67587	3.74653	3.55657	3.40275	4.2483	MEAN
	0.368161	0.264339	0.201906	0.403872	0.289576	0.211148	0.118974	0.369867	0.189971	0.236396	0.232301	0.219641	0.283436	0.235079	0.358901	0.304617	0.22085	0.340075	0.176316	0.221213	0.325134	SD
	check olf was rounded
	Fp values computed from 21 ROI																							Fp-IVIM
	OLF	CP	LV	WM	HIP	CA/RSP	3V	VIS	SS	PCS	AUD	4V	TH	HY	HAB	PERI	MB	HB	PAG	CB	CoW	Animal code
AQP4(+/+)	6.7077	9.8419	21.9353	10.3737	9.5248	11.4997	23.1652	9.4361	9.3912	25.5641	8.8979	23.3752	8.111	9.2804	7.4664	11.1297	10.3536	9.6387	10.0149	10.1624	18.5424	1
	6.238	7.0824	20.04	8.6124	7.4048	7.1173	19.5611	7.9607	7.9269	17.151	7.5338	16.7032	8.4299	6.6913	14.1262	7.0358	9.7639	10.2793	8.3666	5.9082	14.4643	2
	6.7677	8.0006	24.7821	9.7277	8.7273	11.9958	25.0641	9.4726	10.5298	22.9523	9.1577	24.6627	9.3551	9.1738	7.6817	7.0029	11.5393	12.0891	10.8871	11.0251	16.2166	3
	7.0779	7.5615	22.6237	13.0763	8.5578	7.1555	25.2572	11.214	9.6546	24.344	10.0557	23.4181	9.914	11.384	9.7055	8.2315	9.9956	9.4986	9.6546	8.8613	19.2175	4
	6.2145	9.3384	25.3626	17.3327	11.1349	10.3567	24.5736	13.1094	11.3364	23.4414	10.3634	24.1631	11.1777	11.2617	12.0087	10.4197	10.2882	9.4938	10.2573	9.5262	20.5296	5
	6.1684	7.0358	23.3874	9.5784	7.177	9.4872	22.7929	9.0961	8.0913	20.1185	8.0353	22.9686	8.3309	10.5619	8.0327	6.6289	7.5554	8.3534	8.8138	6.7064	18.7537	6
AQP4(-/-)	8.5657	10.7247	27.4902	13.7711	10.6349	11.1685	25.9772	10.7004	11.4797	24.6117	11.2802	24.7632	10.953	10.5858	13.4633	10.6423	12.0934	12.2462	9.707	9.4773	20.9701	7
	8.4625	7.7511	23.3595	12.8033	10.2023	12.0296	25.2913	11.4196	9.8311	23.3163	10.8039	26.194	10.2076	11.176	11.575	9.8551	10.8512	10.9807	10.6556	6.9421	18.427	8
	6.0988	9.3344	23.3845	12.2202	8.2493	9.6129	26.208	9.4051	8.916	22.4239	9.0336	20.9677	8.7953	10.5391	11.2791	9.2748	10.63	10.2098	9.2917	7.7119	18.619	9
	8.3743	8.1256	25.545	10.8075	8.6531	11.2065	25.8518	9.2312	9.7434	22.6929	9.3231	24.4712	11.5422	10.2391	8.9395	7.8275	10.2672	9.7123	10.3335	9.2911	17.678	10
	8.54	9.5781	26.2482	11.6473	10.0663	12.6094	28.8016	11.3759	11.8935	25.9389	9.9878	22.9718	10.7433	10.1565	11.5606	9.6988	10.7069	9.3957	11.7651	8.198	19.9122	11
	6.8541	6.5842	22.9102	12.1712	8.9195	9.6293	25.4321	9.4705	10.584	20.853	8.5319	22.4862	8.6066	9.8102	6.126	7.8096	10.2448	10.9981	9.1816	8.5063	16.9761	12
	OLF	CP	LV	WM	HIP	CA/RSP	3V	VIS	SS	PCS	AUD	4V	TH	HY	HAB	PERI	MB	HB	PAG	CB	CoW
STATISTICS	Mann-Whitney U-test p-value (GraphPad Prism 9.4.1)																					Mann-Whitney U p-value	LEGEND:
	0.0930736	0.588745	0.179654	0.309524	0.393939	0.24026	0.0021645	0.699134	0.179654	0.818182	0.309524	0.699134	0.179654	0.818182	0.818182	0.484848	0.179654	0.309524	0.484848	0.588745	0.818182		p<0.05
																						AQP4 (+/+)
	6.52903	8.14343	23.0219	11.4502	8.75443	9.60203	23.4023	10.0481	9.48837	22.2619	9.0073	22.5485	9.21977	9.72552	9.83687	8.40808	9.916	9.89215	9.66572	8.69827	17.954	MEAN
	0.375187	1.18528	1.94637	3.25363	1.45666	2.10111	2.13338	1.82758	1.33618	3.09267	1.10351	2.92781	1.18128	1.76176	2.70745	1.92396	1.30897	1.24274	0.935657	2.00109	2.20964	SD
																						AQP4 (-/-)
	7.8159	8.68302	24.8229	12.2368	9.45423	11.0427	26.2603	10.2671	10.4079	23.3061	9.82675	23.6424	10.1413	10.4178	10.4906	9.18468	10.7989	10.5905	10.1557	8.35445	18.7637	MEAN
	1.06676	1.48177	1.87277	1.00697	0.970342	1.22582	1.29096	1.01943	1.1302	1.77811	1.06327	1.86517	1.19626	0.466303	2.57818	1.14711	0.678998	1.03956	0.976563	0.958462	1.46259	SD
	Fp x D* values computed from 21 ROI																							Fp x D*-IVIM
	OLF	CP	LV	WM	HIP	CA/RSP	3V	VIS	SS	PCS	AUD	4V	TH	HY	HAB	PERI	MB	HB	PAG	CB	CoW	Animal code
AQP4(+/+)	23.6011	35.1723	110.736	45.2291	40.0702	48.7194	118.776	34.4696	36.7002	127.933	33.5703	118.875	32.964	39.0977	32.5807	44.5393	40.3509	37.3506	39.8062	31.0852	79.7949	1
	20.6922	17.8402	97.5768	27.3561	26.9508	24.6632	96.8076	26.3346	26.6687	74.7653	26.486	81.5887	30.4868	24.0512	58.9235	21.9677	33.4118	35.5148	28.7673	20.3423	59.3993	2
	27.5832	28.8427	136.861	35.0991	30.5334	44.3355	135.829	30.8511	41.2293	107.006	32.784	136.708	33.5355	33.0888	30.502	23.4981	46.9576	49.227	45.1824	46.2685	62.1783	3
	20.3915	28.6616	114.058	50.2505	34.9525	23.6821	127.095	35.6379	32.6586	115.789	38.3234	120.165	35.8572	39.2928	33.1747	30.3444	35.8489	37.9118	39.1593	33.3146	79.7242	4
	18.8753	30.9884	123.041	58.3799	39.0442	32.2481	120.482	46.1651	40.3838	114.021	36.2156	120.417	39.8308	42.5039	36.8315	37.945	35.5019	35.4974	35.5216	35.8634	82.0884	5
	19.1335	19.5103	124.842	37.1225	29.1897	37.1682	118.071	30.4922	29.3574	101.028	29.0548	121.885	33.4012	38.6541	24.6309	24.1398	23.5602	30.2236	30.7541	23.1514	80.333	6
AQP4(-/-)	30.2634	39.0448	141.813	50.2134	35.3639	40.923	132.904	37.7932	40.8421	115.168	40.482	131.67	41.6324	39.6423	59.8829	39.1208	45.668	48.2074	35.3124	34.5552	93.5396	7
	32.1309	25.9646	117.186	56.0772	37.3289	42.4024	130.547	44.3327	37.9997	104.564	41.4813	130.302	41.8695	41.9963	41.1151	35.9711	45.0914	41.2984	39.5958	24.8586	80.5838	8
	22.9644	34.7027	119.997	46.3791	30.0493	37.1932	135.775	36.9876	32.3774	99.0565	35.5184	108.86	31.4089	45.6932	47.7071	36.6338	43.1504	41.6891	39.3529	27.1996	82.9835	9
	29.4221	29.737	138.156	39.306	34.4065	41.8602	138.102	33.8904	36.7293	111.304	34.9517	132.184	42.5384	38.9126	36.5111	30.1851	43.3739	41.4401	37.6431	35.3877	80.1803	10
	36.2293	34.1421	135.483	41.5007	39.0751	44.0909	145.899	41.2343	40.89	125.17	37.9577	115.469	35.9665	37.5555	39.2942	38.5484	45.9833	39.4938	44.0381	32.4643	96.3868	11
	20.5797	20.6914	111.275	35.0068	25.0579	29.891	126.149	27.0773	33.3057	91.7644	28.0243	108.09	27.1859	35.0616	21.9797	25.2636	34.4486	35.2024	32.4514	27.9667	63.9405	12
	OLF	CP	LV	WM	HIP	CA/RSP	3V	VIS	SS	PCS	AUD	4V	TH	HY	HAB	PERI	MB	HB	PAG	CB	CoW
STATISTICS	Mann-Whitney U-test p-value (GraphPad Prism 9.4.1)																					Mann-Whitney U p-value	LEGEND:
	0.0411255	0.393939	0.309524	0.818182	>0.9999	0.588745	0.0411255	0.393939	0.484848	0.818182	0.24026	>0.9999	0.393939	0.484848	0.309524	0.393939	0.179654	0.24026	0.818182	0.937229	0.0930736		p<0.05
																						AQP4 (+/+)
	21.7128	26.8359	117.853	42.2395	33.4568	35.1361	119.51	33.9918	34.4997	106.757	32.739	116.606	34.3459	36.1148	36.1072	30.4057	35.9385	37.6209	36.5318	31.6709	73.9197	MEAN
	3.33223	6.76293	13.5148	11.2455	5.4088	10.2223	12.983	6.80986	5.93144	18.106	4.39633	18.3875	3.18495	6.6476	11.8766	9.10802	7.75493	6.30118	6.11798	9.32342	10.2447	SD
																						AQP4 (-/-)
	28.5983	30.7138	127.318	44.7472	33.5469	39.3934	134.896	36.8859	37.024	107.838	36.4026	121.096	36.7669	39.8102	41.0817	34.2871	42.9526	41.2219	38.0656	30.4054	82.9357	MEAN
	5.8344	6.64872	12.7111	7.69328	5.16142	5.19003	6.80464	6.00631	3.63261	11.936	4.85666	11.5761	6.39006	3.6839	12.5408	5.44272	4.32822	4.20213	3.97359	4.31913	11.5526	SD

## Sheet: Y-direction MR DIFFUSION SCORES
	ADC values computed from 21 ROI																							ADC
	OLF	CP	LV	WM	HIP	CA/RSP	3V	VIS	SS	PCS	AUD	4V	TH	HY	HAB	PERI	MB	HB	PAG	CB	CoW	Animal code
AQP4(+/+)	0.391	0.3863	1.3649	0.3655	0.3594	0.3534	1.3509	0.3648	0.374	1.0115	0.354	1.1751	0.3585	0.4055	0.6058	0.339	0.4005	0.4012	0.3754	0.3721	0.6424	1
	0.3753	0.3588	1.3553	0.3609	0.3477	0.3016	1.389	0.3294	0.3326	0.8454	0.3242	0.9567	0.3362	0.3506	0.5769	0.32	0.3576	0.345	0.3694	0.2828	0.4795	2
	0.3976	0.3718	1.2429	0.3753	0.369	0.3199	1.2263	0.3493	0.3474	0.6804	0.338	1.1008	0.3449	0.3209	0.4117	0.327	0.3684	0.3515	0.3493	0.3236	0.3146	3
	0.3917	0.386	1.1808	0.3504	0.361	0.3343	1.3864	0.3478	0.3543	0.9821	0.3346	1.0853	0.3388	0.3672	0.4753	0.333	0.3851	0.3894	0.3577	0.3218	0.4075	4
	0.3774	0.3845	1.2196	0.316	0.3637	0.3259	1.2426	0.3395	0.343	0.9822	0.3352	1.2045	0.3351	0.3276	0.3223	0.336	0.385	0.373	0.3519	0.3328	0.5189	5
	0.4022	0.3883	1.4067	0.3234	0.3576	0.3178	1.3808	0.3203	0.3312	1.041	0.3239	1.2358	0.3485	0.3536	0.392	0.347	0.3644	0.372	0.3556	0.3317	0.4811	6
AQP4(-/-)	0.4068	0.4098	1.2738	0.4974	0.373	0.3513	1.3443	0.375	0.3794	0.8407	0.3629	1.2725	0.3737	0.383	0.5472	0.351	0.4158	0.4439	0.371	0.373	0.5233	7
	0.3696	0.3785	1.1726	0.3682	0.3644	0.3214	1.2858	0.3474	0.352	0.8152	0.3366	1.2171	0.3432	0.3435	0.5134	0.334	0.4011	0.3971	0.3605	0.3175	0.3999	8
	0.3798	0.3816	1.3422	0.4004	0.3669	0.3445	1.3374	0.3748	0.3754	0.7151	0.3502	1.0841	0.3713	0.3567	0.5197	0.33	0.3852	0.4047	0.3793	0.3092	0.3727	9
	0.4091	0.4036	1.3502	0.3663	0.3755	0.3331	1.4068	0.3506	0.3496	0.9854	0.3595	1.2428	0.36	0.3612	0.4033	0.363	0.4028	0.3943	0.3851	0.3786	0.5016	10
	0.412	0.4095	1.2875	0.3719	0.3849	0.341	1.3554	0.3885	0.3885	0.8984	0.3583	1.0154	0.3665	0.3606	0.3809	0.355	0.4077	0.3902	0.3793	0.3446	0.4765	11
	0.3936	0.4023	1.2231	0.4367	0.3928	0.3524	1.4285	0.3896	0.3896	0.8622	0.3678	1.2862	0.3828	0.3643	0.3628	0.364	0.4212	0.4156	0.3957	0.352	0.4786	12
	OLF	CP	LV	WM	HIP	CA/RSP	3V	VIS	SS	PCS	AUD	4V	TH	HY	HAB	PERI	MB	HB	PAG	CB	CoW
STATISTICS	Mann-Whitney U-test p-value (GraphPad Prism 9.4.1)																					Mann-Whitney U p-val	LEGEND:
	0.3939	0.132035	0.588745	0.0152	0.0087	0.179654	0.699134	0.026	0.026	0.309524	0.0152	0.309524	0.0152	0.484848	0.818182	0.0931	0.0043	0.0152	0.013	0.393939	0.699134		p<0.05
																						AQP4 (+/+)
	0.3892	0.379283	1.29503	0.348583	0.359733	0.325483	1.32933	0.34185	0.347083	0.923767	0.334983	1.12637	0.343667	0.354233	0.464	0.333667	0.376833	0.372017	0.359883	0.327467	0.474	MEAN
	0.0107842	0.0116484	0.0921306	0.0238781	0.00710877	0.0174234	0.0749256	0.0157641	0.0158456	0.136841	0.0110458	0.10157	0.00891889	0.0304317	0.110435	0.0094163	0.0160672	0.0214739	0.0102975	0.0285681	0.109805	SD
																						AQP4 (-/-)
	0.39515	0.39755	1.2749	0.406817	0.37625	0.340617	1.3597	0.370983	0.372417	0.852833	0.355883	1.18635	0.36625	0.36155	0.45455	0.3495	0.405633	0.407633	0.378483	0.345817	0.458767	MEAN
	0.0173498	0.0139236	0.068568	0.0519453	0.0108415	0.0117812	0.0513147	0.0181976	0.0176014	0.0897462	0.0110843	0.110637	0.0136039	0.0127907	0.0809454	0.0144603	0.0126179	0.0198997	0.0120077	0.0282702	0.0592956	SD
	D values computed from 21 ROI																							D-IVIM
	OLF	CP	LV	WM	HIP	CA/RSP	3V	VIS	SS	PCS	AUD	4V	TH	HY	HAB	PERI	MB	HB	PAG	CB	CoW	Animal code
AQP4(+/+)	0.2895	0.2713	0.6709	0.2417	0.2475	0.243	0.5962	0.2513	0.2816	0.49	0.2462	0.4711	0.2565	0.2765	0.3236	0.2459	0.284	0.2945	0.2707	0.2626	0.3486	1
	0.2984	0.2672	0.5252	0.2247	0.2443	0.2143	0.5577	0.226	0.2554	0.3416	0.238	0.3992	0.233	0.2603	0.2597	0.238	0.2494	0.2383	0.2628	0.2099	0.2616	2
	0.3082	0.2709	0.4927	0.2543	0.2639	0.2137	0.48	0.2328	0.233	0.331	0.2366	0.3133	0.243	0.2224	0.2033	0.25	0.2471	0.2338	0.2518	0.2233	0.16	3
	0.3062	0.2756	0.4766	0.1936	0.2526	0.2397	0.5502	0.2413	0.2507	0.3672	0.2361	0.3402	0.2298	0.246	0.2622	0.2357	0.2721	0.2581	0.2532	0.2362	0.187	4
	0.3021	0.2748	0.4886	0.207	0.2599	0.2232	0.4879	0.2383	0.252	0.382	0.2458	0.3388	0.2362	0.2194	0.2323	0.2431	0.2783	0.2705	0.2486	0.2458	0.2325	5
	0.3084	0.2768	0.5302	0.1824	0.259	0.2007	0.491	0.216	0.2429	0.3692	0.2303	0.3932	0.247	0.2572	0.2635	0.262	0.2687	0.2603	0.2415	0.2544	0.2145	6
AQP4(-/-)	0.2991	0.2966	0.5264	0.3102	0.2847	0.247	0.5705	0.2736	0.2767	0.4191	0.2615	0.3077	0.2706	0.2602	0.2699	0.2617	0.2922	0.3238	0.2686	0.2812	0.2628	7
	0.2792	0.267	0.4943	0.2126	0.248	0.1858	0.4687	0.2062	0.231	0.3437	0.2312	0.3122	0.2179	0.2083	0.2444	0.2225	0.2623	0.2802	0.2455	0.2105	0.1832	8
	0.3156	0.2913	0.5332	0.2723	0.2732	0.2657	0.5566	0.2698	0.2998	0.3395	0.2636	0.3794	0.2807	0.2678	0.2707	0.256	0.2853	0.3163	0.2916	0.253	0.1905	9
	0.3065	0.257	0.49	0.2188	0.26	0.214	0.4637	0.2314	0.2549	0.3642	0.2578	0.2894	0.2418	0.2431	0.2489	0.253	0.2632	0.2666	0.2604	0.2962	0.2258	10
	0.3029	0.2814	0.4914	0.2164	0.2693	0.2068	0.4262	0.2498	0.2577	0.3693	0.2508	0.3163	0.2497	0.25	0.26	0.2558	0.2572	0.2737	0.2625	0.2551	0.2323	11
	0.3175	0.3121	0.501	0.2826	0.285	0.2455	0.5459	0.2728	0.2771	0.3294	0.2743	0.4219	0.2878	0.2796	0.2688	0.2836	0.3075	0.2949	0.3045	0.2464	0.2473	12
	OLF	CP	LV	WM	HIP	CA/RSP	3V	VIS	SS	PCS	AUD	4V	TH	HY	HAB	PERI	MB	HB	PAG	CB	CoW
STATISTICS	Mann-Whitney U-test p-value (GraphPad Prism 9.4.1)																					Mann-Whitney U p-value	LEGEND:
	0.6991	0.3939	0.9372	0.179654	0.0411	0.6991	0.3939	0.3095	0.3095	0.5887	0.0411	0.1797	0.2403	0.8182	0.5887	0.2403	0.3939	0.026	0.2403	0.2403	>0.9999		p<0.05
																						AQP4 (+/+)
	0.302133	0.272767	0.5307	0.217283	0.254533	0.222433	0.527167	0.234283	0.2526	0.380167	0.238833	0.375967	0.240917	0.246967	0.257433	0.245783	0.2666	0.25925	0.254767	0.2387	0.234033	MEAN
	0.00729593	0.00360703	0.0718746	0.027946	0.0076735	0.0163491	0.0475458	0.0123291	0.016316	0.0570261	0.00614448	0.0574018	0.00992661	0.0224459	0.040012	0.00948924	0.0151684	0.0221728	0.0104278	0.0197026	0.0662758	SD
																						AQP4 (-/-)
	0.303467	0.284233	0.50605	0.25215	0.270033	0.227467	0.505267	0.2506	0.2662	0.360867	0.256533	0.337817	0.258083	0.2515	0.26045	0.255433	0.27795	0.292583	0.272183	0.257067	0.22365	MEAN
	0.013868	0.02013	0.0189052	0.0416113	0.0143931	0.0300437	0.0597629	0.0273171	0.0236516	0.0322947	0.0146049	0.0513216	0.0264628	0.0247792	0.0114481	0.0196143	0.0201163	0.0233555	0.0218121	0.0297203	0.0313261	SD
	D* values computed from 21 ROI																							D*-IVIM
	OLF	CP	LV	WM	HIP	CA/RSP	3V	VIS	SS	PCS	AUD	4V	TH	HY	HAB	PERI	MB	HB	PAG	CB	CoW	Animal code
AQP4(+/+)	3.3887	3.6916	3.9023	3.9388	3.4504	3.8883	4.3724	3.6953	4.2437	4.2374	3.578	3.9307	3.9628	3.8625	3.9355	3.5069	3.8704	3.5938	3.4833	3.5342	4.1039	1
	3.3465	3.5305	4.0394	4.0155	3.4129	3.2792	4.2557	3.7313	3.3534	4.4777	3.5967	4.1337	3.4676	3.6284	3.8373	3.661	3.5634	3.4822	3.6168	3.4991	4.1008	2
	3.2895	3.4359	4.112	3.5604	3.2552	3.4472	4.0835	3.506	3.2907	4.0125	3.2454	3.9591	3.5728	3.5289	3.765	3.2146	3.6155	3.6375	3.332	3.2036	3.5366	3
	3.3386	3.7241	4.1727	4.0472	3.7428	3.5548	4.2219	3.5393	3.5693	4.3699	3.5796	4.0824	3.5499	3.861	3.598	3.1632	3.8607	4.0387	3.4423	3.1484	3.9564	4
	3.292	3.7308	4.1634	3.5317	3.5597	3.681	4.1118	3.9047	3.4043	4.3476	3.6123	4.0419	3.6645	3.2734	2.9953	3.1328	3.8532	4.015	3.7943	3.4135	4.139	5
	3.2943	3.9881	4.126	4.0499	3.536	3.8843	4.1463	4.1388	3.7712	4.8145	3.6586	4.21	3.8365	3.8606	3.2639	3.5488	3.9408	4.2256	3.8212	3.7141	4.3233	6
AQP4(-/-)	3.1408	3.2796	3.856	3.8985	3.1659	3.474	4.0466	3.4427	3.5157	3.9808	3.332	3.9448	3.3042	3.1944	3.5286	3.2588	3.4186	3.3914	3.4431	3.3226	3.938	7
	3.2564	3.8236	4.2201	4.5483	4.2375	4.0045	4.3744	3.5854	4.036	4.597	3.7898	4.2913	4.0293	4.243	4.7605	3.5067	4.2063	3.8958	3.6167	3.868	4.3782	8
	3.3215	3.4884	4.0284	3.9077	3.4608	3.5164	4.1654	3.4817	3.397	4.0958	3.668	3.9334	3.7561	3.4483	3.6963	3.4934	3.609	3.4618	3.5849	3.4479	4.0703	9
	3.2425	3.3526	4.2392	3.5448	3.2754	3.0513	4.2439	3.3749	3.2646	4.3083	3.2839	4.1601	3.463	3.3485	3.2472	3.0975	3.5168	3.3696	3.4127	3.1914	3.6814	10
	3.3773	3.9413	4.32	3.9225	3.8672	3.8295	4.4215	3.8397	3.8817	4.271	3.782	4.244	3.8577	3.7148	3.8142	3.7553	4.098	4.1238	4.0265	3.7973	4.4084	11
	3.181	3.263	4.1377	3.9286	3.6346	3.6436	4.0626	3.5869	3.5199	4.2681	3.5449	4.0132	3.4191	3.5138	3.7331	3.1644	3.4104	3.5957	3.5072	3.268	3.8832	12
	OLF	CP	LV	WM	HIP	CA/RSP	3V	VIS	SS	PCS	AUD	4V	TH	HY	HAB	PERI	MB	HB	PAG	CB	CoW
STATISTICS	Mann-Whitney U-test p-value (GraphPad Prism 9.4.1)																					Mann-Whitney U p-value	LEGEND:
	0.132035	0.309524	0.484848	0.699134	0.699134	0.937229	0.937229	0.132035	>0.9999	0.393939	0.699134	0.699134	0.699134	0.393939	0.937229	0.937229	0.484848	0.24026	>0.9999	0.818182	0.937229		p<0.05
																						AQP4 (+/+)
	3.32493	3.6835	4.08597	3.85725	3.49283	3.62247	4.1986	3.75257	3.60543	4.3766	3.5451	4.05963	3.67568	3.66913	3.56583	3.37122	3.784	3.83213	3.58165	3.41882	4.02667	MEAN
	0.0399915	0.190498	0.101687	0.244537	0.163387	0.24322	0.107263	0.237626	0.357547	0.266387	0.149769	0.105508	0.188748	0.24033	0.365437	0.227404	0.154777	0.299354	0.197614	0.212802	0.267273	SD
																						AQP4 (-/-)
	3.25325	3.52475	4.13357	3.9584	3.6069	3.58655	4.21907	3.55188	3.60248	4.2535	3.56677	4.0978	3.63823	3.57713	3.79665	3.37935	3.70985	3.63968	3.59852	3.48253	4.05992	MEAN
	0.0872204	0.290652	0.16824	0.324771	0.397969	0.328951	0.156736	0.163314	0.295513	0.210119	0.219966	0.155107	0.284709	0.369242	0.513258	0.249295	0.351869	0.305984	0.223923	0.284684	0.287131	SD
	Fp values computed from 21 ROI																							Fp-IVIM
	OLF	CP	LV	WM	HIP	CA/RSP	3V	VIS	SS	PCS	AUD	4V	TH	HY	HAB	PERI	MB	HB	PAG	CB	CoW	Animal code
AQP4(+/+)	12.8612	15.1234	30.02	15.8329	14.5202	14.4042	35.5893	14.7247	15.3203	32.1322	13.8992	29.394	13.7365	17.0314	18.247	12.1884	13.7121	12.3251	12.4576	12.4182	25.3668	1
	6.9007	10.5437	27.261	14.4384	10.2922	10.626	29.1795	12.4455	10.3354	23.9774	10.1499	20.5617	11.3319	10.9102	17.518	9.1353	10.9362	10.2736	10.0559	7.988	19.7755	2
	7.286	10.2878	28.8022	13.5586	9.6795	12.9796	28.4755	11.177	12.4106	21.0079	10.0698	24.7499	10.6764	10.3032	16.0713	7.7616	12.3703	12.8276	10.4113	9.3062	16.7513	3
	7.306	11.6955	28.2944	17.1484	10.9737	9.7717	29.3642	13.1564	12.7913	27.0039	10.7024	23.5682	12.808	13.3214	19.2256	9.6992	11.2469	14.5666	10.5766	7.7518	20.0855	4
	8.036	11.704	29.6135	14.0496	11.3469	11.9675	27.62	13.4344	12.7262	28.1618	10.664	26.6877	12.7296	11.2279	9.2994	8.4504	12.9821	12.229	11.7096	10.3926	21.4958	5
	10.0195	12.7354	32.754	17.8495	13.599	16.0379	33.3976	15.6538	13.2757	31.9096	12.5595	27.9827	13.3174	11.7868	17.3169	10.9314	10.9205	14.7099	13.5775	12.7434	24.9202	6
AQP4(-/-)	12.2351	12.9133	29.0018	16.6055	9.3652	12.3022	31.6342	12.54	13.5581	24.5352	11.5603	25.5666	10.4267	13.001	15.4418	8.4648	13.8218	11.2391	10.8952	8.4964	23.4979	7
	9.0544	12.877	30.8034	20.4996	13.8018	17.2964	32.0546	16.9325	15.7719	28.6569	12.2483	27.0588	15.9128	16.1624	20.0254	12.746	14.9485	13.8231	11.4255	12.4653	22.9685	8
	6.5158	10.4906	28.5659	15.2889	10.7995	9.6148	28.4558	11.5614	10.9776	21.3911	10.1581	21.8599	10.2094	9.9484	17.3712	8.1855	10.2243	10.0164	10.3862	7.979	19.897	9
	9.3316	11.989	29.3481	15.0982	11.9327	9.9143	29.4158	11.9785	12.4022	24.6997	9.8284	25.562	11.8687	10.7553	13.191	8.9182	13.6647	10.0956	11.2726	7.471	19.0077	10
	7.9032	12.0567	31.0636	16.8222	11.5275	14.584	33.0568	14.8574	13.36	27.4194	11.1195	27.5254	11.9355	11.6367	10.1922	9.8214	16.043	12.7723	13.2324	9.3994	20.8646	11
	5.9895	7.7661	27.0816	14.7284	11.3698	11.1346	29.8056	12.9811	12.5917	22.487	10.0087	25.8034	9.4339	9.132	8.3789	8.1616	11.1076	11.5874	9.0697	9.5857	18.9712	12
	OLF	CP	LV	WM	HIP	CA/RSP	3V	VIS	SS	PCS	AUD	4V	TH	HY	HAB	PERI	MB	HB	PAG	CB	CoW
STATISTICS	Mann-Whitney U-test p-value (GraphPad Prism 9.4.1)																					Mann-Whitney U p-value	LEGEND:
	0.818182	0.937229	>0.9999	0.484848	0.937229	0.937229	0.699134	0.937229	0.818182	0.484848	0.588745	>0.9999	0.24026	0.484848	0.393939	0.818182	0.309524	0.179654	0.699134	0.588745	0.699134		p<0.05
																						AQP4 (+/+)
	8.7349	12.015	29.4575	15.4796	11.7353	12.6311	30.6044	13.432	12.8099	27.3655	11.3408	25.4907	12.4333	12.4301	16.2797	9.69438	12.028	12.822	11.4648	10.1	21.3992	MEAN
	2.30956	1.76226	1.88756	1.75188	1.91148	2.34557	3.15146	1.59635	1.60056	4.38254	1.54466	3.20682	1.18389	2.47626	3.57563	1.63377	1.17408	1.65534	1.37061	2.14718	3.2898	SD
																						AQP4 (-/-)
	8.50493	11.3488	29.3107	16.5071	11.4661	12.4744	30.7371	13.4751	13.1103	24.8649	10.8205	25.5627	11.6312	11.7726	14.1001	9.38292	13.3017	11.589	11.0469	9.2328	20.8678	MEAN
	2.26034	1.96297	1.47792	2.12987	1.4522	2.97517	1.77423	2.04376	1.59159	2.78433	0.975436	1.99295	2.31437	2.53508	4.3918	1.75994	2.23219	1.49781	1.36671	1.77874	1.96621	SD
	Fp x D* values computed from 21 ROI																							Fp x D*-IVIM
	OLF	CP	LV	WM	HIP	CA/RSP	3V	VIS	SS	PCS	AUD	4V	TH	HY	HAB	PERI	MB	HB	PAG	CB	CoW	Animal code
AQP4(+/+)	46.1276	58.4991	117.524	65.2674	52.1927	57.9891	155.161	54.1582	66.1693	136.605	51.4792	115.68	55.8272	68.2712	75.3575	42.6166	56.0464	44.5872	44.9621	45.5324	107.374	1
	24.6018	39.3704	109.45	60.6502	37.4378	36.5471	122.98	48.7354	34.9118	104.277	38.1155	84.6637	40.2898	42.0397	69.3621	34.2008	40.0198	39.1653	38.1995	28.2463	83.126	2
	24.4257	36.2607	118.572	50.6581	33.9459	46.5033	115.536	42.2446	42.9266	87.94	33.4085	97.8454	38.8564	36.2881	63.8072	26.6878	46.2059	48.268	35.1846	30.5319	63.1037	3
	24.7984	44.4528	118.517	72.4932	42.41	36.0674	123.051	48.2872	47.5444	115.216	39.7772	94.6338	48.1984	53.029	73.2254	32.087	44.8853	60.4255	38.8427	25.9834	80.4928	4
	29.0993	44.4669	122.699	53.4002	43.5895	45.7114	112.465	54.0523	45.3104	119.002	39.5519	106.801	48.9852	37.2563	29.7235	27.7621	51.8243	50.9157	47.3098	38.6793	88.9668	5
	32.8107	52.831	134.395	75.6472	51.5465	66.5473	136.783	65.5385	51.8716	142.725	48.1705	116.687	54.4247	48.7343	60.5274	41.6588	45.8236	62.6342	55.4268	49.8259	110.825	6
AQP4(-/-)	38.4537	42.3249	111.864	66.7016	30.9159	43.475	127.382	43.8093	49.2381	98.1171	39.8631	100.569	35.8358	44.1858	57.2354	29.591	47.9899	39.1138	38.0939	30.002	94.468	7
	29.9636	51.2745	129.909	95.5411	60.9095	71.9559	137.363	61.7456	64.8526	132.893	48.357	115.45	65.3769	74.1786	98.4655	46.53	65.4199	57.5579	43.8134	51.4114	104.795	8
	22.4325	38.5148	114.829	63.6378	38.8471	35.825	116.476	40.8134	39.6444	89.5762	38.3348	85.0844	40.4596	34.6207	70.535	28.8699	38.4365	36.5106	40.8252	27.6975	83.2483	9
	31.9163	41.4217	123.324	52.1416	40.0133	31.3511	122.834	43.4049	42.224	102.662	33.5153	104.198	42.9146	37.222	44.8932	29.7533	51.3782	35.9991	39.9088	25.7875	71.7056	10
	27.0526	49.8956	133.303	69.5353	46.7552	59.186	144.44	59.8522	55.2406	116.622	44.0305	116.391	46.5123	44.9045	40.4874	38.551	67.6501	54.8537	54.9338	36.9554	93.8094	11
	20.4061	26.472	112.309	60.8912	43.8365	42.5839	120.038	47.5857	46.0169	94.6405	36.5458	104.326	33.5671	34.1013	33.0804	27.0278	39.0557	43.2791	34.051	31.7208	76.3085	12
	OLF	CP	LV	WM	HIP	CA/RSP	3V	VIS	SS	PCS	AUD	4V	TH	HY	HAB	PERI	MB	HB	PAG	CB	CoW
STATISTICS	Mann-Whitney U-test p-value (GraphPad Prism 9.4.1)																					Mann-Whitney U p-value	LEGEND:
	0.818182	0.484848	>0.9999	0.699134	>0.9999	0.699134	0.818182	0.484848	0.937229	0.309524	0.937229	0.937229	0.393939	0.484848	0.588745	0.937229	0.818182	0.179654	0.699134	0.699134	0.937229		p<0.05
																						AQP4 (+/+)
	30.3106	45.9802	120.193	63.0194	43.5204	48.2276	127.663	52.1694	48.1224	117.627	41.7505	102.718	47.7636	47.6031	62.0005	34.1688	47.4675	50.9993	43.3209	36.4665	88.9813	MEAN
	8.43211	8.32391	8.19699	10.052	7.34212	12.0375	15.8782	7.89429	10.4834	20.2845	6.7438	12.6084	7.01811	12.0327	16.7681	6.76478	5.63931	9.0868	7.45171	9.78005	17.8405	SD
																						AQP4 (-/-)
	28.3708	41.6506	120.923	68.0748	43.5463	47.3961	128.089	49.5352	49.5361	105.752	40.1078	104.336	44.1111	44.8688	57.4495	33.3872	51.655	44.5524	41.9377	33.9291	87.3891	MEAN
	6.59105	8.95913	9.30781	14.7212	10.0594	15.3105	10.7812	9.00856	9.28356	16.1723	5.34395	11.4339	11.423	15.0928	24.0533	7.58765	12.5881	9.42644	7.13787	9.38303	12.4916	SD

## Sheet: DWI MICROBEADS PHANTOM
DWI and IVIM DWI scores
	FINE			MODERATE			COARSE			Plain water phantom
Measurement code	MEAN	SD	no. of scans	MEAN	SD	no. of scans	MEAN	SD	no. of scans	MEAN	SD	no. of scans
1	0.704	0.041	3	0.89	0.036	3	1.225	0.095	3	1.995	0.03	3	ADC
2	0.705	0.047	3	0.886	0.034	3	1.25	0.094	3	1.989	0.031	3
3	0.714	0.047	3	0.902	0.038	3	1.247	0.091	3	2.027	0.032	3
4	0.715	0.046	3	0.917	0.04	3	1.244	0.093	3	2.046	0.031	3				AVERAGE
5	0.721	0.078	3	0.919	0.043	3	1.261	0.093	3							FINE	MODERATE	COARSE	PLAIN
6	0.714	0.078	3	0.912	0.036	3	1.255	0.094	3							0.712167	0.904333	1.247	2.01425
1	0.654	0.051		0.838	0.045		1.03	0.076		1.562	0.048		D-IVIM
2	0.642	0.048		0.839	0.041		1.04	0.078		1.544	0.045
3	0.648	0.049		0.842	0.045		1.05	0.078		1.551	0.045
4	0.664	0.05		0.871	0.044		1.049	0.078		1.538	0.046					AVERAGE
5	0.644	0.069		0.863	0.05		1.047	0.075								FINE	MODERATE	COARSE	PLAIN
6	0.617	0.071		0.881	0.039		1.052	0.08								0.644833	0.855667	1.04467	1.54875
1	4.766	1.992		4.112	1.512		4.267	1.581		5.167	1.114		D* -IVIM
2	4.474	2.095		4.679	2.054		4.541	1.629		5.204	0.852
3	4.667	2.164		4.388	1.868		4.15	1.667		5.395	0.648
4	4.106	1.847		4.147	1.414		4.508	1.736		5.345	0.593					AVERAGE
5	5.712	8.113		4.372	1.509		4.352	1.556								FINE	MODERATE	COARSE	PLAIN
6	4.997	5.632		4.925	2.313		4.131	1.59								4.787	4.43717	4.32483	5.27775
1	6.538	4.114		4.7	3.035		8.67	4.758		14.688	3.385		Fp - IVIM
2	7.768	4.397		4.5	3.076		9.75	4.989		15.678	2.993
3	8.692	4.949		5.42	3.513		8.9	4.795		16.625	3.013
4	7	4.247		4.34	2.77		8.99	4.695		17.68	3.203					AVERAGE
5	9.89	5.92		5.33	3.669		9.45	4.834								FINE	MODERATE	COARSE	PLAIN
6	11	6.382		3.75	2.545		9.2	4.833								8.48133	4.67333	9.16	16.1677
1	33.065	25.829		20.215	14.984		41.191	27.146		79.2	24.269		Fp x D* - IVIM
2	34.915	26.586		21.524	18.826		49.094	28.717		83.382	20.44
3	42.844	33.128		25.765	20.639		41.6	27.908		91.528	18.635
4	29.696	22.714		18.97	14.379		43.36	27.378		96.248	18.961					AVERAGE
5	60.752	95.853		24.556	18.539		45.43	27.541								FINE	MODERATE	COARSE	PLAIN
6	60.682	82.57		18.365	16.982		42.379	27.59								43.659	21.5658	43.8423	87.5895

## Sheet: uCT and T1 CORRELATION PHANTOM
Microbeads phantom - separate measurements for DWI and T1 relaxation
	µCT	MRI	ADC [um2/s]			D [um2/s]			D* [um2/s]
Microbeads + 1μM/ml Gadavis	free fluid volume rate [%]	mean T1 time [ms]	mean	SD	no. of meas.	mean	SD	no. of meas.	mean	SD	no. of meas.
Fine	19.07	124.161	0.5602	0.02732	4	0.5117	0.03061	4	4.508	0.5258	4
Moderate	22.9	180.673	0.892	0.01707	5	0.8508	0.007402	5	3.378	0.3913	5
Coarse	24.96	201.371	1.073	0.01553	8	0.9257	0.00757	8	3.858	0.2087	8
H20 + 1μM/ml Gadavist (plain)		256.301	2.038	0.03492	7	1.546	0.01081	7	5.33	0.1047	7
Pearson r (DWI vs T1)
r			0.9547			0.9771			0.4204
95% confidence interval			-0.07798 to 0.9991			0.2631 to 0.9995			-0.9072 to 0.9839
R squared			0.9114			0.9547			0.1768
P value
P (two-tailed)			0.0453			0.0229			0.5796
P value summary			*			*			ns
Significant? (alpha = 0.05)			Yes			Yes			No
Comparisons			4			4			4
Pearson r (ADC and D vs. µCT)
r	0.9698
95% confidence interval	0.7433 to 0.9968
R squared	0.9406
P value
P (two-tailed)	0.0014
P value summary	**
Significant? (alpha = 0.05)	Yes
Comparisons	6

## Sheet: DCE MRI
The table below includes relative increases (see 'Materials and methods' for normalization scheme) in the MR signal magnitude after injection of gadoliunium tracer into the CSF space via cisterna magna in 5 AQP4 KO and 6 WT littermate mice. MRI perfromed using 3D-FISP at 9.4 Tesla.
ROI (total n=21)	Cisterna magna (CM)											Circle of Willis (CoW)											Thalamus (TH)											Striatum (WM)											Caudate (CP)
GENOTYPE	Aqp4 (+/+)						Aqp4 (-/-)					Aqp4 (+/+)						Aqp4 (-/-)					Aqp4 (+/+)						Aqp4 (-/-)					Aqp4 (+/+)						Aqp4 (-/-)					Aqp4 (+/+)
ANIMAL CODE no.	1	2	3	4	5	6	1	2	3	4	5	1	2	3	4	5	6	1	2	3	4	5	1	2	3	4	5	6	1	2	3	4	5	1	2	3	4	5	6	1	2	3	4	5	1	2	3	4	5
Time [min]	2.01153	2.17391	2.29365	7.40305	5.49485	6.0628	2.24347	2.256	4.80875	4.36067	3.99493	2.47293	1.5074	2.00573	5.54015	5.28657	4.37092	2.71841	2.18701	5.6731	4.56823	4.50136	1.6774	1.00614	1.34873	2.82584	2.6893	3.04767	1.82781	0.973599	3.5926	3.48093	3.12645	1.54658	2.05451	1.46166	3.93768	3.54165	3.31021	1.53309	2.02472	3.89086	3.59673	3.28441	1.51656	1.52904	1.5398	3.02625	3.1538
baseline -1	1.99168	2.57276	2.25051	6.00909	5.27587	5.5635	3.07769	2.18856	3.57062	4.5515	4.41252	1.84316	2.26267	2.40906	5.59487	5.21337	4.82932	2.2649	1.61123	4.56386	4.35168	4.03324	0.98828	1.75077	1.49782	3.93179	3.69078	3.22329	1.53561	1.59044	2.75333	3.44451	3.01391	1.14903	1.6778	1.42262	3.37407	3.19295	3.29706	1.52787	1.52828	3.14755	3.38284	3.27812	1.01453	1.25833	1.50674	3.14663	2.9563
baseline 0	1.51763	3.26779	1.79071	5.0428	4.71286	5.22937	1.67356	1.51853	5.15558	4.71194	3.81343	1.19822	2.0056	1.6104	5.2331	4.38239	4.58405	2.13021	1.87135	4.28349	5.34097	4.22261	1.20838	1.10175	1.211	3.24881	2.64458	2.79475	0.716383	1.38628	3.09126	2.56943	2.59505	1.24201	0.879028	1.4972	3.3262	3.37365	2.90716	0.971643	0.811859	2.85758	3.10709	2.47518	1.20629	1.24299	1.20178	3.46452	3.11784
1	3.64488	4.73954	15.1056	7.87059	16.7143	11.9854	12.6504	12.5726	8.00889	8.03744	7.28402	2.24118	2.59086	2.39403	7.3091	7.6559	6.79803	3.61225	2.81113	7.58002	7.80413	6.59662	1.73288	1.40765	1.89309	4.92495	4.5454	4.25071	1.18682	1.37701	4.46565	4.75535	3.93222	2.11856	2.49277	1.96387	4.26511	5.25253	4.37957	1.76246	1.289	4.13644	4.944	4.52324	1.808	1.94874	2.02973	4.02081	4.94436
2	35.3836	7.23649	115.89	157.653	138.964	138.232	66.8571	71.2465	146.326	82.4584	30.4341	2.50451	2.78605	3.37549	6.72139	11.3052	6.88596	9.9597	7.45828	7.06099	7.83311	6.90919	1.76556	1.81976	1.89285	5.08585	3.94883	4.26067	2.32151	1.54595	4.33688	5.0467	4.42632	1.85292	1.79004	2.49893	4.45796	4.69256	4.61699	1.64013	1.30701	4.21084	5.21228	4.31602	1.233	1.86693	2.18474	4.50306	4.03177
3	84.1936	130.954	100.598	317.857	193.482	219.466	97.5029	95.8226	235.828	151.973	69.8884	19.379	2.50982	6.00543	11.8349	50.4498	14.6853	52.1534	33.609	17.8916	18.8803	44.808	2.80299	1.53877	1.45286	5.13582	4.74962	4.52116	2.38956	2.3443	4.77757	4.17342	4.59846	2.17861	1.46311	2.07051	4.47518	4.45083	4.47218	2.7601	1.4307	4.14339	4.65387	4.19013	1.61897	1.35821	1.97215	4.23994	4.13686
4	111.082	201.467	93.0638	315.893	196.726	228.268	99.5751	108.772	212.893	130.352	112.274	48.0006	22.3298	35.5744	50.9981	108.577	41.7159	63.5114	55.2473	77.3706	61.6716	111.888	1.93973	1.83639	2.3138	4.81929	4.10009	4.54945	1.56069	2.2131	4.27392	4.94669	4.50196	2.27015	1.55777	3.28899	5.02556	5.30589	4.02195	1.68615	1.6752	4.39593	4.60322	5.42529	1.45567	2.12128	2.7772	4.53932	4.28049
5	127.049	177.225	83.9056	325.142	194.801	222.859	127.649	121.342	213.84	147.784	148.255	59.474	86.2926	82.7745	119.094	142.067	79.0182	70.4652	47.9046	128.128	97.0667	125.899	1.15584	1.18135	2.14661	5.67786	4.30329	4.85433	2.14907	2.15234	4.75281	4.1722	5.19999	3.37256	1.91235	3.16341	4.66649	4.9849	4.82353	3.28798	2.09671	5.37253	4.96386	5.85631	1.12633	1.78496	2.30615	4.86065	3.99062
6	133.677	167.07	77.3624	329.921	195.956	215.682	133.264	115.241	220.166	158.75	154.639	77.0959	129.261	121.172	166.02	142.661	120.641	79.7139	59.6413	139.141	105.787	146.353	2.23866	1.35536	2.00302	3.99158	4.898	6.03236	2.00849	1.35121	6.03528	4.68028	5.48116	4.11212	2.41608	3.8159	6.36693	6.58338	6.10716	3.67287	2.21342	7.04524	5.17849	7.73174	1.52576	2.08668	2.11625	5.26011	4.90838
7	131.073	161.734	81.2039	337.326	197.975	217.456	140.099	111.865	227.8	166.439	162.758	77.1639	130.73	138.171	173.05	136.211	142.676	89.7707	69.9597	142.177	114.946	165.014	1.96301	1.66927	2.06202	5.14712	5.37472	5.5174	1.85339	1.44239	5.85003	5.62813	4.78264	6.17755	2.73625	5.78556	4.91733	7.60582	6.19374	5.2619	2.94886	8.62593	6.44799	10.4549	2.21831	1.98791	1.7132	4.12733	5.62946
8	134.344	162.031	81.6706	345.096	202.556	228.699	142.294	111.743	240.859	171.582	168.967	82.4117	129.881	124.74	173.432	141.37	157.477	92.2543	72.2456	162.065	124.604	175.789	3.57723	1.57247	2.37508	6.42022	4.77487	5.51632	2.23195	1.89395	5.60892	5.00529	6.69025	7.27485	4.06971	8.69044	6.42905	8.91604	6.74747	6.42035	3.78697	9.33286	7.42802	12.5392	3.05685	1.55386	2.30328	5.65906	5.39972
9	153.664	161.908	84.8514	349.08	207.658	244.914	144.147	113.883	244.383	176.687	172.87	83.9089	119.491	119.457	182.129	147.02	169.843	89.5914	70.5784	178.406	132.411	182.64	2.54598	1.23652	2.0906	6.19832	9.55315	5.56115	2.97607	1.97568	6.1357	5.97189	8.20876	9.09442	6.11006	10.6035	7.25273	12.4605	7.865	8.18079	5.3339	10.9935	7.73227	14.9396	2.68729	1.2727	1.67274	5.2377	8.3552
10	181.489	162.332	85.9278	358.118	213.768	253.595	147.586	116.142	248.62	178.115	173.922	88.8621	113.323	129.043	187.193	153.428	182.498	87.1447	72.6647	184.972	138.853	184.549	2.49247	2.67033	2.55296	7.45062	5.85538	6.8705	2.51067	1.99561	6.05597	6.142	4.88881	12.1701	6.69647	14.469	8.89515	12.821	8.98588	9.19008	6.62822	13.5873	9.12899	15.0962	2.62446	1.07524	1.7774	5.27421	6.08357
11	189.712	163.086	93.5588	361.59	223.563	257.931	149.812	119.675	252.22	182.178	176.612	90.5257	107.134	112.911	192.274	160.201	191.853	85.0514	72.9553	187.91	144.34	188.01	2.49366	1.78966	3.12867	7.2021	5.99496	8.39506	2.57294	2.86821	5.97635	7.43743	10.147	13.6498	9.54868	17.0938	10.4522	14.7247	11.3409	10.2603	8.86507	16.7071	10.9139	21.8988	2.80969	1.38682	2.4082	4.82324	5.77362
12	196.278	160.297	87.0578	370.077	229.43	262.67	153.567	123.05	257.469	186.69	176.843	91.0546	101.763	98.8916	196.312	166.19	197.847	88.0274	72.408	187.333	147.752	189.806	2.9708	2.00176	3.66212	7.65241	7.68991	8.03685	3.1854	2.75229	6.83722	6.60247	9.10937	15.6631	12.4358	19.2928	12.9064	17.239	14.7726	11.6423	11.0421	17.8513	12.6799	24.8183	2.81583	1.13996	2.32651	4.43503	6.07572
13	206.381	170.658	90.7317	374.459	246.735	270.954	157.614	130.595	270.937	189.92	184.17	95.6982	99.4128	95.0255	200.295	172.147	201.41	89.4454	72.8333	187.6	151.933	188.587	4.21821	2.60651	4.24176	8.68395	8.33835	10.4682	2.38514	2.28463	7.4171	9.01292	6.38491	20.4097	14.5724	22.8743	16.6116	20.1415	15.78	13.0212	12.7105	20.9716	15.1281	24.9347	4.16301	1.00173	3.01787	5.01709	5.90403
14	229.094	207.228	128.529	401.985	301.852	299.016	157.754	153.713	297.746	211.823	214.945	103.699	105.709	89.9467	201.699	177.497	205.326	91.4241	75.4631	193.891	153.664	189.411	5.26258	2.94261	2.85223	8.54409	11.504	12.7913	3.39624	3.64995	7.99385	8.00722	8.91095	24.3941	18.1193	26.4206	19.6251	27.9456	17.6869	15.624	16.4577	24.9489	18.5372	31.6956	4.60337	1.25191	2.41119	4.23375	8.75113
15	248.221	259.687	167.011	433.318	336.571	331.172	188.508	180.493	334.892	241.3	249.246	109.187	113.691	88.3935	203.867	180.305	206.592	95.2497	82.6999	200.919	157.626	196.037	4.56175	3.45625	4.88451	10.2068	15.7051	12.8491	4.65453	4.98451	9.18071	9.00261	10.1561	28.5954	22.1601	31.1938	23.8664	29.7506	20.0987	18.7161	20.1685	28.5816	21.2612	35.0705	4.35789	1.52039	3.56862	4.71173	8.88183
16	264.948	302.424	188.977	465.657	358.551	352.72	219.441	201.603	362.879	263.801	268.729	113.162	121.336	92.2437	210.017	187.344	211.11	98.9217	90.8472	206.86	161.988	206.035	6.0487	4.4253	4.69559	10.9718	11.9747	14.4146	5.20248	4.47739	9.38579	8.79059	8.33069	34.4615	26.8251	37.1011	28.2767	32.4847	25.8773	21.3232	23.7112	32.0864	24.5118	39.6529	6.78149	1.66224	4.59538	4.60246	6.30556
17	283.517	336.3	207.671	482.585	376.416	369.826	260.876	213.118	384.948	283.808	289.596	117.173	128.224	98.9868	220.847	192.329	211.547	99.9416	98.0529	209.984	164.705	212.995	4.93782	5.94248	5.41475	11.9067	13.4645	15.4651	5.63172	5.74462	10.793	9.98635	13.2156	34.3491	31.7859	39.8319	32.2717	35.9972	28.783	23.6508	27.4065	36.4678	26.9039	46.4013	3.42606	2.2892	5.17556	4.24414	6.79002
18	299.61	376.483	219.445	497.98	391.922	377.968	275.074	225.768	402.897	288.462	303.592	117.186	136.878	105.018	229.858	199.946	214.758	100.282	102.962	213.924	169.77	214.382	7.02211	7.69543	8.35318	12.627	16.4452	15.8716	6.74501	6.69843	10.5449	10.1858	13.8988	41.3951	36.7868	48.6422	37.11	41.1099	32.3291	26.8694	32.1716	39.1378	30.6575	49.0673	5.01742	2.87163	7.22771	4.35415	7.0167
19	318.342	415.641	231.143	506.733	406.367	387.719	288.193	241.36	418.493	293.615	307.977	121.795	140.838	106.605	237.818	206.583	213.367	103.128	106.16	216.186	171.993	213.99	7.45867	9.50674	7.67945	14.8425	17.349	18.9776	7.14694	7.57122	10.8489	10.8865	13.8836	43.2644	40.89	52.3067	43.0851	45.5101	36.6167	29.3325	36.2926	43.0711	32.7533	52.7125	3.78951	4.38695	7.14612	4.62969	7.40086
20	329.483	427.58	237.633	512.253	415.709	394.517	306.115	251.782	429.1	297.171	311.101	123.298	149.068	115.065	238.681	209.941	214.078	106.716	110.638	219.179	176.502	215.281	6.81261	9.90654	8.09402	15.1455	17.0338	20.2544	7.75501	8.51703	11.7725	10.9321	13.7129	45.3855	47.275	56.506	47.0944	48.5795	38.6786	33.2926	39.5337	46.419	35.8684	56.3979	3.49272	4.21937	6.04178	4.37836	7.07662
21	339.176	430.049	249.093	518.132	424.538	400.676	313.984	258.074	438.663	299.295	318.769	126.579	155.68	127.092	240.837	210.78	219.147	110.096	115.027	220.951	180.825	218.554	7.40127	11.2618	9.42548	17.2331	18.6912	21.0513	9.52749	9.59033	14.4892	11.9125	14.3264	51.4876	51.6481	61.4591	52.0601	54.0457	44.888	36.7336	43.8672	51.0724	38.3028	63.1848	3.91117	3.90654	6.79402	4.50799	7.49566
22	327.952	423.778	255.009	515.2	426.942	394.279	320.31	259.778	446.499	303.473	325.186	122.055	154.948	131.522	242.273	214.521	217.358	113.31	118.863	220.509	185.642	217.323	9.77622	13.9336	9.84026	19.5573	19.6265	22.5947	11.1187	11.0707	13.829	12.9167	14.5803	56.0614	54.2593	65.47	58.1399	56.1412	48.5442	38.8958	47.8822	53.1801	41.7158	61.8901	4.61495	4.24109	6.9796	5.09464	6.90095
23	334.306	430.629	259.254	513.549	429.772	398.979	331.868	262.243	455.288	308.539	328.161	128.054	160.126	137.076	243.854	219.193	222.19	114.417	122.251	222.876	189.822	220.618	10.4743	14.364	10.8957	20.1223	20.3917	25.0053	11.9343	10.9095	14.0297	13.3533	17.6911	57.9662	59.2033	69.7486	62.3926	60.2285	53.9424	42.7243	52.7789	57.4319	43.7772	67.3637	4.30291	2.78814	7.04451	5.25855	6.89677
24	335.818	431.882	265.866	507.716	433.083	405.025	343.655	264.2	457.847	307.591	322.291	134.001	161.822	139.491	245.954	224.505	223.214	114.983	128.382	223.668	190.722	224.595	10.598	18.505	12.4554	21.9893	23.2158	27.2726	8.78984	13.9867	14.6472	14.9097	21.1739	62.6307	62.5251	74.482	68.2119	65.1333	56.0114	43.4433	55.6316	59.3187	45.9229	69.5722	3.56687	3.70994	7.96938	5.73668	8.01211
25	336.876	429.103	268.591	501.582	434.55	401.265	342.775	263.807	464.033	304.749	321.456	138.065	162.986	141.904	248.436	232.598	223.202	119.876	132.947	224.198	192.359	225.627	11.6321	16.4845	13.9247	23.6045	24.0095	29.1186	14.6683	14.5113	17.2694	15.8473	18.1765	64.1108	71.0694	78.8177	71.2343	68.5881	60.1202	50.6839	57.2885	63.7891	47.3593	70.832	4.27188	5.56837	8.17041	5.84744	8.27662
26	340.995	419.814	271.716	490.385	435.971	392.109	342.405	261.327	464.915	299.845	315.693	143.166	165.874	142.851	254.255	237.297	227.222	120.573	135.078	226.231	190.725	228.349	12.5704	17.3521	15.4933	27.1111	25.9903	30.814	13.611	17.1021	17.2458	16.7059	17.9474	67.1263	71.7477	83.0481	76.8273	73.5482	63.3315	52.1209	61.1235	67.051	49.28	72.0869	4.55506	4.55129	8.1648	6.90852	9.38516
27	341.389	412.085	274.516	486.463	435.587	381.032	341.385	258.171	463.867	295.401	306.7	141.213	168.636	144.117	256.654	238.363	227.936	124.635	136.009	227.853	190.294	233.516	14.2728	21.3426	16.6389	27.3817	26.2873	31.0809	15.0008	17.1411	17.8529	17.2813	21.6947	70.7767	74.5311	86.8487	80.4473	75.6123	66.5832	54.2246	62.9931	69.4058	51.6821	76.2561	6.61464	4.57925	9.3137	7.44492	8.91859
28	339.828	399.244	275.869	479.566	428.198	371.163	344.112	255.49	459.198	292.113	297.815	147.547	175.563	147.993	260.166	242.498	230.583	125.558	137.966	229.217	185.467	237	13.4135	22.748	17.5899	28.6984	29.5967	36.0848	17.8234	17.8981	19.207	16.3059	21.4447	74.2915	76.7103	90.9022	83.5718	77.9264	72.8367	58.6835	64.6777	71.9957	52.2769	76.2282	5.57658	4.18568	9.032	7.70914	9.85769
29	341.515	389.499	278.495	475.472	428.854	357.769	338.913	249.538	457.843	291.404	292.451	146.414	170.499	149.045	265.648	243.508	236.216	129.065	137.672	231.866	184.941	240.045	12.6579	23.4255	18.3793	31.454	29.2508	35.855	18.6544	19.3337	20.2298	19.7568	22.1183	74.4908	79.8304	94.2418	86.9222	80.8842	73.488	58.3746	67.7046	73.4525	55.9748	80.6324	4.67663	4.54565	9.8808	8.24454	10.1606
30	339.512	381.804	278.044	464.492	426.324	349.951	328.633	243.85	454.213	285.954	285.931	151.973	173.875	150.094	268.256	249.904	241.618	128.76	137.265	235.861	182.075	239.63	16.8029	25.0192	20.4407	31.6159	30.882	38.6625	20.5359	20.8045	20.6435	17.961	25.2814	76.7496	82.2911	97.7079	89.172	82.6361	77.0627	58.2232	68.9695	77.0931	55.4932	80.1691	6.42802	4.90301	10.8087	8.77324	10.9035
31	336.56	371.258	277.751	460.393	419.163	344.981	318.809	237.351	448.412	285.746	275.957	154.312	179.05	152.427	270.195	244.064	247.224	136.179	136.182	239.557	180.032	238.27	17.0809	24.6039	22.3144	34.0009	31.5443	39.4991	19.444	21.3456	22.6514	19.4846	25.3001	78.2655	84.9275	101.245	92.8965	83.8693	79.4843	60.6466	71.3455	79.0143	57.8861	81.8895	5.65309	5.25448	11.7619	9.92091	10.7432
32	329.805	363.367	276.636	449.284	420.942	332.656	318.11	232.014	443.601	276.193	269.113	155.635	182.679	155.922	273.22	256.525	251.084	139.255	135.235	241.633	177.291	235	18.4168	26.7708	22.8148	35.4547	33.5529	41.3431	20.1433	22.3972	22.8293	20.8066	25.1674	79.2128	86.6784	103.771	95.3427	85.9206	82.7155	63.1256	71.6153	80.2659	57.3186	82.2732	5.91895	6.42369	12.0978	10.7473	11.8676
33	322.016	352.334	275.03	441.714	416.285	327.439	307.11	225.399	438.17	272.364	263.203	157.308	191.602	158.466	274.666	254.071	257.127	134.534	132.443	243.577	174.752	233.266	19.7466	25.4938	24.8883	37.8684	34.5441	43.2929	21.1972	22.6619	24.373	21.6939	26.6446	81.1198	90.9751	107.09	97.0539	88.2418	85.0571	63.1303	72.9239	82.2002	58.3978	83.9129	6.27269	5.55789	13.2929	10.9695	12.0325
34	321.991	339.064	277.491	434.531	407.361	324.83	299.632	219.833	431.545	268.068	254.494	155.924	192.01	164.171	275.977	252.898	262.676	147.493	129.596	245.536	170.924	230.766	18.6452	30.0494	25.6574	38.4196	35.1977	45.5657	24.3417	24.0143	26.0755	21.9609	26.0416	82.4133	89.2729	108.567	99.5095	89.3799	89.2266	68.2135	74.4533	84.0122	58.8072	84.4209	7.0321	6.89426	14.1039	11.9085	12.1053
35	315.222	337.874	274.141	426.145	396.914	319.657	293.602	214.089	428.227	264.287	249.145	162.721	190.817	167.563	275.429	249.306	263.882	149.299	127.523	246.817	169.816	224.5	20.5695	25.9611	27.2459	41.3705	37.2014	46.6536	22.4685	25.3844	26.6278	22.333	27.1513	82.8754	92.2345	110.977	101.305	90.6062	90.7647	66.7059	74.4071	84.9458	60.2183	83.8299	7.09375	6.89969	14.8586	12.8153	13.3099
36	312.872	335.904	271.761	416.753	386.846	316.438	293.392	209.9	419.969	262.399	243.27	165.372	206.642	172.592	274.775	244.725	268.732	152.367	126.023	248.33	165.165	220.539	23.211	30.2168	28.244	43.0293	37.4632	47.3831	22.4486	25.3034	26.818	22.4086	29.0612	85.5744	94.0858	112.304	102.638	91.2746	92.2897	69.002	75.6931	87.4036	60.0315	84.6913	8.29981	7.7634	16.6346	13.7107	13.0471
37	303.618	317.525	270.603	404.989	391.218	308.697	288.084	204.057	413.802	256.123	237.815	168.359	208.844	176.778	274.344	240.888	269.145	155.989	122.809	249.515	162.606	214.323	22.341	28.996	30.3384	43.5875	38.2279	49.9963	27.1706	26.6934	27.9632	24.0231	30.2246	86.7947	92.7734	114.962	102.796	93.0262	94.7955	68.5464	76.212	88.1124	60.1799	86.0983	9.18097	6.82321	17.3961	13.8903	13.9007
38	298.317	309.033	267.867	397.379	378.593	302.704	281.004	199.961	408.144	260.175	234.053	168.5	215.987	183.458	273.667	235.083	269.026	154.769	119.552	245.996	160.275	211.944	23.8947	33.2851	31.6114	44.7354	40.465	51.3594	25.76	26.6592	29.5759	26.0987	31.4323	86.6501	93.5359	116.254	104.615	93.9482	95.6253	71.5986	76.4137	88.5999	63.7802	86.7331	8.13926	7.31765	18.5492	15.0067	14.6115
39	294.801	306.64	270.72	386.925	366.817	299.309	273.119	197.281	399.542	251.146	227.367	172.993	202.362	188.357	272.917	231.949	270.361	154.798	117.896	247.747	157.723	204.824	25.5453	32.194	32.0265	47.1722	41.8884	53.8545	26.6535	27.4964	31.8837	24.8774	30.971	89.0643	93.431	117.067	105.753	94.398	98.2585	73.2589	77.3471	90.8052	62.4884	87.0293	9.6733	7.05917	19.3479	15.7765	15.3357
40	290.893	304.899	264.695	380.517	357.805	294.211	266.274	192.65	394.542	251.859	222.887	172.334	201.098	193.37	273.546	224.715	269.289	151.359	113.709	245.266	154.727	203.899	25.0506	32.5211	33.4779	48.1911	42.387	54.4683	26.4514	29.2151	31.1424	25.7789	32.1614	88.8602	90.6964	118.376	107.063	95.3134	99.0691	72.3683	77.9771	90.9469	64.1259	86.7425	9.65165	7.12409	21.3633	16.9229	15.6271
41	291.102	299.602	263.618	371.904	350.01	290.286	265.438	187.825	388.432	246.461	215.644	174.129	212.601	198.741	271.607	220.474	266.685	146.465	111.298	244.48	152.274	201.499	26.2814	33.5836	34.4523	49.6856	43.0029	56.3076	28.0242	28.9433	32.2148	26.7692	33.546	89.4537	96.4869	119.991	107.185	96.0843	100.778	72.9778	77.7655	92.0269	63.885	88.0167	10.0206	9.57522	21.5751	17.5575	16.3204
42	287.91	300.238	261.756	363.582	347.362	285.289	257.703	186.256	382.322	242.805	210.425	172.78	215.428	199.709	269.851	218.589	263.232	146.481	109.059	243.26	148.471	197.313	27.3217	36.3666	35.6405	50.8053	45.0986	57.8953	30.4867	29.9077	33.1696	26.1979	35.4439	90.6792	96.698	120.974	108.758	96.2617	100.917	72.9837	78.1371	92.0777	63.3726	87.6791	10.7298	8.90181	22.5663	18.7297	17.1895
43	283.052	291.111	259.769	355.334	344.778	280.198	251.124	182.806	372.882	247.403	210.626	173.27	208.526	203.043	268.915	216.117	261.197	141.429	105.698	242.195	143.724	196.42	28.6044	34.3208	36.4541	52.9279	46.4232	58.8148	29.6763	29.8811	33.7601	28.0258	35.6899	90.7233	97.1065	120.741	108.884	98.2264	102.309	74.2879	77.629	92.7686	64.7116	87.8042	11.6675	9.85989	23.3495	19.5654	18.0542
44	277.66	292.78	258.287	347.615	339.165	277.751	247.624	180.246	373.371	243.528	204.675	169.849	203.413	202.288	268.758	211.009	256.941	141.858	104.834	241.005	142.593	193.284	29.6122	37.0095	37.7741	54.1411	46.5869	60.2774	33.4289	31.2054	35.4868	29.7892	34.6148	90.8144	96.942	122.177	110.71	96.5687	103.383	74.0501	78.2778	93.7189	64.8078	87.7067	12.2433	10.5936	25.1845	20.8594	18.047
45	274.509	287.895	253.096	343.018	335.821	272.657	245.115	176.533	360.511	234.895	199.698	169.912	196.296	204.216	265.05	208.625	253.676	141.034	102.187	239.608	137.575	187.914	29.7204	40.822	39.0388	55.0304	48.9308	61.0821	32.1031	32.8103	35.6816	29.6266	37.0615	91.3336	97.7391	122.982	109.465	97.093	103.027	73.6805	78.5123	94.0465	61.9902	87.6865	12.2875	11.9146	26.4212	20.7252	18.7935
46	269.074	278.87	252.432	332.939	325.733	269.232	240.951	174.109	355.008	238.05	194.67	166.217	192.056	203.632	263.408	204.944	248.382	139.297	98.8483	237.138	136.432	186.107	30.6821	40.0467	39.6072	55.1873	48.8623	63.052	32.9439	33.1414	37.2756	30.3358	38.749	91.946	96.452	123.166	109.644	97.8914	104.194	73.1661	78.3496	95.7117	65.7789	89.0687	13.4056	11.6184	27.1098	21.8115	19.731
47	263.095	281.719	246.559	323.354	332.928	265.933	236.034	171.562	348.096	238.1	190.734	164.751	204.333	202.058	260.51	201.512	245.495	135.427	96.6958	234.076	135.911	181.792	31.4009	40.2701	41.332	56.7228	47.4555	64.4503	31.2922	33.0106	37.5177	32.1261	38.688	92.7739	98.4472	123.466	109.549	98.2307	105.561	73.2728	79.0532	94.812	65.7666	88.8476	14.0117	11.2944	28.9266	22.2334	20.0546
48	255.345	282.909	244.672	317.325	326.419	264.285	230.486	170.231	340.179	234.593	188.569	162.673	188.997	201.204	258.299	200.947	242.188	136.641	95.2599	234.494	132.096	177.68	32.0999	39.1022	42.142	58.7677	51.6866	65.6982	32.4331	33.147	38.7034	30.1552	38.781	92.716	95.3827	123.932	111.308	98.7995	105.087	72.8063	77.6293	95.6761	64.1078	87.2521	14.0828	12.7772	29.3906	23.2425	21.119
49	249.36	277.089	242.635	307.762	314.1	258.788	228.163	167.244	333.71	233.338	186.485	158.422	192.857	199.071	257.999	197.38	235.865	133.998	93.7706	231.316	131.255	175.737	33.3617	42.7117	43.0349	59.9765	51.4967	66.0306	34.2392	34.1588	39.555	32.2335	38.924	91.5505	95.3334	124.234	111.025	97.5114	105.089	72.5724	78.4948	95.5605	62.5453	87.2273	14.4197	13.7672	30.1744	24.3927	21.7036
50	241.818	278.64	238.927	302.932	310.473	255.148	225.314	164.508	328.575	227.769	182.409	156	197.806	200.566	254.063	192.473	232.617	128.739	91.6032	229.003	127.654	173.86	33.2142	42.5463	45.2034	59.5554	51.4482	66.5335	34.3912	33.7255	38.5481	32.0797	38.984	91.6193	95.8439	124.317	110.954	97.5359	105.231	74.4212	78.5072	95.4152	63.3392	87.5888	15.0653	13.9152	31.5401	24.8013	21.9763
51	238.731	270.621	235.246	300.906	311.263	251.577	224.334	162.387	319.924	234.914	181.33	152.598	188.048	198.199	252.371	191.893	228.919	125.682	90.2319	225.996	126.345	171.753	33.031	42.6224	45.7842	61.2453	52.5982	68.4622	35.362	34.2211	40.0809	31.2801	40.1592	91.6707	97.6773	124.972	111.574	98.5728	105.333	72.7941	78.0025	95.625	63.86	86.5178	15.3467	13.3231	32.7077	26.3286	22.8699
52	232.26	264.851	235.336	292.366	308.228	251.001	218.986	159.596	313.71	233.236	178.523	150.217	194.257	195.258	250.389	189.477	224.251	128.702	89.4549	224.963	125.107	168.254	33.1112	43.0746	46.1499	62.5767	53.4203	69.9571	36.0875	34.6235	40.9736	33.7342	39.9912	91.0502	97.6202	124.921	111.855	98.3574	105.936	73.5945	78.246	96.1883	63.7302	87.0785	15.3593	14.7515	33.2992	27.1	23.3562
53	227.83	265.149	230.648	286.78	305.617	246.779	221.08	157.453	308.87	238.055	175.038	148.19	196.802	195.612	247.977	186.133	217.144	126.997	87.6446	221.941	123.996	166.868	34.762	46.7555	47.2399	62.6486	55.0832	68.7795	36.0128	35.2713	41.5552	32.579	41.2998	91.3983	97.2162	125.637	110.514	98.2967	105.021	74.3271	78.2709	96.1005	64.0999	85.8384	16.2856	16.0285	34.4398	26.9619	24.3726
54	221.469	260.976	227.039	282.363	291.103	243.072	215.273	157.113	303.213	236.632	172.001	146.113	187.213	192.403	244.89	184.585	216.367	123.776	86.1002	217.714	124.306	162.408	35.2958	41.6984	48.298	63.1411	54.2397	70.2512	37.2645	36.752	42.6423	32.5293	40.4336	90.7473	97.3386	125.031	110.591	96.6914	104.947	74.7461	77.7787	95.6904	63.8838	84.8285	16.3585	15.2178	36.0597	27.5226	23.8968
55	217.334	257.36	221.679	278.132	294.317	239.235	210.828	154.406	295.426	235.415	169.765	143.553	182.913	190.297	243.241	180.238	212.018	124.486	85.5791	216.656	120.82	161.164	36.4571	47.218	48.0244	64.7073	54.5126	70.8632	38.608	36.6496	43.5738	34.512	41.9555	91.7734	97.0765	124.437	111.066	97.1481	105.257	73.5576	78.1336	96.5954	64.1158	84.4852	17.4838	16.6901	37.0898	28.8058	24.7587
56	214.922	252.352	220.453	272.166	280.856	236.073	205.457	154.34	291.277	234.172	168.34	140.49	175.598	190.437	240.548	180.92	208.035	124.554	84.5338	213.933	121.711	158.217	36.1223	44.5487	48.8513	65.7339	54.4192	71.1627	36.6223	37.3271	44.1645	32.8393	41.8667	91.3156	93.5701	124.216	111.205	96.757	105.198	73.144	77.2792	95.9138	63.9668	84.3439	17.8482	15.7952	36.8046	29.7888	24.9193
57	210.517	251.485	220.006	265.322	283.985	233.586	209.53	152.582	285.608	232.714	165.428	137.977	181.933	188.567	236.172	178.236	205.307	123.474	83.0498	210.323	119.09	154.465	36.0375	48.286	49.5995	65.571	56.9015	71.4462	39.0535	37.2738	43.8718	34.1158	42.2059	90.889	96.4657	124.681	111.041	96.2178	104.245	73.1907	77.3323	95.0939	63.8169	84.6292	18.238	16.9051	38.5593	30.1087	26.0571
58	207.407	250.265	216.957	263.546	277.354	230.049	207.544	149.623	278.117	231.436	167.286	136.982	175.61	185.144	234.677	174.698	201.232	125.443	82.3659	209.284	118.187	153.236	37.0341	46.8503	50.2459	65.835	56.7503	72.0079	42.4042	37.3841	43.6992	33.9698	42.7214	90.8883	96.9537	123.929	110.972	95.7936	103.628	74.9577	77.3698	94.6112	63.9972	83.594	18.8393	17.7502	39.3116	30.6805	26.3998
59	203.044	242.221	213.124	256.117	270.787	227.792	207.252	148.689	275.179	231.379	163.406	134.562	178.054	185.161	232.18	173.204	200.567	123.685	80.6474	207.318	117.982	151.337	38.3525	47.0675	52.1576	66.9497	56.5086	72.9002	38.9995	38.8864	46.3695	35.2493	43.8293	90.9459	96.2288	123.28	110.398	95.4679	104.154	73.7521	76.3268	95.5808	64.9988	84.875	19.3099	18.8142	40.3309	31.2091	26.8119
60	195.926	241.629	208.283	252.645	269.956	225.516	201.754	146.018	267.222	227.632	158.626	131.238	166.993	183.079	229.066	173.172	197.387	123.091	80.2372	204.085	116.09	147.214	37.4445	45.4087	52.9728	69.0586	57.4884	73.2468	39.2487	38.7089	45.8436	34.6316	44.3647	91.0583	94.3001	124.449	111.426	95.8213	103.769	72.4516	77.0435	95.541	63.9253	82.5357	19.9722	17.4941	41.4013	32.5515	27.6067
61	195.812	236.733	203.087	251.237	270.353	221.894	200.329	145.075	265.013	225.485	157.559	131.45	176.714	182.891	225.785	170.621	195.126	125.184	77.861	201.657	114.474	147.804	38.515	48.8612	52.6732	68.2339	57.7443	73.0934	40.5506	38.7411	46.2855	35.8749	44.2451	90.514	96.4292	122.823	110.621	94.9821	104.389	74.4499	75.4238	95.0323	63.4059	83.1982	20.4381	19.1329	42.1978	32.9122	28.1182
62	192.334	233.296	201.496	246.012	270.374	220.642	199.269	144.064	258.587	224.009	156.227	128.241	171.787	179.335	222.752	168.763	190.314	123.658	78.0405	199.951	112.424	144.241	38.9067	53.6269	53.7773	68.734	58.1726	74.4697	40.4474	38.1862	47.2995	34.5337	44.5004	90.8709	96.039	122.244	109.767	94.6666	102.779	72.6827	75.2577	93.953	63.01	82.9444	20.9822	19.9163	42.9162	33.2627	27.9043
63	188.033	232.084	197.822	244.486	272.024	219.607	201.124	142.316	256.17	220.596	153.608	126.622	169.405	178.841	221.365	165.811	189.128	125.068	76.4869	196.252	111.966	140.736	39.8198	50.9116	54.8777	69.7474	57.6544	74.0375	40.7223	38.41	47.8839	33.8019	43.6812	90.2761	93.8309	122.095	110.343	95.2568	102.291	73.0516	74.9474	93.6518	62.6593	81.8333	21.2695	19.988	43.927	34.4128	28.0874
64	186.531	231.126	196.298	238.496	255.458	216.119	202.726	140.065	252.88	217.188	151.306	124.77	166.725	177.09	217.644	165.066	186.066	125.336	75.877	192.787	113.298	138.566	40.1144	52.2758	55.0296	69.7325	59.5734	74.9035	42.0997	38.3439	48.3526	35.7066	45.0637	89.5683	94.5914	121.223	109.433	95.3352	102.299	72.8911	75.0621	92.8943	62.5301	80.651	22.1632	20.9526	44.7682	34.4726	29.4803
65	181.508	230.498	196.71	235.977	259.716	216.204	201.456	140.306	248.02	219.898	148.077	123.684	159.22	174.496	214.508	160.987	185.021	125.884	74.6863	190.348	110.387	136.355	39.5891	49.3668	56.1456	70.432	59.5962	73.6123	40.4304	39.8644	48.1287	35.8986	45.356	89.2521	92.3994	122.376	108.465	95.6482	100.684	71.3618	73.4852	93.4412	62.5966	80.122	21.9109	19.8142	45.4958	34.9897	30.5112
66	178.634	228.911	192.37	233.099	260.065	212.812	200.179	136.522	240.112	217.465	148.906	121.979	159.629	175.001	213.027	162.617	181.704	125.687	74.9945	187.323	109.549	134.729	39.7861	52.2597	56.0738	71.9521	58.7312	75.1406	41.5724	39.2897	48.2732	36.064	46.3843	89.5299	90.4953	121.321	109.811	95.0371	101.319	73.9022	73.4428	92.426	62.5538	78.2562	22.5743	19.657	46.1749	36.7686	29.8888
67	177.921	222.587	189.335	230.322	253.11	209.142	195.513	136.081	237.026	215.837	146.13	119.738	159.977	171.163	207.35	161.19	179.332	123.763	73.7435	183.829	109.374	133.367	40.2987	50.4947	56.5295	71.3964	60.4347	74.6288	43.0209	40.2037	47.7785	37.2807	45.9852	88.7622	94.5635	120.664	107.483	95.7117	99.8305	72.5009	72.7119	92.0262	61.844	79.962	22.703	20.8755	47.2769	36.2294	31.2821
68	174.677	225.23	185.313	228.123	255.017	205.37	196.297	134.098	236.786	217.849	144.73	118.046	155.926	170.031	203.683	160.31	177.05	126.489	73.1988	182.85	108.784	130.766	40.7293	50.6931	57.1696	71.4156	60.3155	74.3592	42.7217	39.2339	48.2514	36.8064	44.5663	87.119	87.4839	119.973	107.578	94.1193	98.7867	73.0334	72.1905	91.1564	62.0167	78.9649	22.6321	21.098	48.1453	36.9466	31.2929
69	171.127	215.226	182.187	223.303	251.995	207.825	194.998	134.714	230.885	215.029	143.137	116.232	152.158	167.019	201.119	156.902	175.306	125.106	71.4609	180.589	107.98	130.795	42.1306	50.8087	57.9129	72.1187	60.8235	74.1711	44.3461	38.6466	48.4526	36.9989	44.3222	87.924	91.0862	118.728	106.811	93.89	98.7984	73.3156	71.5531	91.663	60.7243	77.9043	23.6567	21.9324	48.8687	37.2004	32.4396
70	169.699	213.498	178.665	222.464	253.513	205.689	198.464	133.538	226.993	213.966	142.005	114.414	148.729	164.69	199.277	155.689	173.129	126.044	71.0813	176.576	109.199	127.653	41.8787	51.5296	57.1561	71.5532	60.2597	74.4978	44.1305	38.9117	48.1129	37.3754	45.2101	87.2618	87.4772	118.209	107.276	93.7489	99.1045	72.9785	71.0933	91.0158	60.7392	76.0491	23.9147	20.6368	48.8105	38.0385	32.1199
71	167.389	211.89	176.181	218.137	249.973	200.132	195.169	131.992	228.179	217.715	142.104	113.897	147.922	163.461	195.202	153.961	172.961	124.734	69.8569	175.642	107.024	127.111	41.7731	52.365	57.6906	71.8259	61.1121	75.3581	42.9387	39.1975	49.6275	36.6011	44.1194	86.727	89.1546	117.345	105.588	92.5443	98.3343	71.4844	71.0839	90.0868	61.1142	75.3893	24.0268	21.6341	49.6059	38.2557	32.0225
72	166.501	210.808	173.215	213.811	241.51	201.75	190.351	129.663	222.198	217.324	143.713	111.428	147.349	162.882	193.191	152.852	169.503	124.687	70.0865	174.476	109.058	126.742	40.9934	51.1639	57.4718	72.0839	60.3618	75.3735	45.354	38.5065	49.6276	37.1001	43.1004	86.2899	86.6226	116.947	105.108	92.921	97.65	72.7934	70.3676	89.8445	61.2242	76.3275	24.4428	21.6781	50.2398	38.5904	32.7294
73	163.536	203.497	173.211	213.975	242.02	198.889	194.948	129.985	222.136	215.469	139.666	110.421	141.763	160.903	190.255	151.69	168.841	122.455	70.0499	172.758	109.029	124.576	42.0441	50.0071	58.8191	71.996	60.9875	75.2478	43.2323	39.2752	49.7211	36.5804	44.942	85.4574	87.4924	116.365	104.264	92.3056	96.7537	73.1451	69.4602	89.4982	60.315	75.0502	24.8565	22.1786	50.6907	38.686	33.406
74	158.979	203.365	169.111	208.843	243.91	196.228	193.279	127.803	219.724	215.389	138.188	108.594	141.088	157.83	188.914	153.198	167.006	123.037	68.9801	170.495	110.195	122.982	43.4991	50.9874	58.6156	73.0003	61.9444	75.0717	44.1291	39.0161	49.8862	37.4493	45.9392	85.1302	85.2981	115.539	103.662	92.1784	96.6367	71.1868	69.9375	89.2827	60.2776	74.8961	25.6482	22.1083	51.4503	38.9589	33.841
75	157.963	209.129	165.533	206.893	240.898	193.936	187.659	126.73	210.312	214.573	137.554	107.035	146.241	157.201	185.613	151.943	166.9	121.994	68.7016	168.639	108.467	122.072	42.8425	54.2393	59.5155	73.694	61.8863	74.1928	46.4211	39.0754	50.2628	37.6636	44.8824	84.6227	87.0351	115.601	103.697	91.5383	96.5642	72.0168	69.1689	88.827	60.4761	75.3137	25.3999	24.4879	52.184	40.1816	34.2037
76	155.317	209.547	163.852	205.065	243.765	194.68	191.018	126.478	214.442	213.915	136.939	105.246	150.352	154.642	183.298	149.321	164.793	121.503	68.2961	167.719	110.259	120.322	42.9271	56.2449	58.5419	72.7081	61.5366	75.1513	43.4704	39.4087	48.9115	38.3878	44.8207	84.3367	86.978	114.567	102.828	92.0145	95.9525	71.9067	68.8844	88.4226	60.4707	74.7127	26.1646	24.6067	52.737	39.9938	34.7402
77	152.107	198.318	163.041	200.988	242.564	194.451	184.961	126.235	210.376	212.115	136.856	103.814	145.994	152.421	179.327	148.856	163.075	119.908	67.8826	164.335	110.953	118.464	43.8563	52.2644	58.4648	72.3075	61.1947	74.5216	44.8102	39.8247	49.11	39.6658	44.5617	83.4939	88.2957	113.447	101.172	92.0283	95.1377	71.3929	68.7958	87.8291	60.5637	73.1018	26.5075	24.5471	52.5629	40.5059	35.2279
78	152.284	201.062	159.149	199.726	230.956	192.743	184.958	123.744	212.609	215.598	139.107	102.248	141.99	150.943	178.371	146.998	162.76	119.255	67.6746	161.66	109.295	116.615	43.6304	55.3827	59.5144	73.1203	62.5109	75.6032	46.0843	40.6078	50.0965	38.8806	43.6191	84.0631	84.2792	112.451	102.515	91.7827	94.9923	71.6861	68.1767	87.7252	61.17	72.9692	26.6713	24.2126	53.2444	41.3541	35.9619
79	149.106	198.673	157.757	196.07	230.713	189.264	186.857	124.451	207.402	209.687	135.398	101.194	143.61	150.383	176.12	145.269	160.237	119.751	68.0893	161.77	109.611	116.507	43.1175	53.83	58.5779	72.7874	61.0824	75.4269	46.4145	39.7982	50.9686	38.9383	45.1124	82.7353	84.1283	111.891	99.897	89.7957	94.2439	71.664	67.2682	87.553	60.4774	72.6301	27.0876	23.2057	53.5587	40.483	35.393
80	147.26	192.85	155.667	195.114	227.576	187.984	185.448	125.255	203.374	209.337	137.901	99.1964	136.397	144.518	173.981	144.553	158.95	119.108	66.256	158.278	109.235	113.66	43.3513	50.5434	58.7377	72.4617	61.7299	75.3325	46.7166	39.7806	50.4275	38.6578	44.2326	81.6125	85.6198	111.765	100.02	91.2529	93.3904	71.1703	67.2461	87.4195	61.409	71.3178	27.2082	24.0583	54.1056	41.1638	36.1771
81	145.074	192.014	154.677	192.31	225.478	191.38	192.914	124.026	202.072	207.218	134.729	97.7724	133.235	147.064	171.798	142.454	160.35	118.258	67.6116	157.579	107.322	113.221	42.4923	53.869	59.1605	71.7108	61.7674	76.1579	45.46	40.3366	50.6943	39.0627	45.2958	80.6226	82.7521	110.452	98.5341	89.5368	93.6244	70.9015	66.8614	86.8336	60.6398	71.5934	26.6438	25.6514	54.2849	40.8819	36.1879
82	142.524	207.454	151.668	191.408	221.367	187.081	187.208	124.004	205.963	208.197	132.86	97.6686	141.047	143.66	170.115	141.571	158.375	118.399	66.3348	154.663	107.714	110.99	44.097	56.0264	59.8489	72.5262	62.1385	76.6031	46.052	38.4565	51.236	39.7328	45.151	80.8969	83.0733	110.378	99.2016	89.9223	93.126	71.451	66.5927	85.6893	60.596	72.019	27.6103	25.4665	54.9245	41.8589	37.3976
83	143.606	195.559	152.127	188.285	219.185	182.708	187.455	121.761	201.328	201.302	136.358	96.0359	136.014	142.083	167.58	140.356	156.586	116.128	66.2594	154.555	108.907	110.697	43.5713	53.1184	59.2595	72.5203	61.2228	74.2964	46.8652	40.7564	51.5443	38.9065	43.9884	80.4631	87.03	109.619	99.7533	88.5539	91.2148	70.1165	66.2509	85.3009	60.8275	69.8437	27.0952	25.4612	54.9738	42.8223	36.844
84	140.312	199.771	151.145	184.795	219.253	184.216	184.091	123.259	195.566	201.631	133.037	94.1379	129.044	141.226	166.762	140.263	153.764	114.802	65.4696	153.538	109.795	108.275	44.2519	52.617	59.8341	73.1727	60.7013	74.7584	44.911	39.8951	51.972	39.0207	44.0897	78.9352	81.3038	108.962	98.4332	89.2163	91.731	70.5293	66.051	85.8516	60.1553	70.2268	27.7287	24.9179	55.3839	42.6434	37.4791
85	137.719	194.212	147.948	187.686	217.007	183.044	182.331	121.323	197.846	196.696	131.256	92.5372	132.165	140.099	165.875	137.718	153.059	115.942	66.9579	150.819	108.524	108.174	42.4812	57.9338	59.641	72.8786	62.0685	74.5837	46.1015	39.4944	50.8478	39.3453	44.0936	77.6789	86.1402	108.502	98.2786	87.7271	91.8519	70.2512	65.6221	84.6173	59.3452	69.595	27.2191	26.9425	56.3164	43.0249	37.7112
86	136.784	194.172	147.179	182.847	213.334	181.807	187.003	120.911	192.388	194.266	132.087	91.21	123.227	139.568	164.539	138.313	152.552	113.193	67.1729	150.673	107.378	106.64	43.3521	53.3631	59.6676	72.2539	62.0816	75.4906	46.1838	40.9545	50.9166	39.4806	44.4437	78.2505	80.5707	106.744	97.2886	87.9755	90.6956	70.0148	65.1303	84.6416	59.1621	68.9609	28.0694	25.7631	56.2434	42.9251	37.874
87	136.377	201.757	145.45	182.395	211.255	179.388	179.661	121.723	191.852	194.323	129.556	89.9662	128.482	138.476	162.39	135.213	150.179	113.021	66.4803	148.172	108.549	103.615	43.0206	57.2556	60.9084	73.1642	62.9014	73.5516	46.2113	38.4189	51.5019	40.1	45.15	76.5694	80.2892	106.444	95.7067	86.883	90.1759	68.855	65.4804	84.4838	60.0827	70.2445	28.0582	25.7192	56.3283	42.9073	38.7056
88	134.753	198.026	144.525	180.369	211.384	177.422	185.779	119.595	191.361	192.297	129.89	88.9552	135.911	137.871	160.715	134.678	149.961	113.725	67.3335	146.76	108.501	100.112	43.43	55.0128	60.1104	71.2505	60.9687	74.2081	45.6824	39.1604	51.5548	39.2661	44.4595	77.0375	81.1032	106.538	95.9208	86.6369	90.3386	68.749	64.8219	83.4553	60.4586	68.42	28.0946	27.3109	56.8223	43.2229	38.2736
89	133.535	192.284	145.259	178.013	213.394	176.114	182.871	118.749	195.447	191.675	127.556	87.3591	126.87	136.411	159.255	136.714	146.049	113.665	68.6003	145.897	108.907	98.0907	42.986	53.6476	60.2581	71.9424	63.1548	73.909	48.1285	41.0398	51.5048	38.3642	44.1414	75.8053	83.2607	105.207	95.4374	86.6037	88.9954	68.8714	65.2654	83.2658	59.8836	67.682	28.2592	28.064	56.8482	43.8789	38.84
90	132.185	188.477	144.225	176.316	206.941	173.976	181.172	118.554	192.103	187.396	126.694	86.9836	124.65	135.062	157.782	134.498	145.278	112.508	68.0337	144.626	107.628	98.9412	42.3393	53.5857	59.3254	72.7422	60.6936	73.5417	46.9284	39.872	51.7865	39.7636	44.1714	76.6303	78.4855	105.16	94.9968	86.1823	88.843	68.3407	64.4622	82.9636	58.7936	67.7524	28.7056	26.8991	56.7439	43.9985	38.6368
[truncated: 182 more columns]

## Sheet: VASCULAR DENSITY
	VASCULAR DENSITY [% ROI]
	AQP4 (+/+)	AQP4 (-/-)	AQP4 (+/+)	AQP4 (-/-)	AQP4 (+/+)	AQP4 (-/-)	AQP4 (+/+)	AQP4 (-/-)	AQP4 (+/+)	AQP4 (-/-)	AQP4 (+/+)	AQP4 (-/-)	AQP4 (+/+)	AQP4 (-/-)	AQP4 (+/+)	AQP4 (-/-)	AQP4 (+/+)	AQP4 (-/-)	AQP4 (+/+)	AQP4 (-/-)	AQP4 (+/+)	AQP4 (-/-)	AQP4 (+/+)	AQP4 (-/-)	AQP4 (+/+)	AQP4 (-/-)	AQP4 (+/+)	AQP4 (-/-)	AQP4 (+/+)	AQP4 (-/-)	AQP4 (+/+)	AQP4 (-/-)	AQP4 (+/+)	AQP4 (-/-)
	OLF	OLF	CA	CA	RSP	RSP	V1	V1	S1	S1	M1	M1	AUD	AUD	HIP	HIP	PERI	PERI	INS	INS	TH	TH	HAB	HAB	HY	HY	CP	CP	WM	WM	PCS	PCS	EPD	EPD
			26	21	32	32	34	33	31	25	30	31	32	28	30	30	44	27	26	29	28	32	30	45	26	32	27	30		16	30	21	27	23
			20	28	31	35	30	40	26	29	30	31	32	28	30	28	26	28	25	27	29	25	40	30	30	25	25	29	10	21	25	20	26	25
			33	24	36	38	38	39	29	28	28	27	26	35	31	29	25	26	26	26	24	29	28	36	26	22	31	24	23	26	26	16	26	26
	30	34	24	33	34	34	33	28	25	26	36	33	32	28	31	30	38	29	30	43	32	34	35	32		26	35	36	18	18	46	38	25	39
	28	33	32	30	38	42	39	32	25	35	32	43	30	35	29	32	28	37	31	50	28	30	32	43	27	33	30	42	22	13	36	41	30	31
	28	32	36	34	34	36	35	42	29	33	33	37	29	21	31	29	23	29	28	43	25	35	34	45	29	16	33	30	16	13	23	29	33	44
MEAN	28.6667	33	28.5	28.3333	34.1667	36.1667	34.8333	35.6667	27.5	29.3333	31.5	33.6667	30.1667	29.1667	30.3333	29.6667	30.6667	29.3333	27.6667	36.3333	27.6667	30.8333	33.1667	38.5	27.6	25.6667	30.1667	31.8333	17.8	17.8333	31	27.5	27.8333	31.3333
SD	1.1547	1	6.12372	5.08593	2.56255	3.48807	3.3116	5.46504	2.50998	3.93277	2.81069	5.60952	2.40139	5.26941	0.816497	1.36626	8.38252	3.93277	2.42212	10.2307	2.87518	3.65605	4.21505	6.71565	1.81659	6.3456	3.71035	6.27429	5.21536	5.03653	8.67179	10.2518	3.0605	8.4538

[truncated: 4 more sheets: AQP4 EXPRESSION, ISF SPACE VOLUME with TMA, BRAIN H20 CONTENT ex-vivo, CSF PRODUCTION in-vivo]
